# Supplementary material for: State of Wildfires 2023–2024
Source: Copernicus journal article supplement (doi:10.5194/essd-16-3601-2024), 2024-08-13
Supplement: Supplementary file 1 [file essd-16-3601-2024-supplement.pdf]

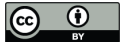

*Supplement of*  
**State of Wildfires 2023–2024**

**Matthew W. Jones et al.**

*Correspondence to:* Matthew W. Jones ([matthew.w.jones@uea.ac.uk](mailto:matthew.w.jones@uea.ac.uk)), Douglas I. Kelley ([doukel@ceh.ac.uk](mailto:doukel@ceh.ac.uk)), Chantelle A. Burton ([chantelle.burton@metoffice.gov.uk](mailto:chantelle.burton@metoffice.gov.uk)), and Francesca Di Giuseppe ([francesca.digiuseppe@ecmwf.int](mailto:francesca.digiuseppe@ecmwf.int))

The copyright of individual parts of the supplement might differ from the article licence.

1 **Supplementary Figures**

2

3 Figures referred to in the main text.

4

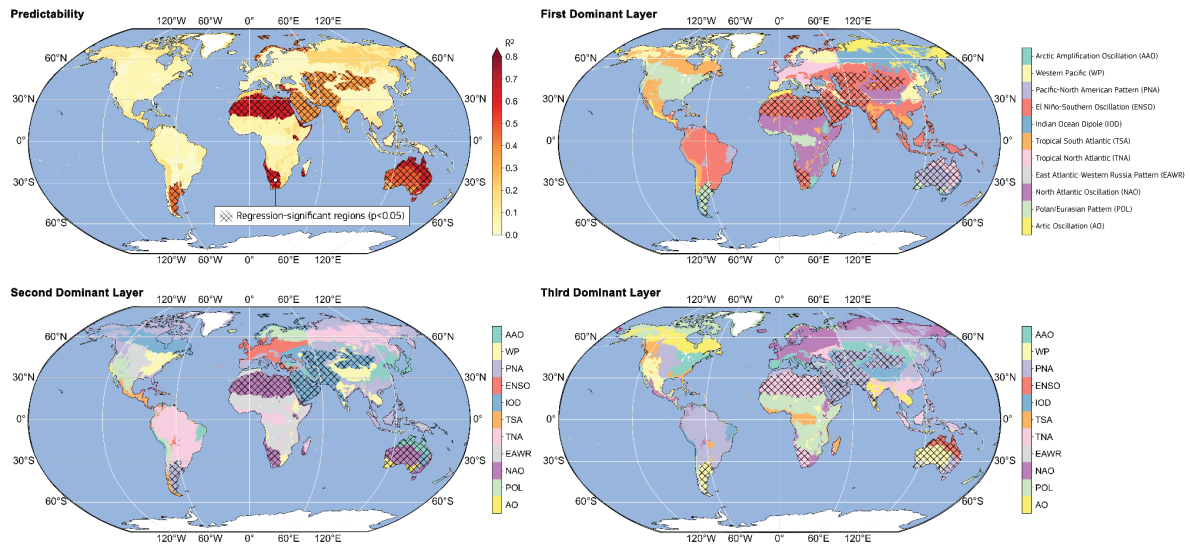

5

6 **Figure S1:** Influence of modes of climate variability on Burned Area (BA) in the period 2001-  
7 2020. The figure maps the mode of climate variability with a dominant (and secondary, and  
8 tertiary) influence on interannual variability in BA. The coefficient of covariation ( $R^2$ ) value  
9 linking BA to each mode is also shown. The modes included are: Antarctic Oscillation (AAO);  
10 West Pacific (WP) pattern; Pacific-North American (PNA) pattern; El Niño-Southern  
11 Oscillation (ENSO); Indian Ocean Dipole (IOD); tropical South Atlantic (TSA) pattern; tropical  
12 North Atlantic (TNA) pattern; East Atlantic/Western Russia (EAWR) pattern; North Atlantic  
13 Oscillation (NAO); Polar-Eurasian (POL) pattern; and the Arctic Oscillation (AO).  
14

15

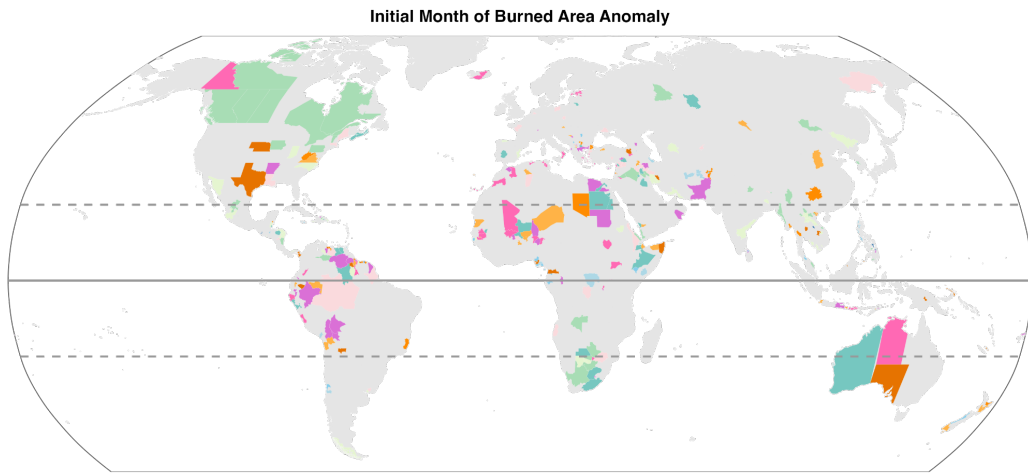

16

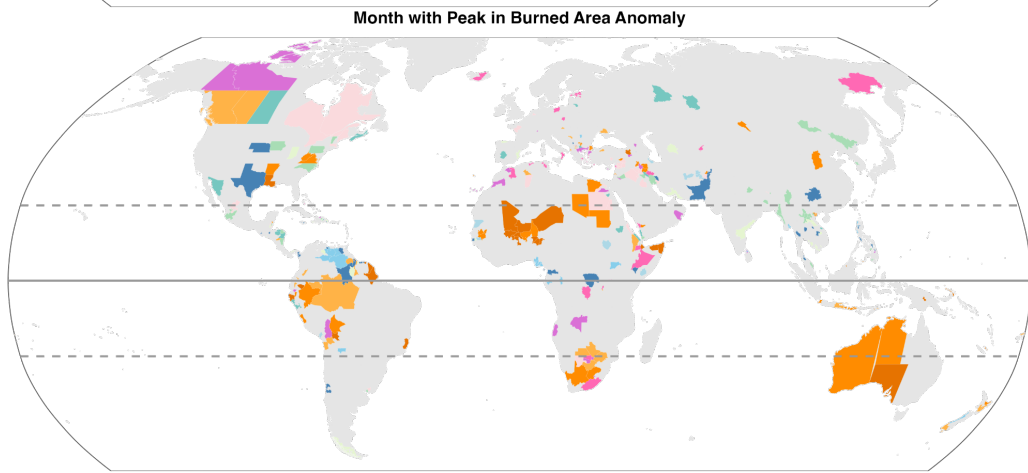

17  
18

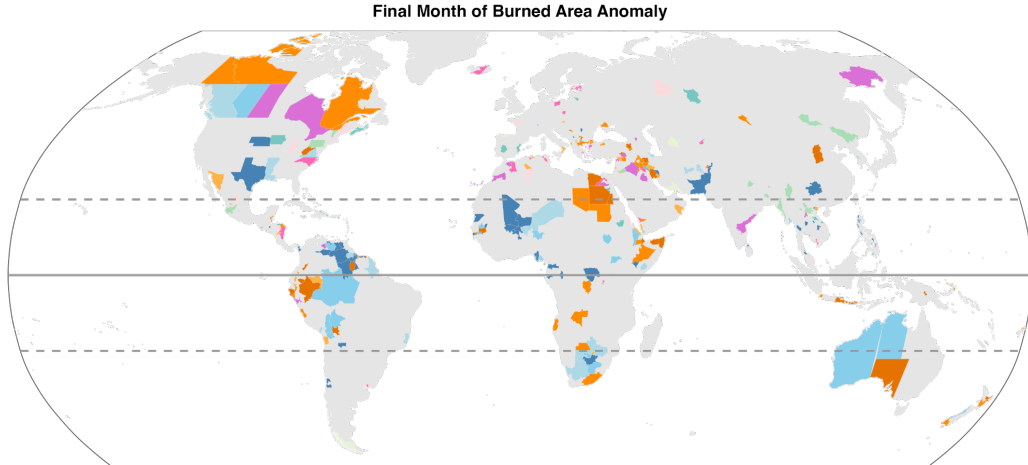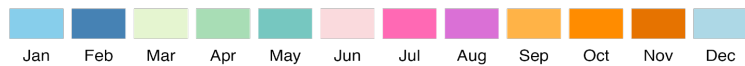

19  
20  
21  
22  
23  
24  
25

**Figure S2: (Top panel)** first month, **(middle panel)** peak month, and **(lower panel)** final month of positive BA anomalies at Global Administrative Level 1 during March 2023-February 2024. Peak anomalies are identified relative to the monthly climatology in 2002-2023. The first and final months of the BA anomaly incorporate the period when BA was continuously above the climatological mean. Graduated colours are separated seasonally.

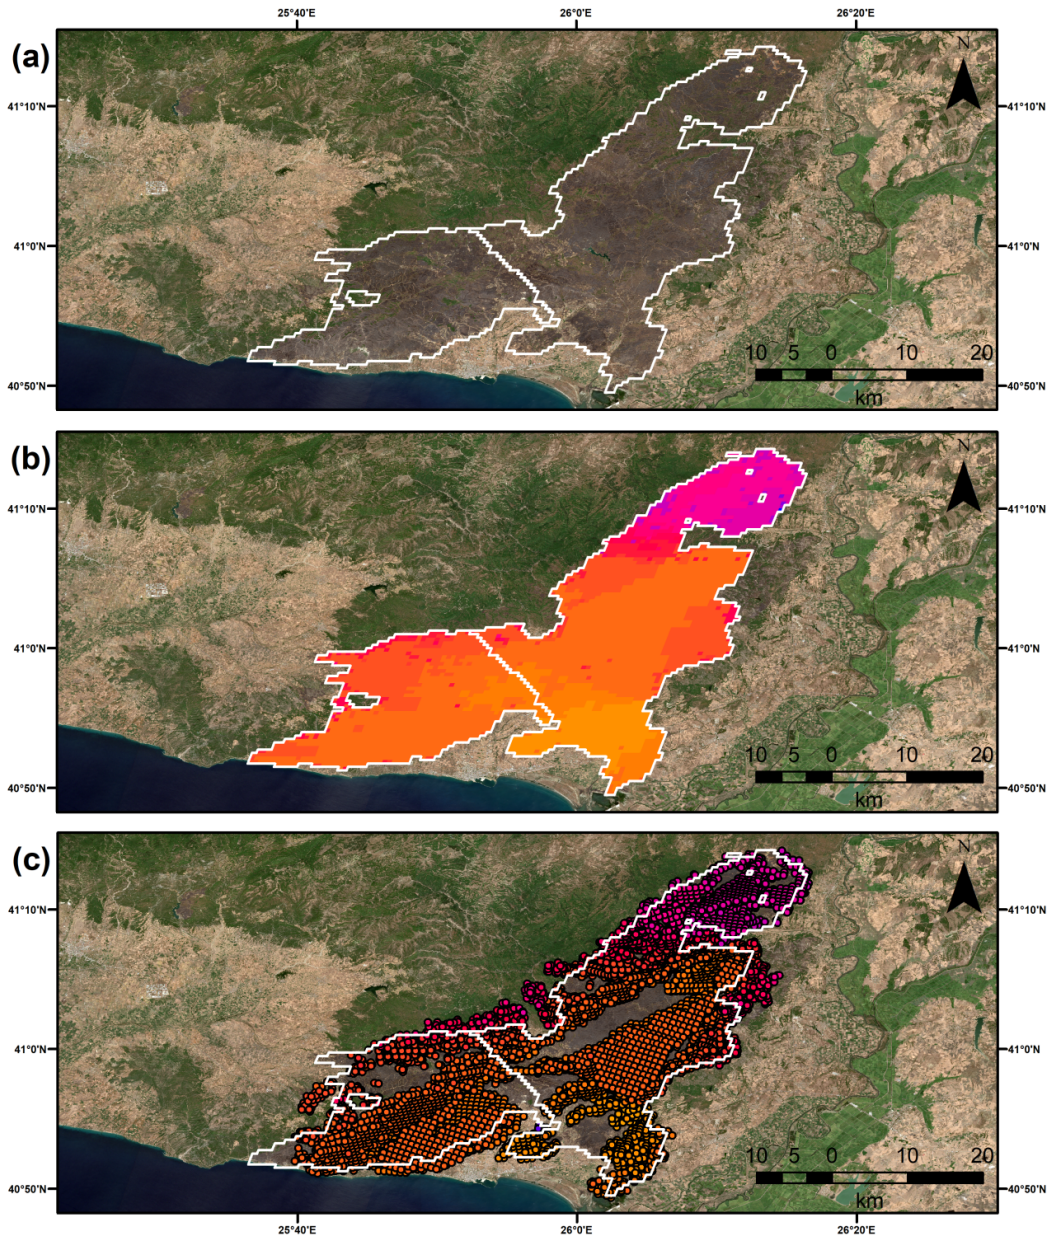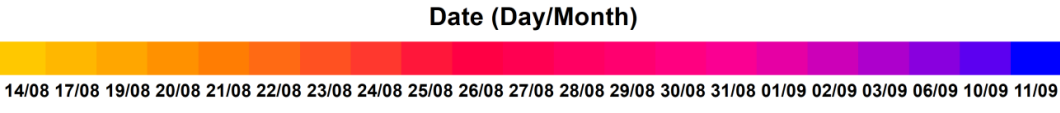

26  
27  
28  
29  
30  
31  
32  
33  
34  
35  
36  
37

**Figure S3:** Perimeter and daily progression of the largest fire ever recorded in the EU (Xanthopoulos et al., 2024; EU Science Hub, 2023), near Alexandroupolis in Macedonia and Thrace, Greece. Panel (a) shows a Sentinel-2 true colour composite image (10 m resolution) from 12th September 2023, the day after the fire ceased to grow. The darker colour of recently-burned surfaces contrasts with green unburned forests in surrounding areas. Overlaying the image are lines marking the perimeter of the Alexandroupolis fire from the Global Fire Atlas. Panel (b) additionally shows the burn date according to the MODIS BA dataset MCD64A1 (500 m resolution), and for comparison panel (c) shows the burn date from active fire detections from the Visible Infrared Imaging Radiometer Suite (VIIRS) sensor (375 m resolution; Schroeder et al., 2014).

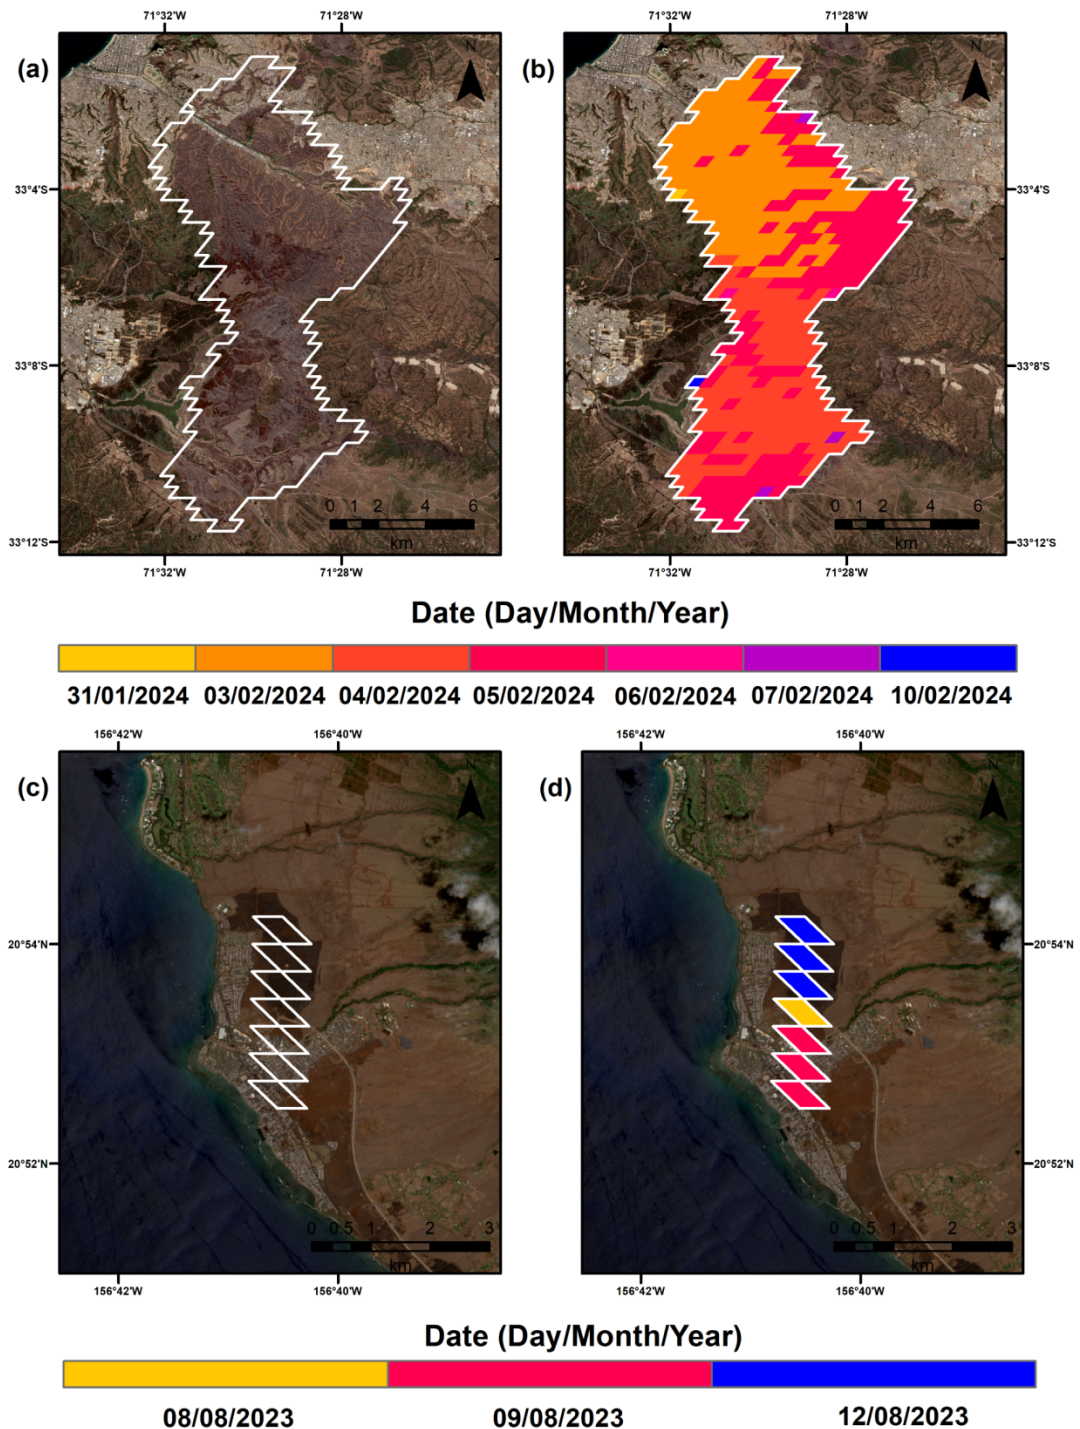

38  
39  
40  
41  
42  
43  
44  
45

**Figure S4:** Perimeter and daily progression of extreme individual fires in (a-b) Valparaíso, Chile, and (c-d) Lahaina, Hawai'i. Panels (a) and (c) show Sentinel-2 true colour composite images (10 m resolution) from 8th March 2024 and 18th August 2023, on the first cloud-free day after each fire. Overlaying the image are lines marking the perimeter of the impactful fire events from the Global Fire Atlas. Panels (b) and (d) additionally show the burn date according to the MODIS BA dataset MCD64A1 (500 m resolution).

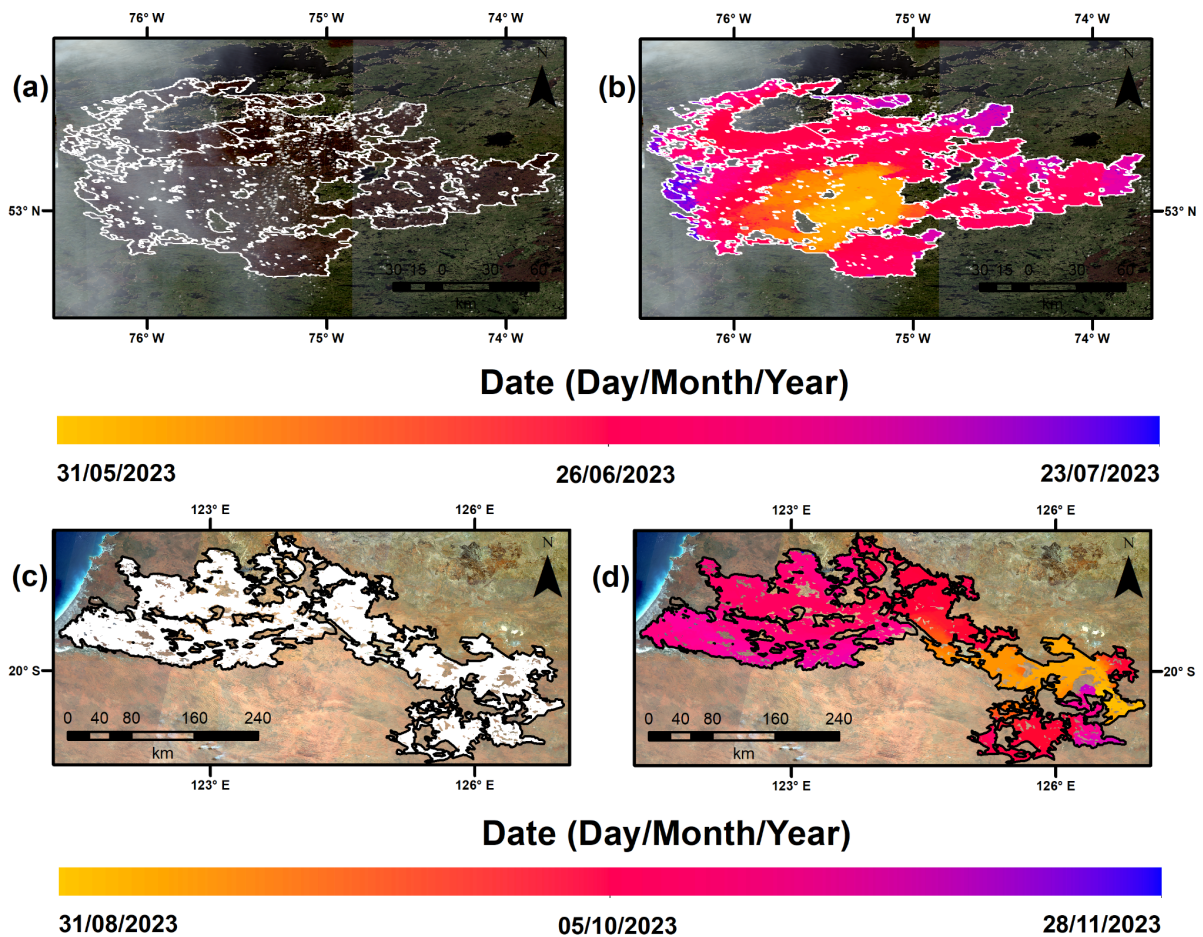

46  
 47 **Figure S5:** Perimeter and daily progression of extreme individual fires **(a-b)**  
 48 near La Grande Reservoir in Quebec, Canada, and **(c-d)** in the Great Sandy Desert and Anna Plains,  
 49 Australia. Panels **(a)** and **(c)** show Sentinel-2 true colour composite images (10 m resolution)  
 50 based on observations in the periods 25/04/2023-25/08/2023 and 02/09/2023 to 08/09/2023,  
 51 respectively. Overlaying the image **(a)** are white lines marking the perimeter of the La Grande  
 52 fire according to the Global Fire Atlas. Overlaying the image **(c)** are white areas marking the  
 53 area burned by the La Grande fire according to the Global Fire Atlas, and black lines marking  
 54 the wildfire perimeter from the Department of Fire and Emergency Services in Western  
 55 Australia. Panels **(b)** and **(d)** additionally show the burn date according to the MODIS BA  
 56 dataset MCD64A1 (500 m resolution).  
 57

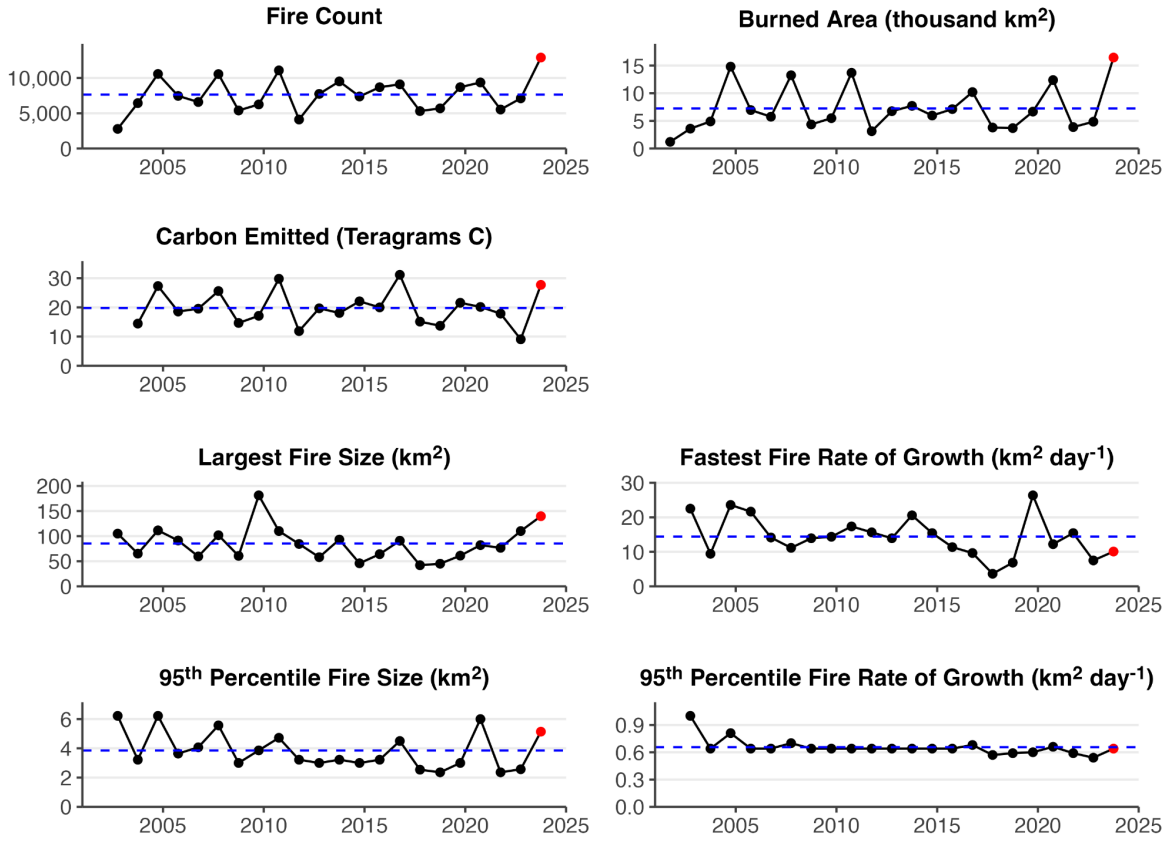

58  
 59 **Figure S6:** Summary of the 2023-2024 fire season in Lao PDR. Time series of annual fire  
 60 count, BA, C emissions, PM2.5 emissions, 95th percentile fire size, fastest daily rate of growth,  
 61 and 95th percentile fire daily rate of growth. Black dots show annual values prior to the latest  
 62 fire season, red dots the values during the latest fire season, and blue dashed lines the  
 63 average values across all fire seasons.

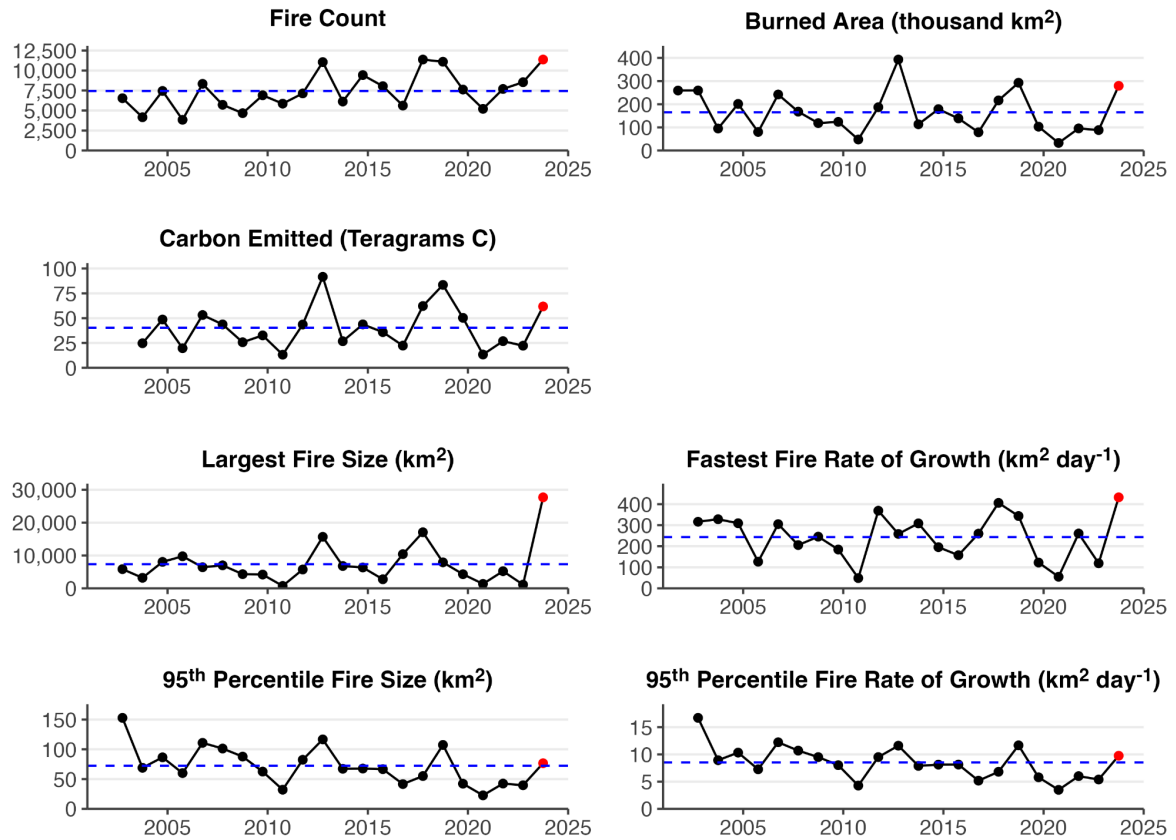

64  
 65 **Figure S7:** Summary of the 2023-2024 fire season in the state of Western Australia. Time  
 66 series of annual fire count, BA, C emissions, PM2.5 emissions, 95th percentile fire size, fastest  
 67 daily rate of growth, and 95th percentile fire daily rate of growth. Black dots show annual values  
 68 prior to the latest fire season, red dots the values during the latest fire season, and blue dashed  
 69 lines the average values across all fire seasons.



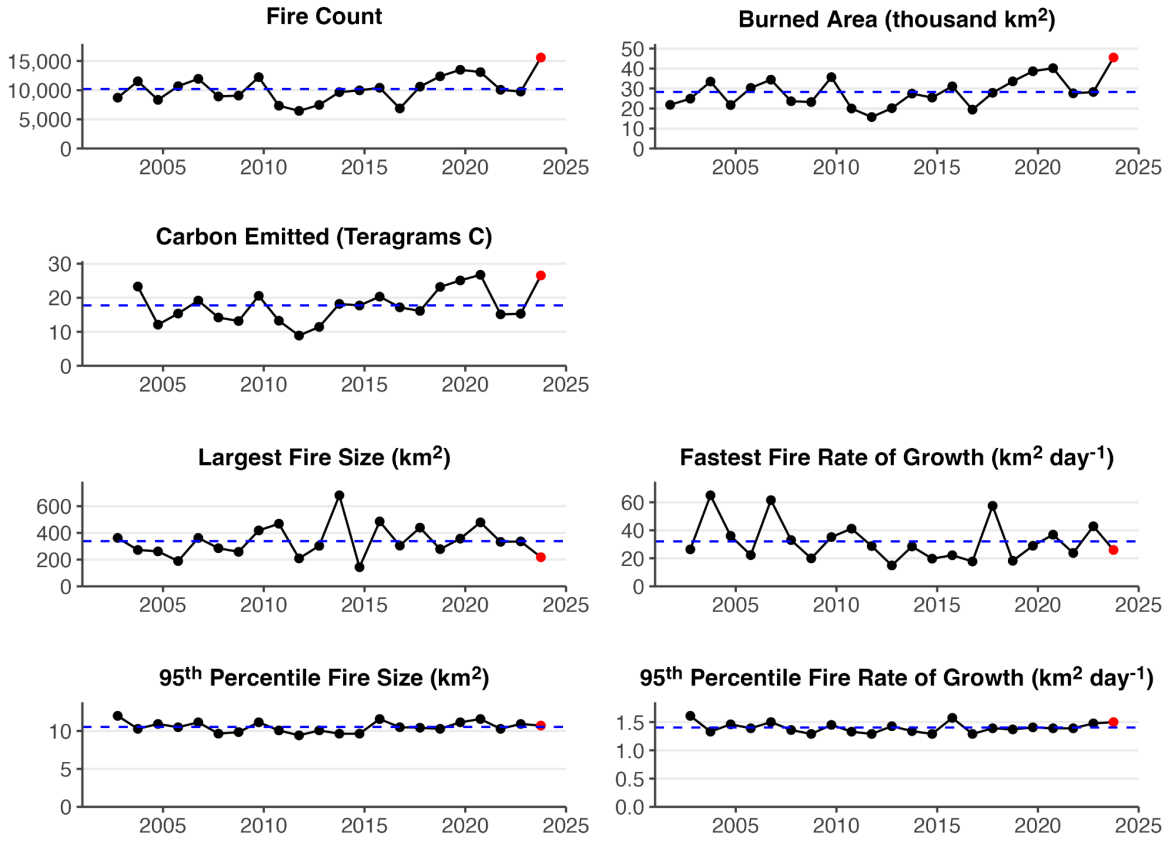

70  
71  
72  
73  
74  
75  
76

**Figure S8:** Summary of the 2023-2024 fire season in Venezuela. Time series of annual fire count, BA, C emissions, PM2.5 emissions, 95th percentile fire size, fastest daily rate of growth, and 95th percentile fire daily rate of growth. Black dots show annual values prior to the latest fire season, red dots the values during the latest fire season, and blue dashed lines the average values across all fire seasons.

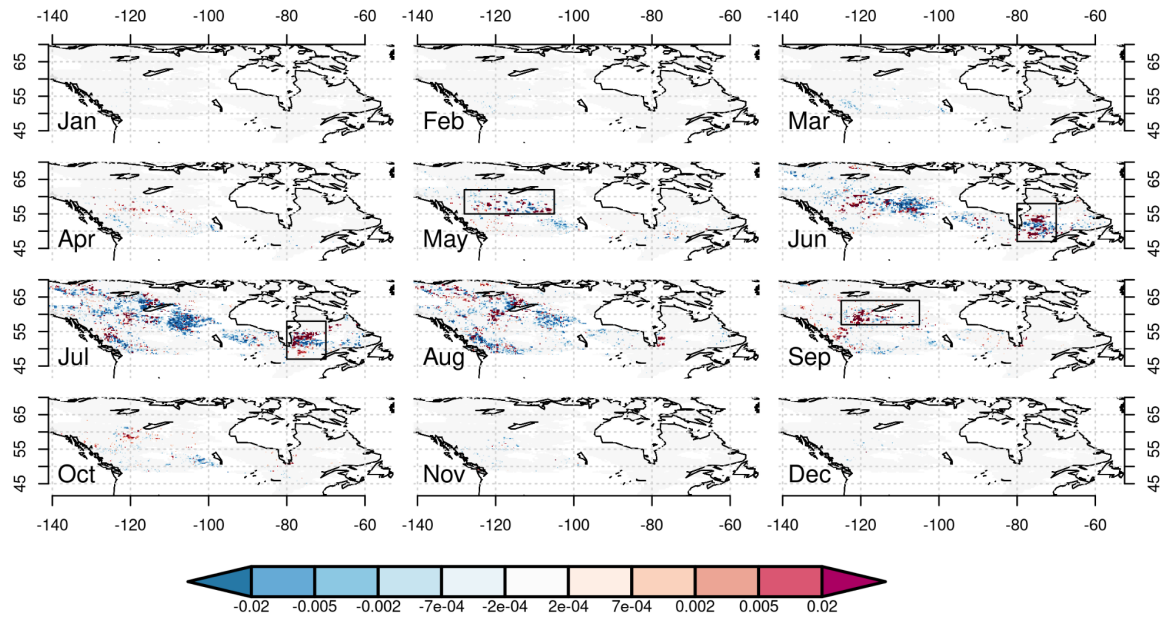

77  
78  
79  
80  
81

**Figure S9:** Monthly BA fraction anomaly at 0.25° for Canada for 2023 compare 2002-2023 climatological average. Boxes indicate focal months and regions in driver attribution (Section 3).

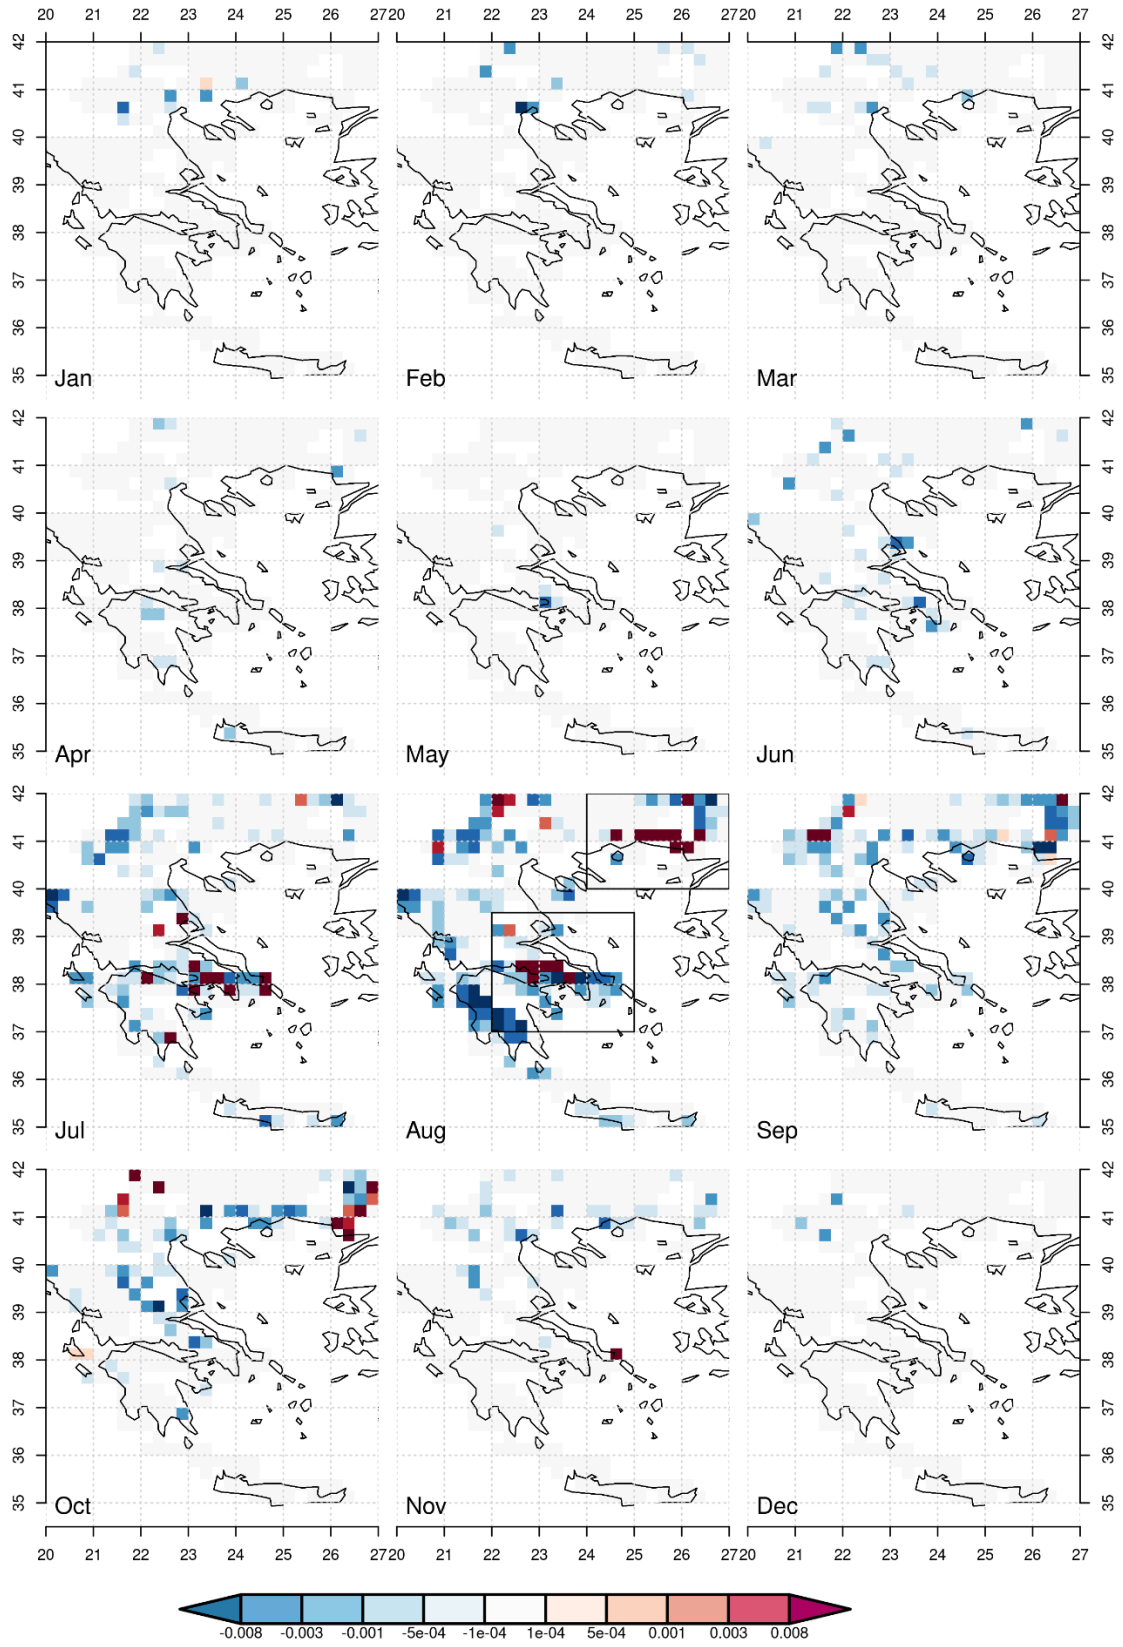

82  
83 **Figure S10: Same as Figure S9 for Greece**

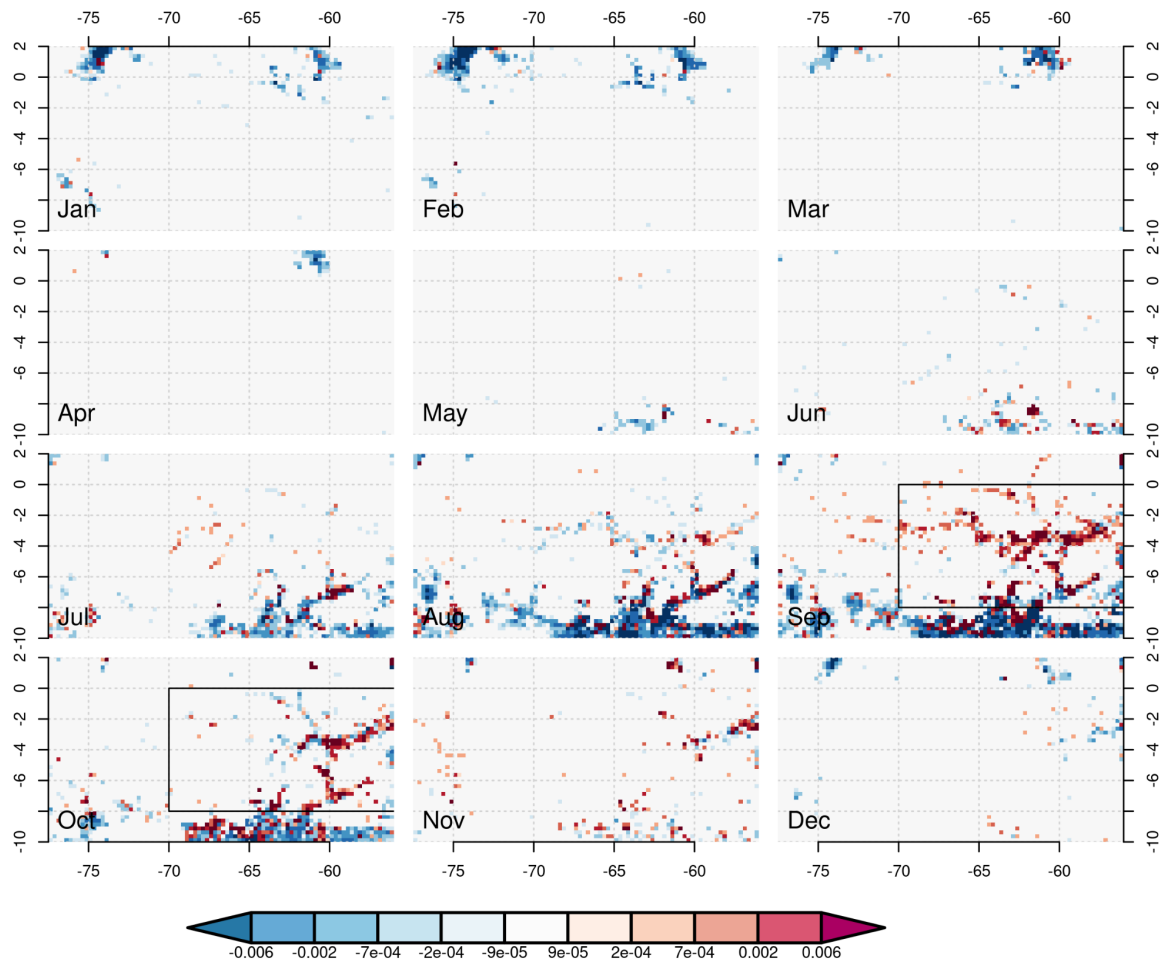

84  
 85 **Figure S11:** Same as **Figure S9** for Western Amazonia  
 86  
 87  
 88

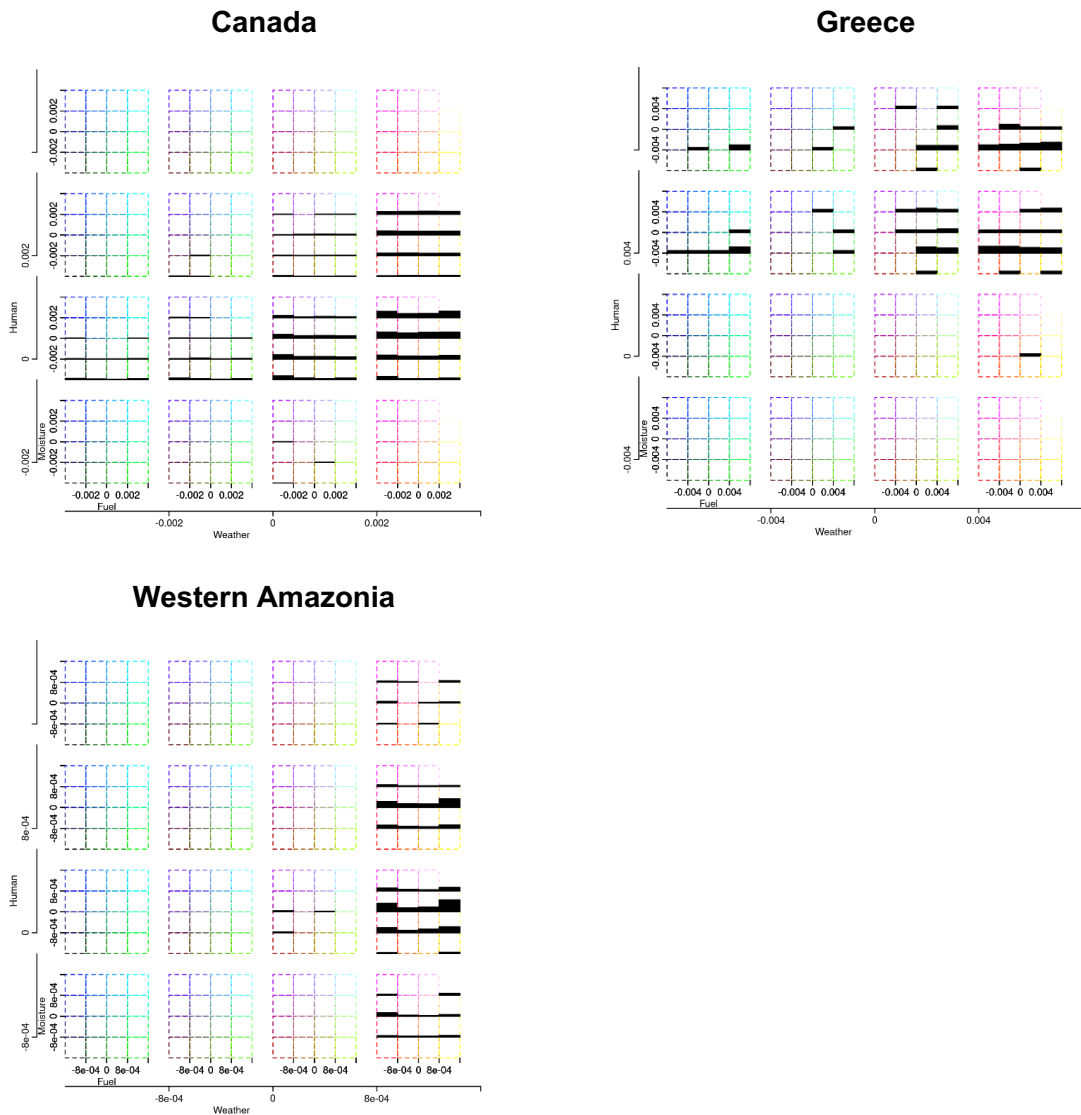

91  
92  
93  
94  
95  
96  
97  
98  
99  
100  
101  
102  
103

**Figure S12:** shows the co-occurrence of anomalies for 2023 of our four controls in different regions. In each box of 16 bins, the bottom left corresponds to the negative influence of fuel and moisture on fire anomalies, the top is the positive influence of fuel moisture, and the right indicates a positive influence of fuel load. The bottom left box indicates the negative influence of fire weather and humans, while the right boxes indicate the positive influence of fire weather, and the top indicates the positive influence of humans. The shading of each bin for each region indicates how much of that region falls into that bin. The shades themselves represent the uncertainty range, with grey indicating the 10th percentile and black indicating the 90th percentile.

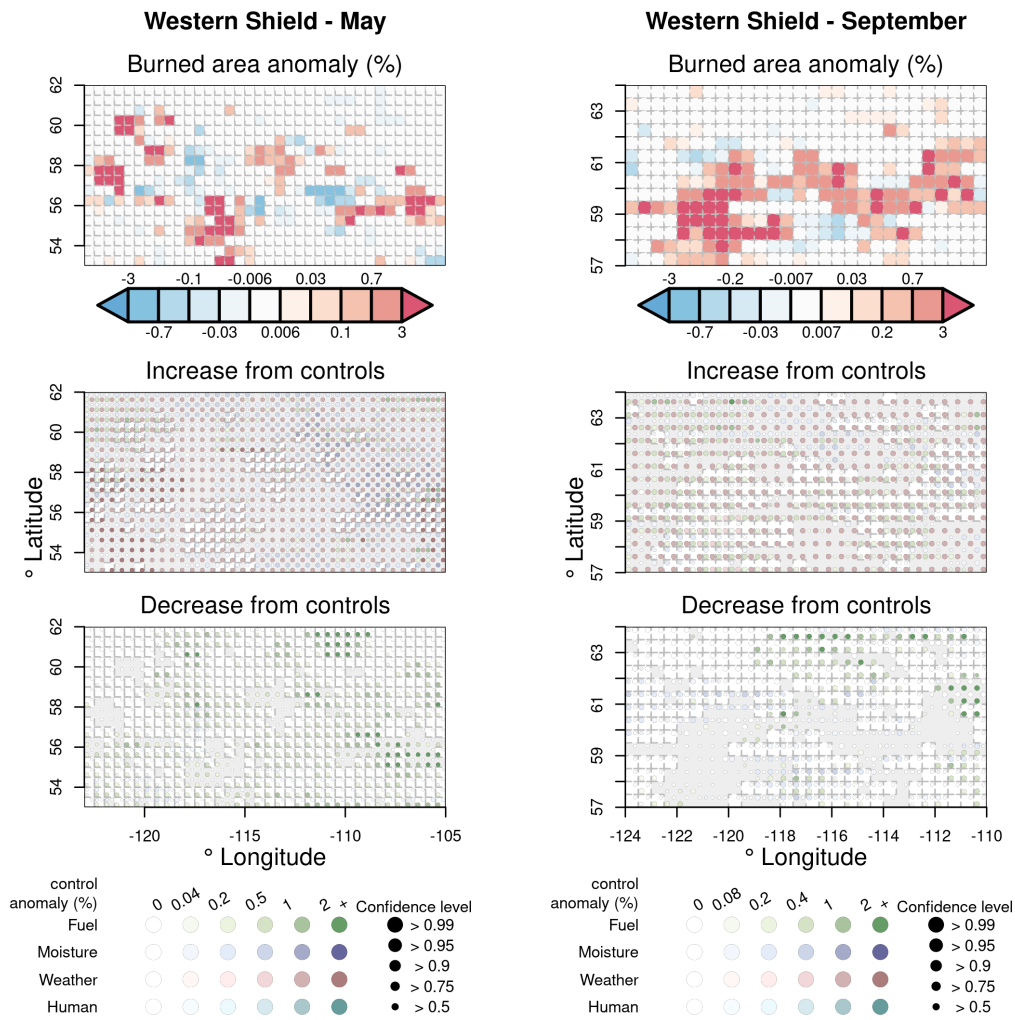

104

105 **Figure S13:** Same as **Figure 11** but for the Canadian Western Shield.

106

107

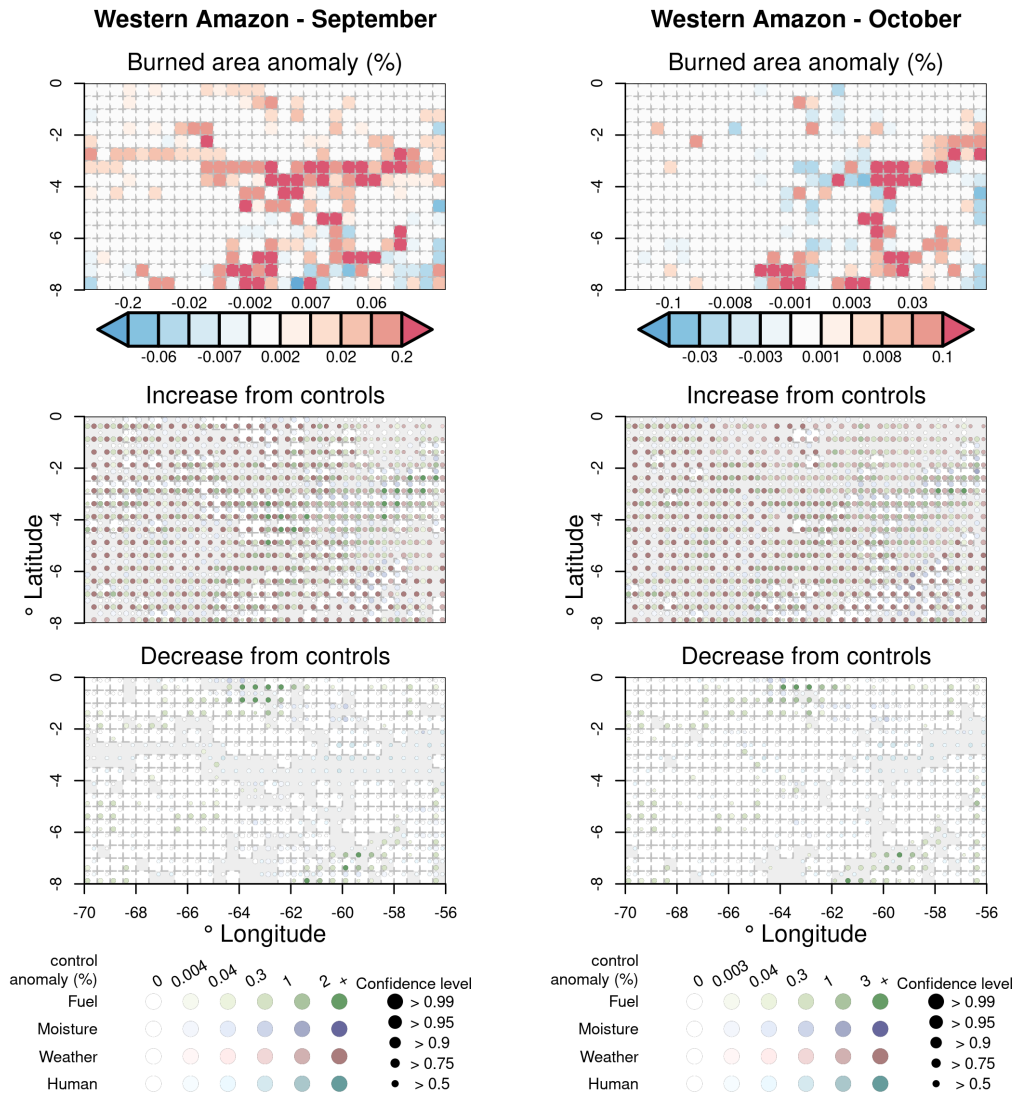

108

109 **Figure S14:** Same as **Figure 11** but for Western Amazonia.

110

111

112

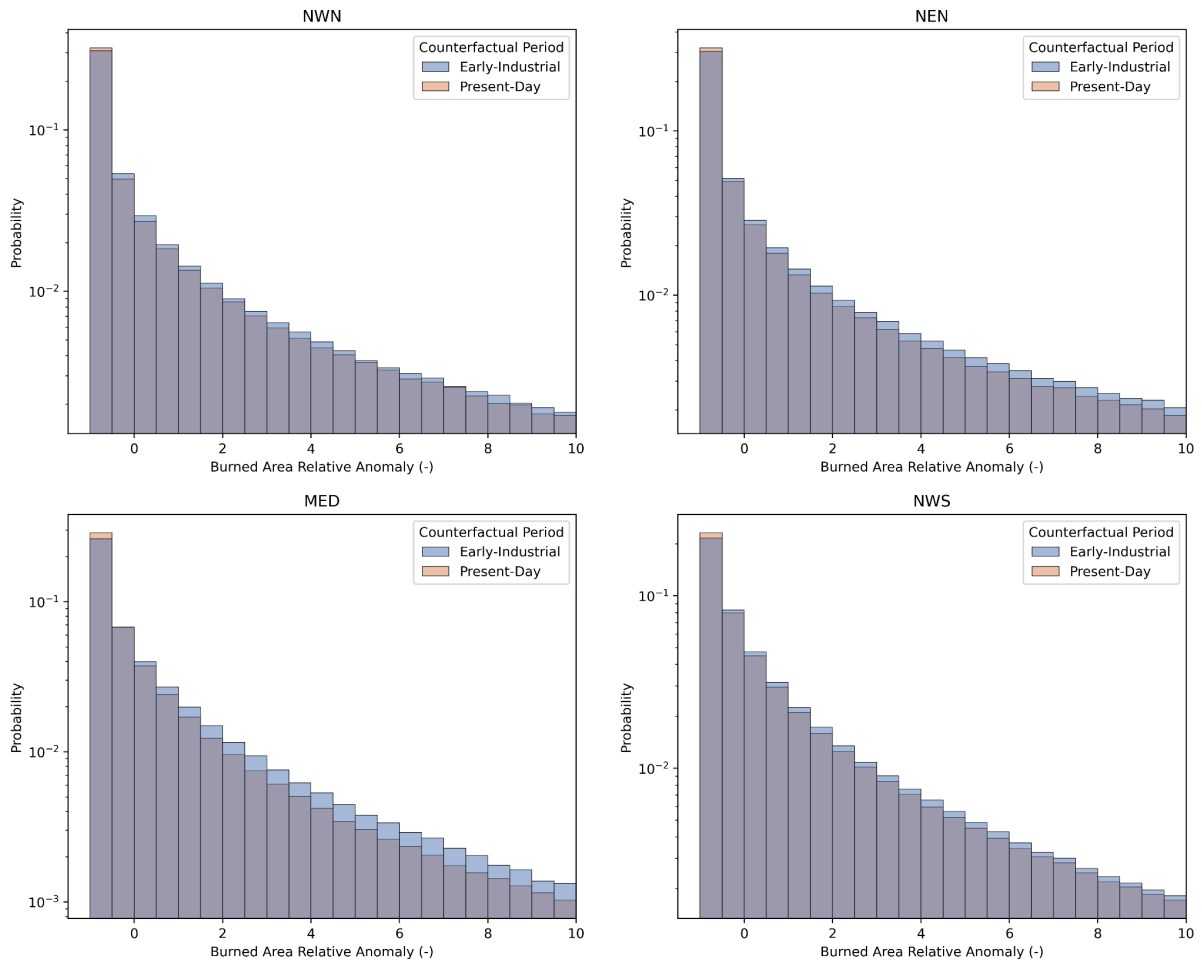

113  
 114  
 115  
 116  
 117  
 118  
 119  
 120

**Figure S15:** Change in median BA anomaly due to socioeconomic factors (population and land-use change) from FireMIP. Present day BA (2003-2019) for counterfactual (detrended climate, orange) compared to early-industrial (1901-1917) in the counterfactual (detrended climate, blue), for AR6 regions. Top row: North West North America (NWN, LEFT) and North East North America NEN (RIGHT). Bottom row: Mediterranean (MED, LEFT), and North West South America (NWS, RIGHT). Probability is shown on a log scale.



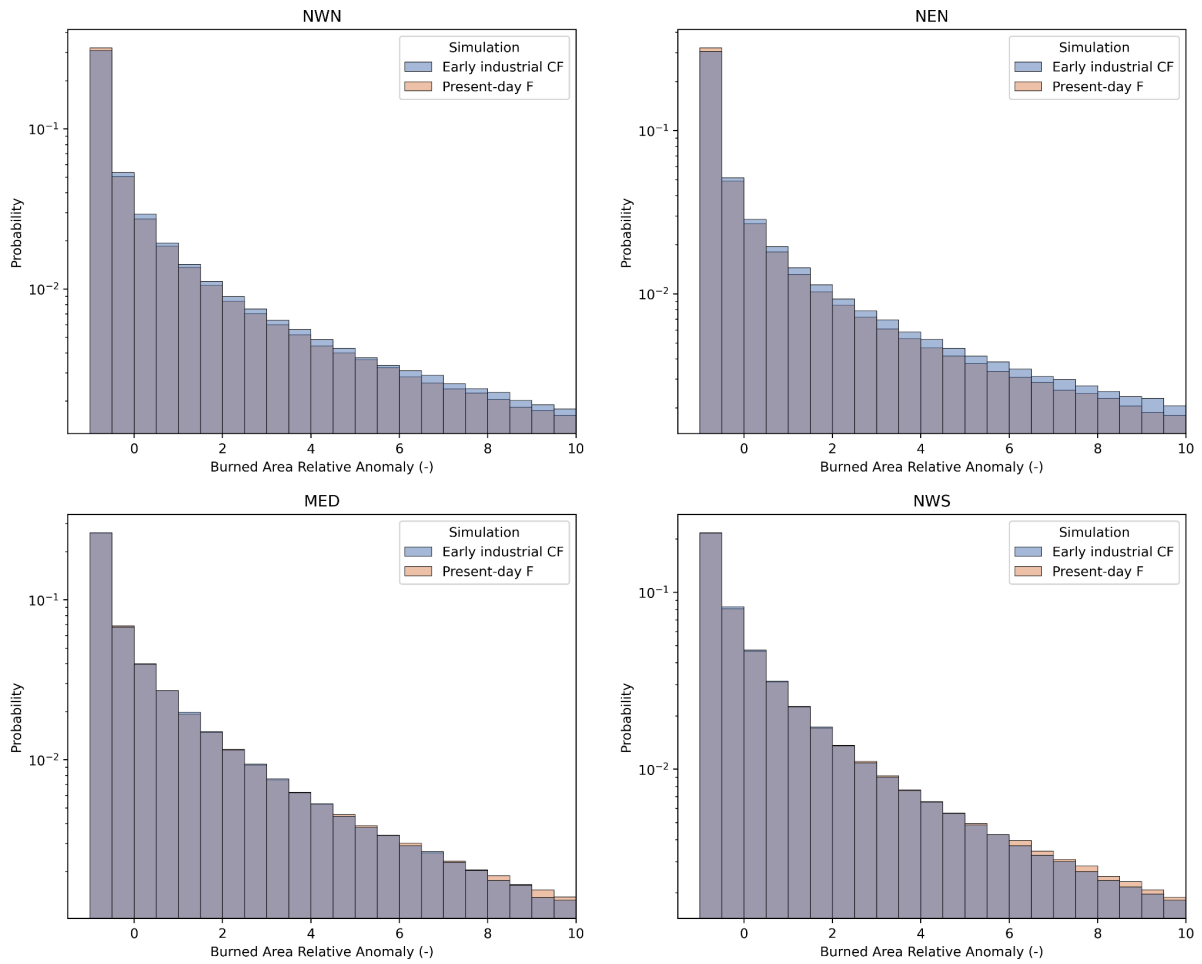

121  
 122 **Figure S16:** Change in median BA anomaly due to all forcing (climate change and  
 123 socioeconomic factors) from FireMIP. Present day BA (2003-2019) for factual (historical  
 124 forcing, orange) compared to early-industrial (1901-1917) in the counterfactual (detrended  
 125 climate, blue), for AR6 regions. Top row: North West North America (NWN, LEFT) and North  
 126 East North America NEN (RIGHT). Bottom row: Mediterranean (MED, LEFT), and North West  
 127 South America (NWS, RIGHT). Probability is shown on a log scale.  
 128

129  
130  
131  
132  
133  
134  
135  
136

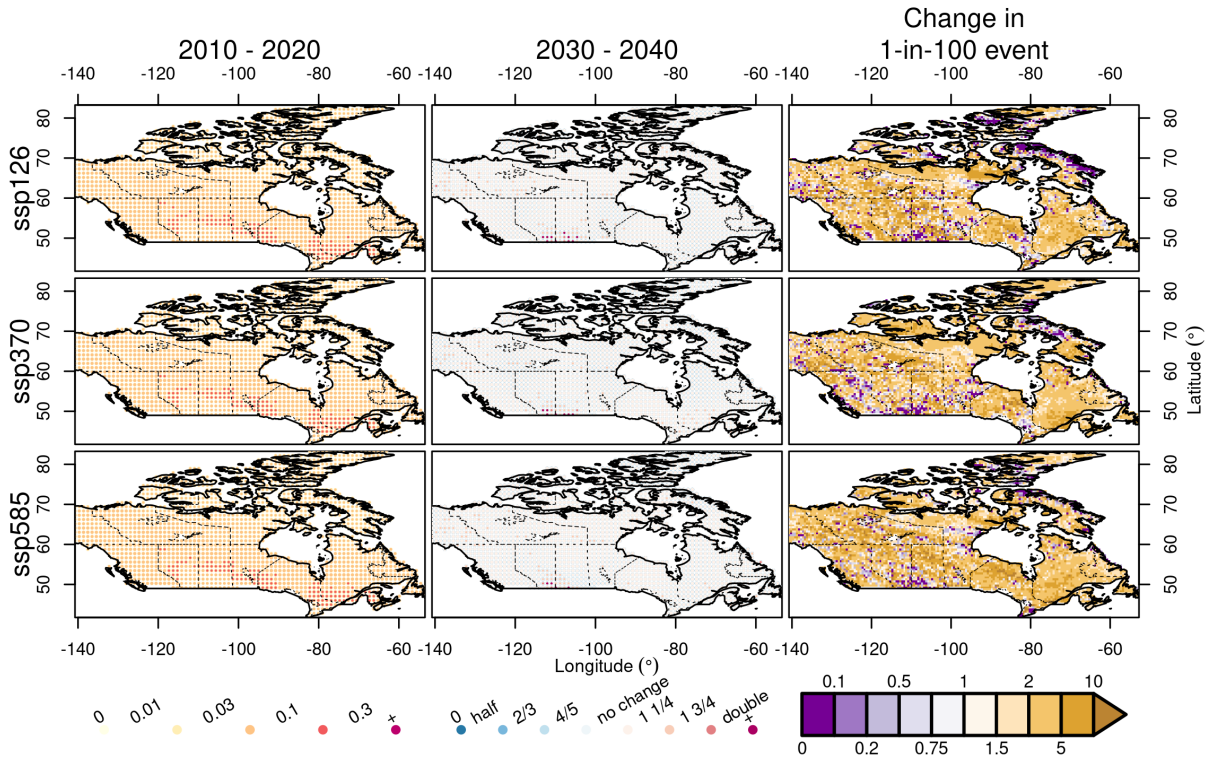

137  
138

**Figure S17:** Same as **Figure 18** but covering 2030-2040

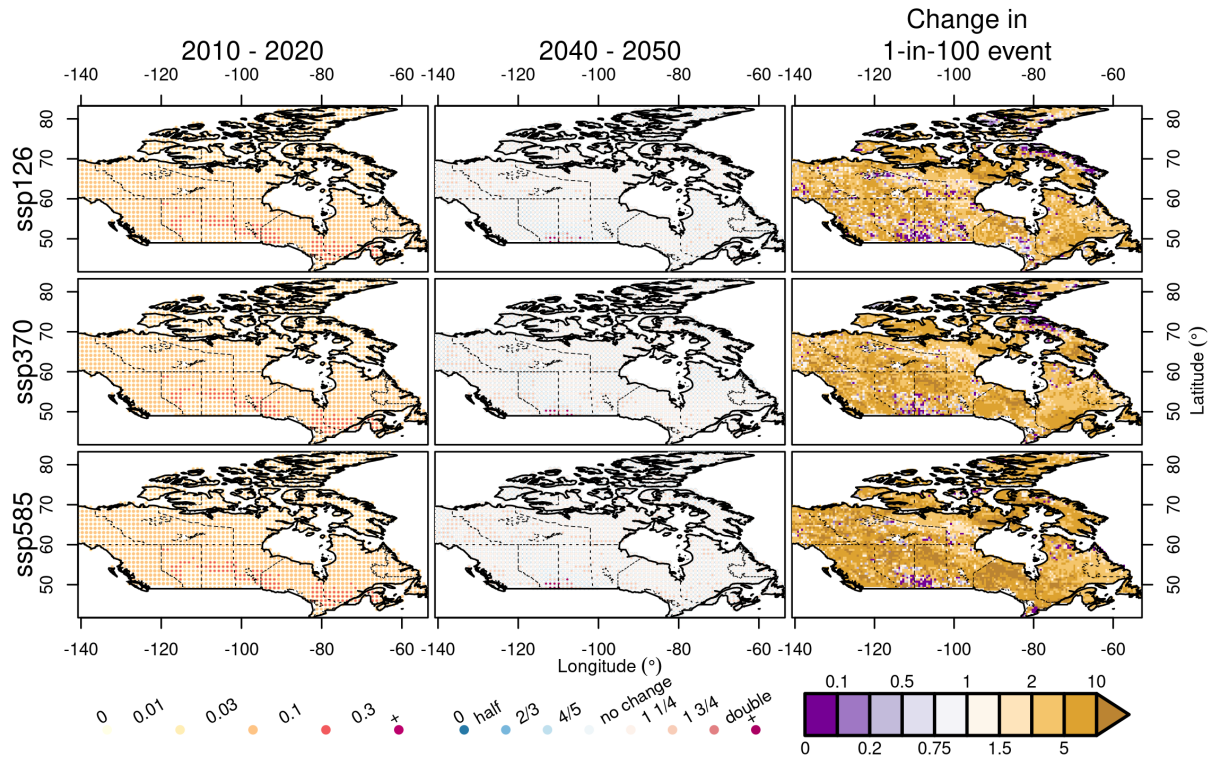

139  
140

Figure S18: Same as Figure 18 but covering 2040-2050

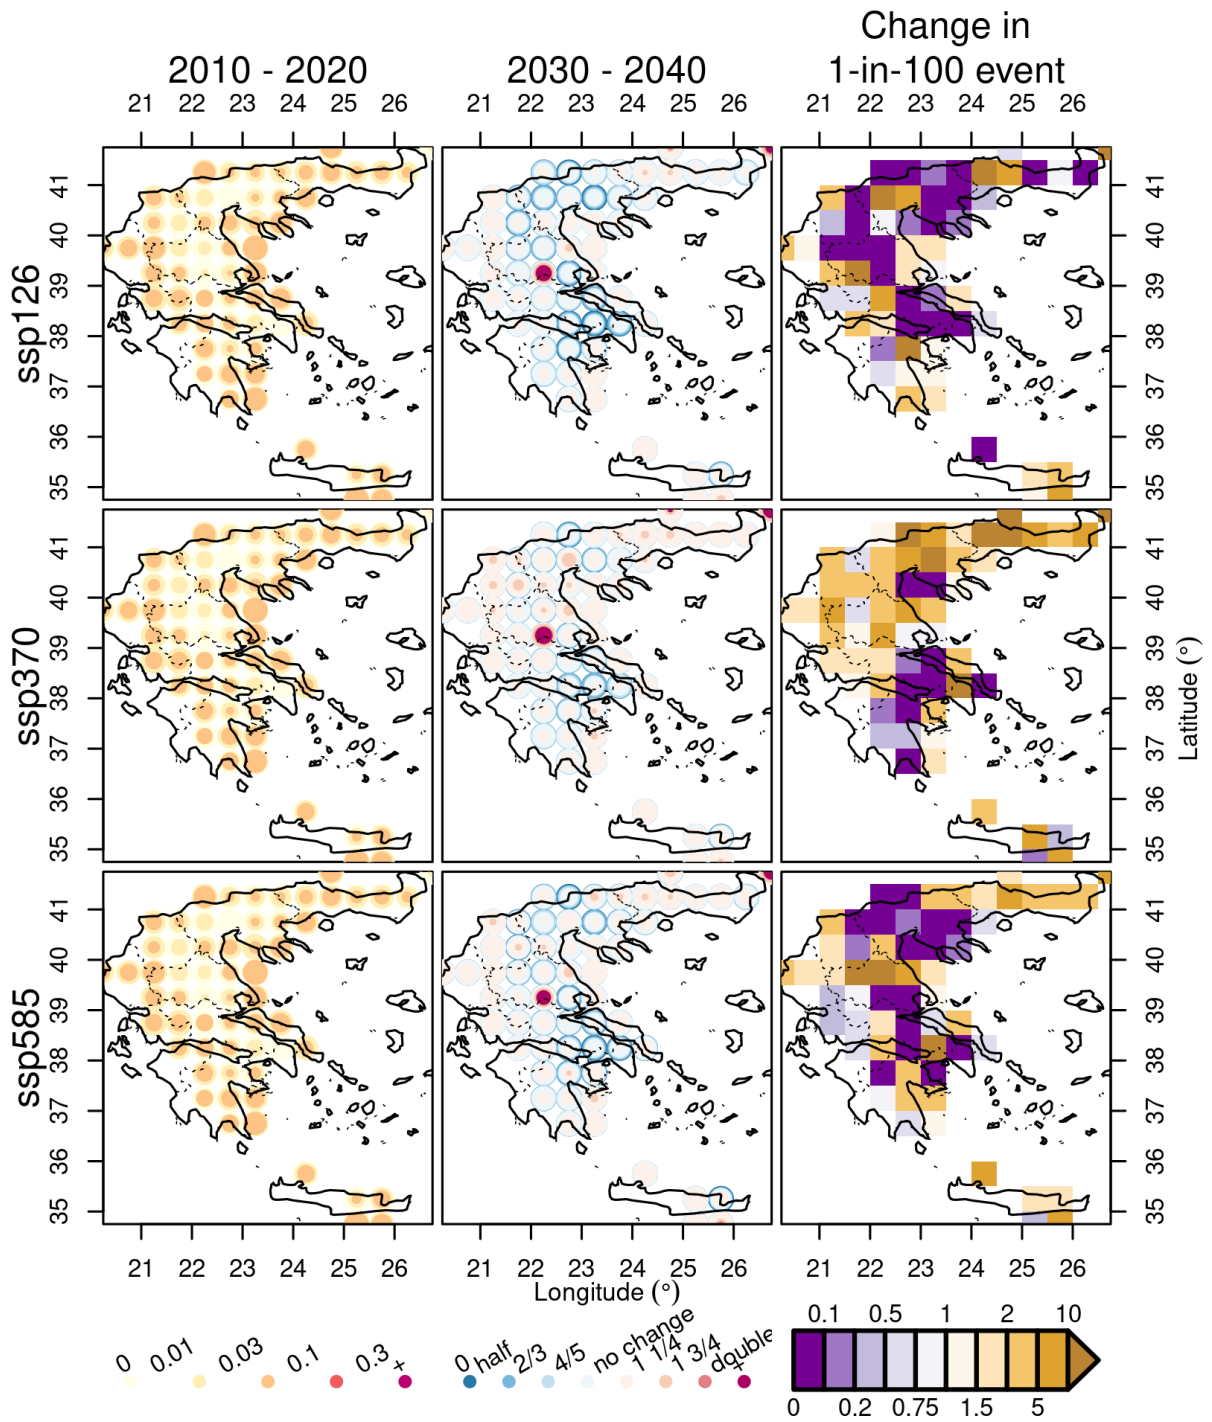

141  
142  
143

Figure S19: Same as Figure 19 but covering 2030-2040

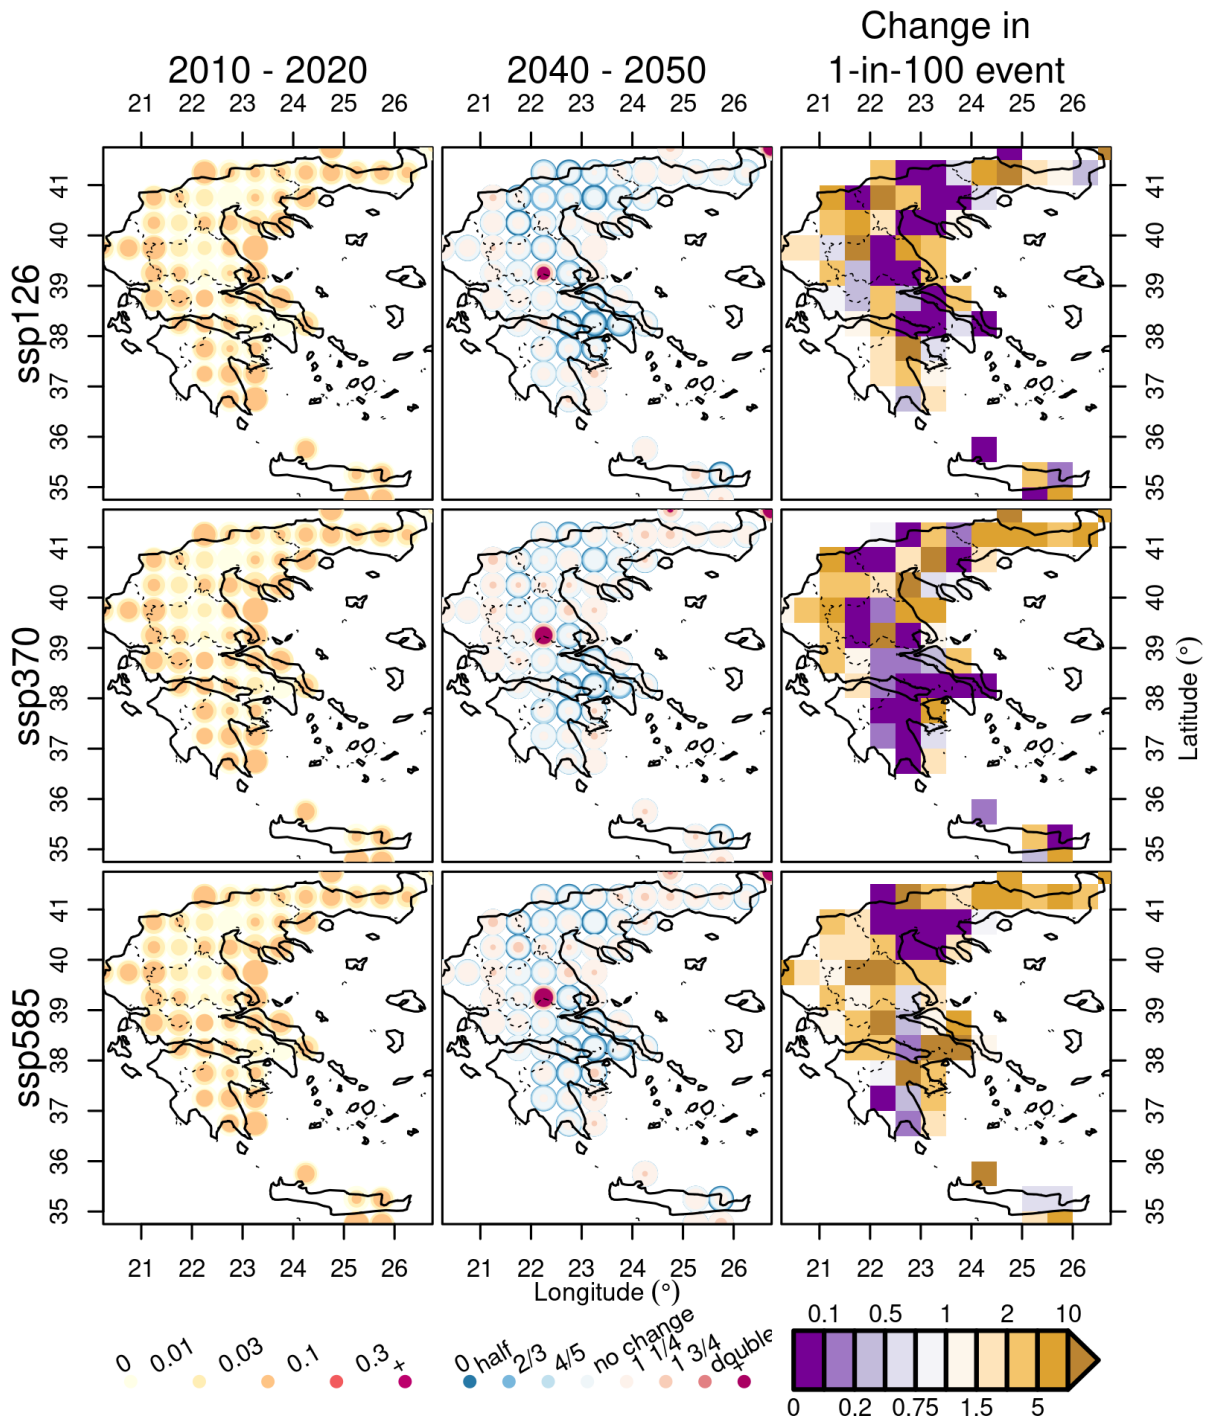

144  
145  
146  
147

**Figure S20:** Same as Figure 19 but covering 2040-2050

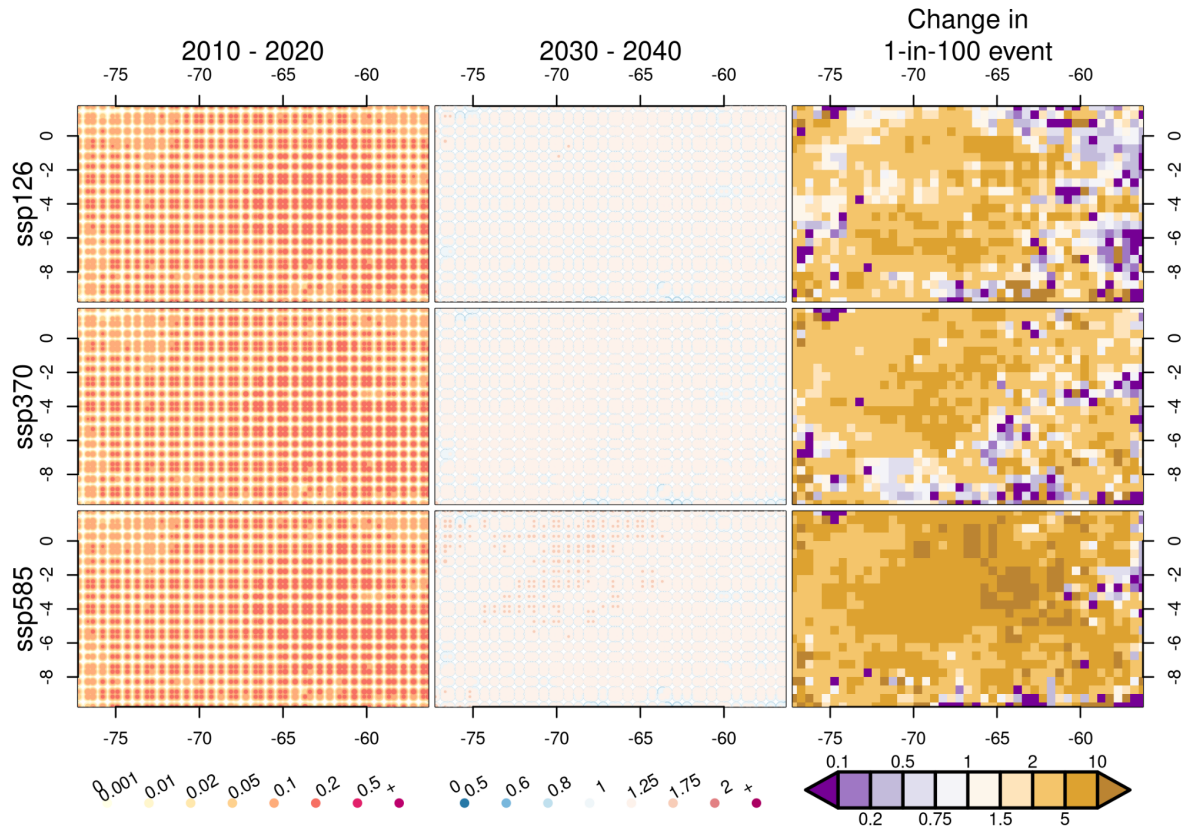

149  
150  
151  
152

**Figure S21:** Same as **Figure 18** but Western Amazonia covering 2030-2040 August-October.

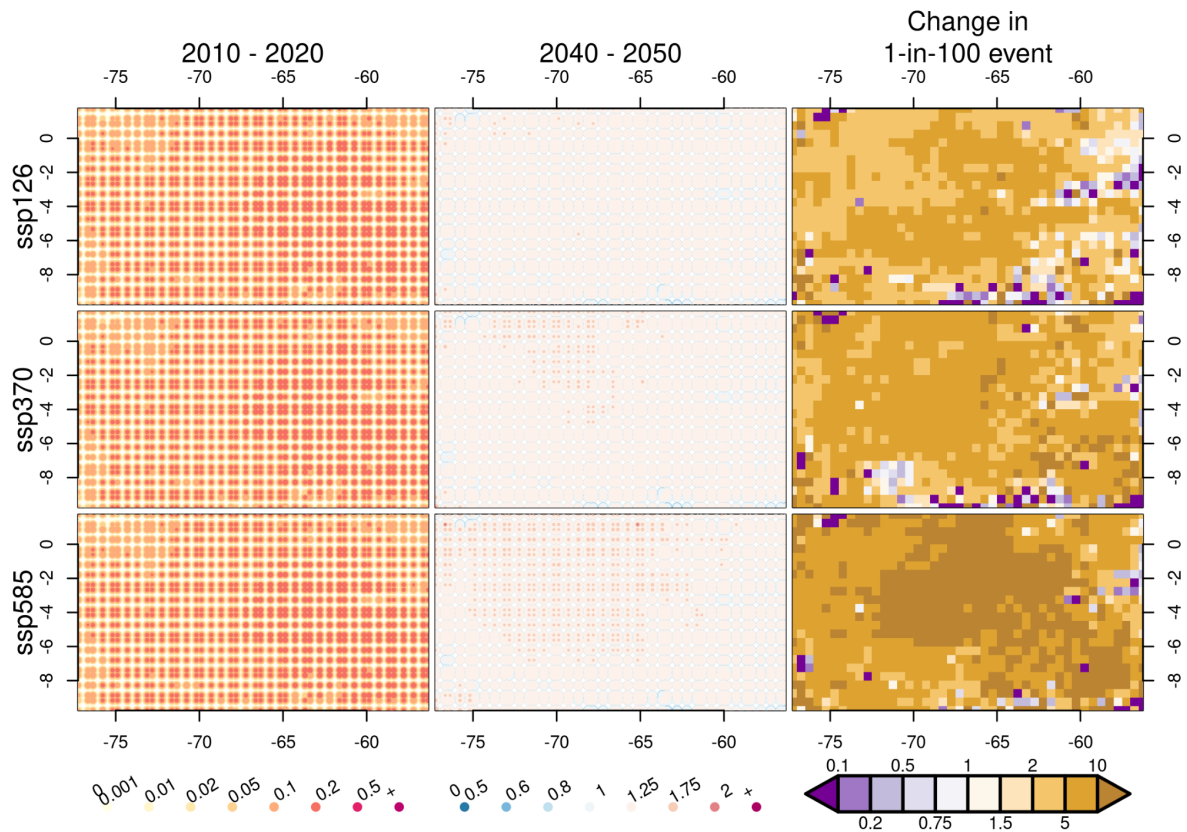

153  
154

**Figure S22:** Same as **Figure S21** but covering 2040-2050

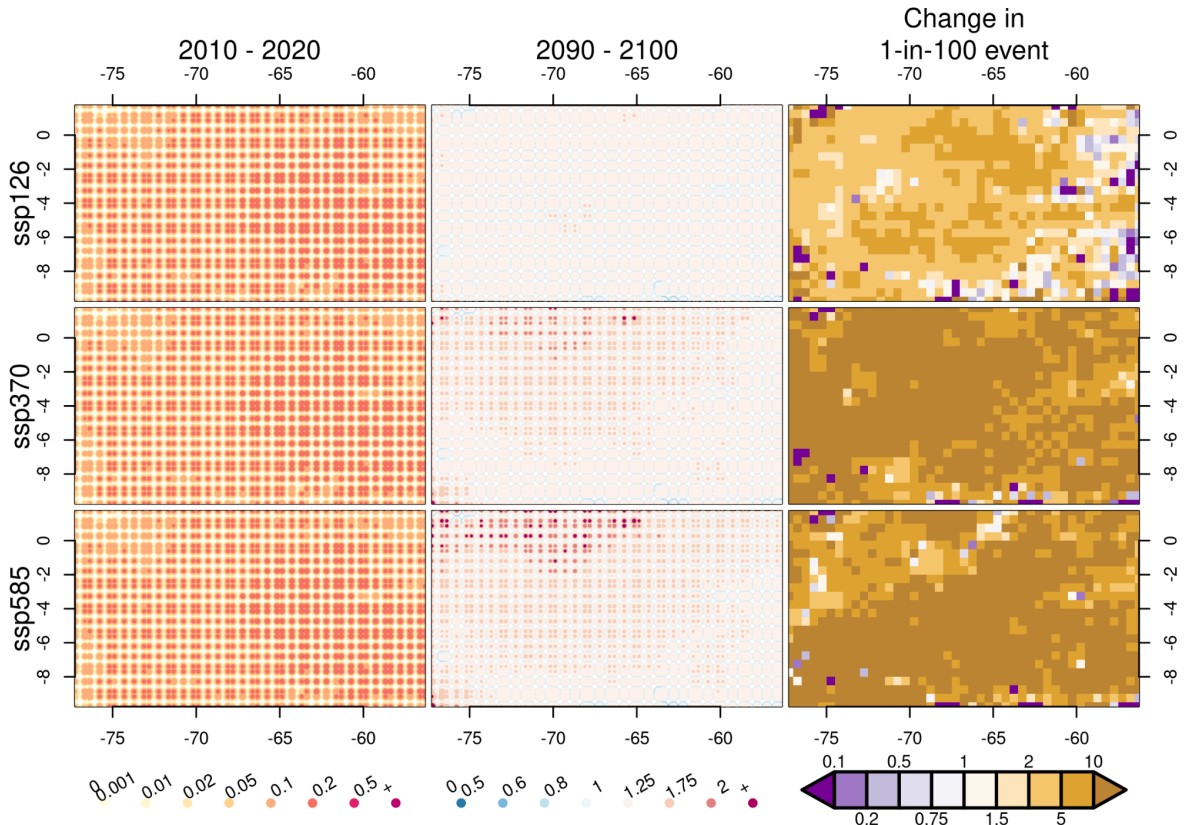

156  
157  
158  
159

Figure S23: Same as Figure S21 but for 2090-2100.

**Canada Fire Activity & Prediction Spread 2023**

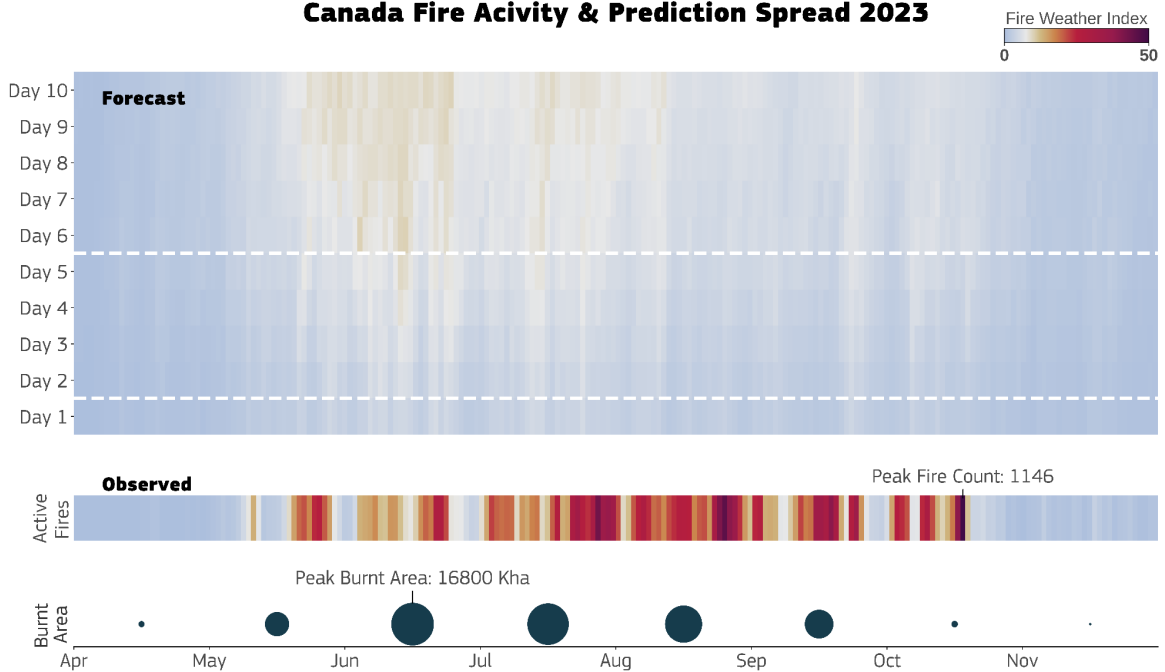

160  
161  
162  
163  
164

Figure S24: Ensemble spread in the prediction of the FWI in the first 10 days of forecast for Canada. The horizontal lines indicate changes in temporal resolution in the ECMWF weather forecasting systems. The spread accounts for as much as 10%-15% of the predicted values and, as expected, increases with lead time.

165

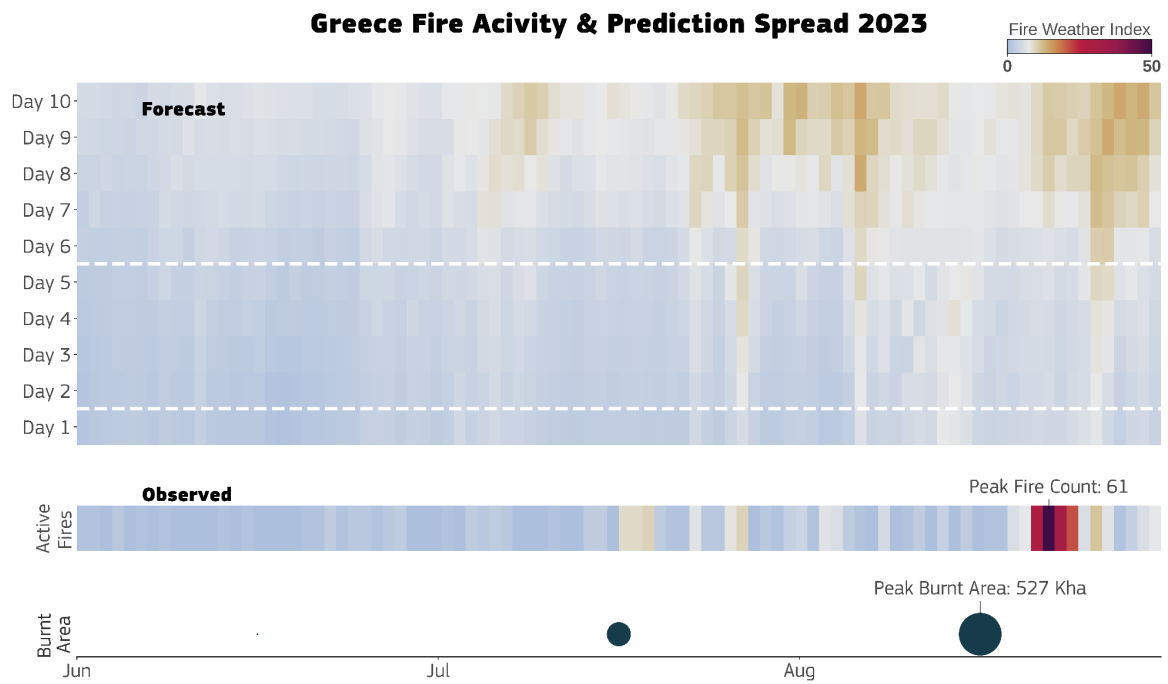

166

167 **Figure S25:** Same as **Figure S24** but for Greece.

168

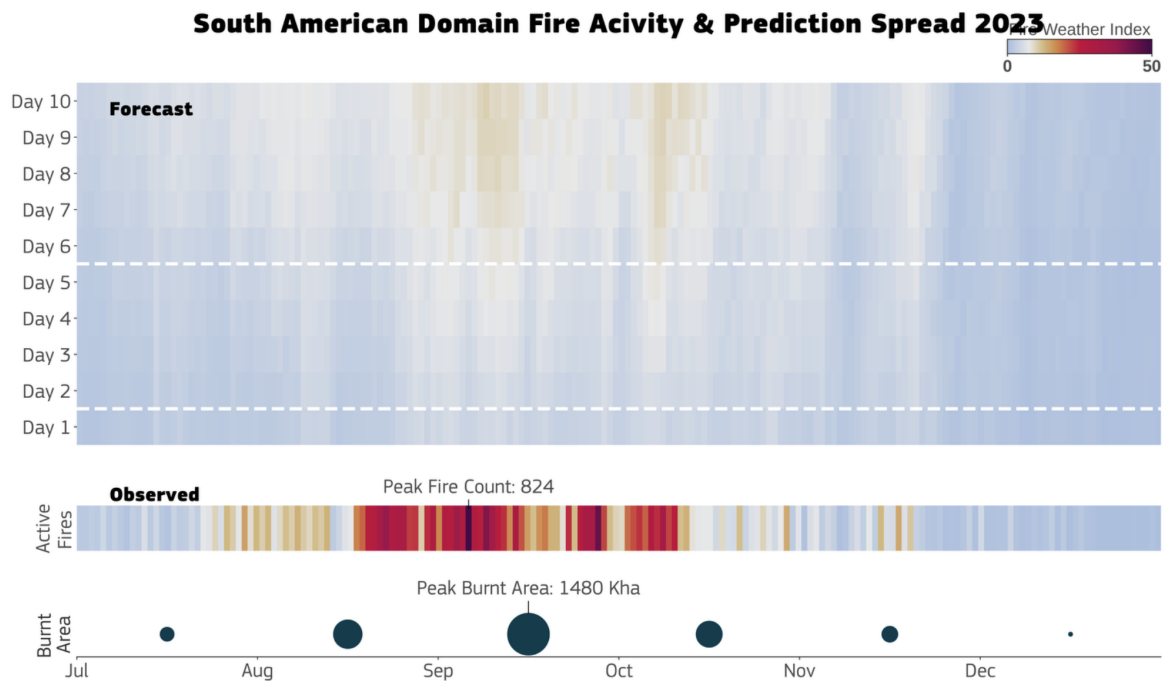

169

170 **Figure S26:** Same as **Figure S24** but for Western Amazonia.

171

172

173

174

175

176



177 **Table S1:** Overall PoF driver statistics summary from **Figure 9**. Values refer to variance in  
 178 active fire counts explained by each control.

|                | Canada                             | Greece      | Western Amazonia               | Target       |
|----------------|------------------------------------|-------------|--------------------------------|--------------|
| Weather        | 43% (Early May)<br>25% (June-July) | 20%(August) | 42% (August)<br>22% (Sept-Oct) | Active fires |
| Fuel dryness   | 13% (Early May)<br>11% (June-July) | 9%(August)  | 26% (August)<br>10% (Sept-Oct) |              |
| Fuel Abundance | 14% (Early May)<br>12% (June-July) | 11%(August) | 22% (August)<br>22% (Sept-Oct) |              |
| Others         | 29% (Early May)<br>52% (June-July) | 60%(August) | 10%(August)<br>46%(Sept-Oct)   |              |

179 **Table S2:** Overall ConFire driver statistics summary from **Figure 10**. Values refer to the  
 180 median and 5<sup>th</sup>-90<sup>th</sup> percentile range of anomalies in burned area caused by each control.  
 181

|                | Canada                                            | Greece                     | Western Amazonia                                       | Target                 |
|----------------|---------------------------------------------------|----------------------------|--------------------------------------------------------|------------------------|
| Weather        | 19[5-45]% (May)<br>16[1-100]%<br>(June-July)      | 24[4-140] %<br>(August)    | 14[1-140]%<br>(August)<br>29[2-45]% (Sept-<br>Oct)     | Burned Area<br>Anomaly |
| Fuel dryness   | 6[-41-65]%<br>(May)<br>9[-110-88]%<br>(June-July) | -11[-170-21]%<br>(August)  | 340[79-400]%<br>(August)<br>100[62-370]%<br>(Sept-Oct) |                        |
| Fuel Abundance | -1[-7- 0]% (May)<br>1[-3.9- 3.3]%<br>(June-July)  | 7.5[1-72]%<br>(August)     | 3[-0-16]%<br>(August)<br>0 [-1-3.6]% (Sept-<br>Oct)    |                        |
| Humans         | 5[1-97]% (May)<br>-0[-25-4]%<br>(June-July)       | 19[-33 - 220]%<br>(August) | 8[1-68]%<br>(August)<br>3[-1-20]% (Sept-<br>Oct)       |                        |

182  
 183  
 184

## 185 S1. Extended Methods

186

### 187 S1.1 Data and Data Processing

188

#### 189 S1.1.1 ConFire vegetation fraction driving data

190

191 In **Section 2.4.4.1**, we drive ConFire with tree and non-tree vegetated cover from the Joint UK  
192 Land Environment Simulator Earth System impacts model (JULES-ES) at version 5.5 (Clark  
193 et al., 2011; Mathison et al., 2023) driven with GSWP3-W5E5 forcings provided at a 0.5°  
194 spatial resolution by ISIMIP3a. These runs are freely available at  
195 <https://www.isimip.org/impactmodels/details/292/>. JULES-ES dynamically models vegetation  
196 cover in response to meteorology, hydrology, nitrogen availability, and land use change.  
197 JULES-ES has been extensively evaluated against snapshots and site-based measurements  
198 of vegetation cover and carbon (Mathison et al., 2023; Burton et al., 2022; Clark et al., 2011;  
199 Burton et al., 2019; Sellar et al., 2019). JULES-ES-ISIMIP has previously been used as driving  
200 data for ConFire to perform future projections (UNEP et al., 2022), though using a previous  
201 round of ISIMIP climate forcing (ISIMIP2b). As per (UNEP et al., 2022), vegetation responses  
202 to JULES-ES’s internal fire model were turned off so as not to double-count the effects of  
203 burning. However, in (UNEP et al., 2022), residual JULES-ES simulated biases in vegetation  
204 cover were allowed to persist, increasing the uncertainty range of local vegetation cover and  
205 resultant burned area responses. We therefore correct the bias in JULES-ES’s vegetation  
206 cover using a trend-preserving empirical quantile mapping bias adjustment method,  
207 implemented using the *ibicus* software package (Spuler et al., 2024). The bias adjustment  
208 method calibrates a mapping between the empirical cumulative distribution function of each  
209 surface cover type at each grid cell derived from the JULES-ES model output and the  
210 corresponding quantiles in the MODIS remote sensed data at this grid cell over the reference  
211 period (2003-2019). The method corrects the bias induced by the JULES-ES model rather  
212 than the bias of the climate model, assuming that this has been removed by the ISIMIP3BASD  
213 method (Lange, 2019).

214

215 The bias adjustment approach maps the empirical cumulative distribution function of each  
216 surface cover type at each grid cell derived from the JULES-ES model output to the  
217 corresponding quantiles in the MODIS VCF collection 6.1 remote sensed data (DiMiceli et al.,  
218 2017) at this grid cell over the reference period (2002-2019). For Canada, where collection  
219 6.1 does not extend north of 60DEG, we used collection 6 (Dimiceli and Others, 2015). This  
220 mapping is subsequently applied to the surface information output from JULES-ES driven by  
221 climate models over the historical (1994-2014) and future (2015-2099) period. To preserve  
222 the trend in the vegetation cover over the future periods, additive detrending of the mean is  
223 applied:

224

$$225 \quad x_{cm\_fut} \rightarrow F_{obs}^{-1}(F_{cm\_ref}(x_{cm\_fut} + \bar{x}_{cm\_ref} + \bar{x}_{cm\_fut})) + \bar{x}_{cm\_fut} - \bar{x}_{cm\_ref} \quad (1)$$

226

227 Here  $F_{cm\_ref}$  is the empirical cumulative distribution of the model over the reference period,  
228  $F_{obs}^{-1}$  the inverse cumulative distribution function of the observations,  $x_{cm\_fur}$  the quantile that  
229 is adjusted and  $\bar{x}_{cm\_ref}$  and  $\bar{x}_{cm\_fur}$  the means of the model output over the reference and  
230 future periods. This mapping is applied over a rolling window of 9 years over the future period.

231

232 The approach ensures that not only the mean but also the shape of the distribution is corrected  
233 without assuming a parametric form, whilst also preserving additive trends driven by the future  
234 climate model. Furthermore ensures continuity between the historical and future period by  
235 using a rolling window over the future period.

236  
237 The results were evaluated in terms of the ability of the bias correction method to reduce the  
238 model bias over the historical period, as well as preserve the trend between the future and  
239 historical period. It was found that the method corrects the bias well over the historical period  
240 for most regions, variables and gridcells in both the mean and 80th percentile at each grid cell.  
241 The trend between the future and historical period is well preserved in most regions and  
242 gridcells, with less than 0.1% of gridcells overall experiencing an absolute trend modification  
243 larger than 5%.

244  
245 To demonstrate the evaluation conducted, **Figure S24** shows the results for treecover over  
246 North-Western Canada. The plots for the remaining regions, including tree and no-tree cover,  
247 can be found in a notebook <https://github.com/jakobwes/State-of-Wildfires---Bias-Adjustment>.  
248 Investigating the timeseries of average treecover over the region, we find that the correction  
249 method reduces the bias over the historical period and matches the future period to the  
250 historical period (**Figure S24a**). The cumulative distribution functions of average tree cover  
251 merged over all spatial locations in observations and model match better after bias adjustment  
252 (**Figure S24b**). They do not match perfectly, and we note that this is a non-calibrated aspect  
253 that we do not expect to have zero bias but that is important to evaluate. Furthermore, we find  
254 that the improvement in both mean and 80th percentile hold across the region (**Figure 19c**).  
255 The trend between future and historical period is preserved for the majority of grid-cells, with  
256 the absolute change in trend being close to zero for most grid-cells.

257

## Evaluation of bias correction results for the JULES vegetation model over North-Western Canada

a) Timeseries of total tree cover of the area. MODIS VCF collection 6 in black. Raw model in solid lines, bias corrected model in dashed lines.

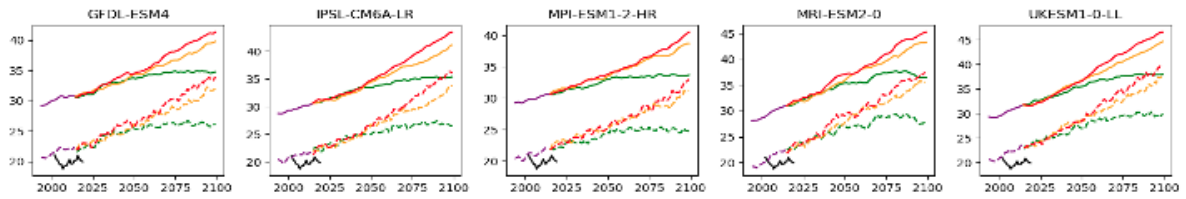

b) Cumulative distribution function across the region and historical time period.

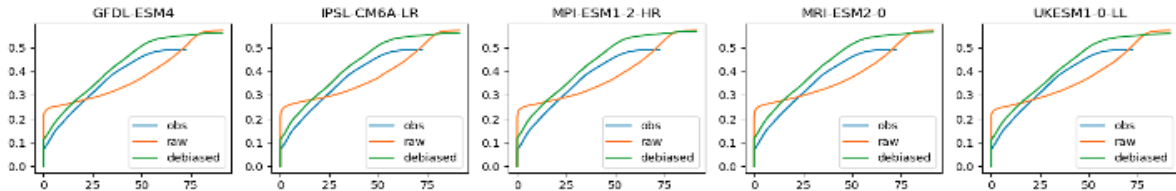

c) Absolute model bias in mean and 80<sup>th</sup> percentile at each grid cells before (left two plots) and after (right two plots) bias correction.

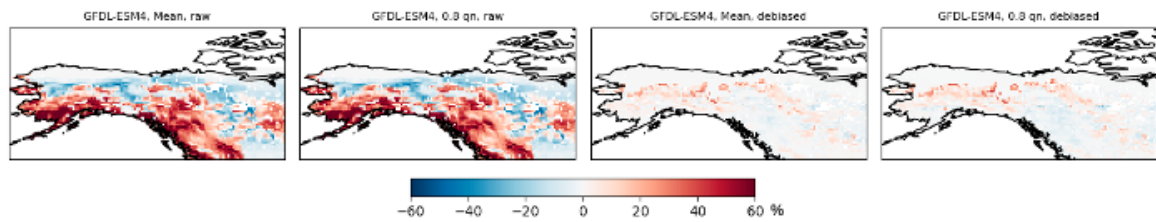

d) Absolute difference in trend between future and historical period between raw and bias corrected model.

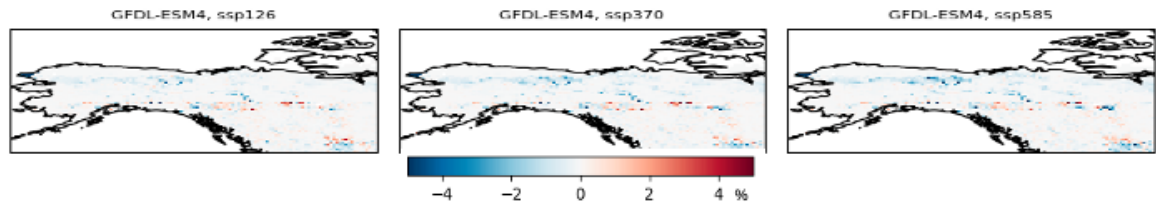

258

259

260

261

262

263

264

265

266

267

268

269

270

271

### S1.2 Modelling Frameworks

272

273

#### S1.2.1 PoF

274

275

276

277

278

279

280

281

The Probability of Fire (PoF) system uses gradient-boosted decision trees to provide a probability forecast of active fire occurrence (McNorton and Di Giuseppe, 2024). The supervised algorithm which trains an ensemble of decision trees uses regularization techniques to prevent overfitting (Chen & Guestrin, 2016). The training, based on 2010-2014 MODIS active fire detections, classifies a positive fire event as any detection within a 9 km grid cell.

282 The relative contribution of each input control to the model prediction is evaluated using  
 283 Shapley values, computed using the Shapley Additive exPlanations python library (Lundberg  
 284 & Lee, 2017). The SHAP value indicates the importance of each feature in a model, where a  
 285 positive SHAP value reflects a positive impact on the model prediction and a negative SHAP  
 286 value reflects a negative impact. Specifically for this study we use the TreeExplainer, which  
 287 computes the SHAP values by interrogating the structure of the decision trees within the model  
 288 based on the input feature values. The probability controls are then normalised and grouped  
 289 into the four categories given in **Table 3** of the main text. By combining these with the total  
 290 amount of fires predicted for a given area we can attribute those fires into one of the four  
 291 controls. The ‘Other’ control also includes fire occurrences not predicted by the model. This is  
 292 computed given by:

$$294 \quad \text{Other} = \text{SHAP}[\text{Other}] + \max(0, \text{Area\_Total\_Fires\_Observed} \\ 295 \quad \quad \quad - \text{Area\_Total\_Fires\_Predicted}) \quad (2)$$

298 Where,  $\text{SHAP}[\text{Other}]$ , is the contribution of the ‘Other’ control to the total predicted fires for a  
 299 given region and,  $\text{Area\_Total\_Fires\_Observed}$  and  $\text{Area\_Total\_Fires\_Predicted}$  are the total  
 300 number of observed and predicted fires for the same region.

### 302 S1.2.2 ConFire

304 ConFire is a burned area attribution tool, used for trend detection and attribution (Kelley et al.,  
 305 2019), event attribution (Kelley et al., 2021) and future projections (UNEP et al., 2022).  
 306 ConFire finds the likelihood of causes of or changes in BA by optimising a simple, semi-  
 307 empirical process representation model by applying Bayes Theorem. In our case, Bayes  
 308 Theorem states that the likelihood of a model configuration described by a parameter set  $\{\beta\}$   
 309 and monthly explanatory variables (i.e model driving data)  $\{X_{iv}\}$  given some training  
 310 observation of monthly burned area fraction  $\{Obs_i\}$  from MODIS MCD64A1, for cells  $i$ , is  
 311 proportional to the prior probability of  $\{\beta\}$  ( $P(\{\beta\})$ ) multiplied by the probability of the  
 312 observations given that model configuration:

$$313 \quad P(\{\beta\}|\{Obs_i\}, \{X_{iv}\}) \propto P(\{\beta\}) \times P(\{Obs_i\} | \{X_v\}, \{\beta\}) \quad (3)$$

315 We use the zero-inflated logit distribution introduced by (Kelley et al., 2021) as our update  
 316 distribution, as this is specifically designed to better represent the tails of the distribution during  
 317 fire events:

$$318 \quad P(\{Obs_i\} | \{X_{iv}\}, \{\beta\}) = \prod_i^N P(Obs_i | \{X_v\}_i, \{\beta\})$$

$$319 \quad P(Obs_i = 0 | \{X_v\}_i, \{\beta\}) = (1 - M(\{X_v\}_i, \{\beta_M\})^{P_1}) \times (1 - P_0) \\ 320 \quad P(Obs_i > 0 | \{X_v\}_i, \{\beta\}) \\ 321 \quad = (1 - P(Obs_i = 0 | \{\beta\})) \times \mathfrak{N}(\text{logit}(Obs_i) - \text{logit}(M(\{X_v\}_i, \{\beta_M\})), \sigma) \quad (4)$$

322 where  $\{\beta_M\}$  is the set of parameters related solely to the underlying model,  $M$ ,  $\text{logit}(x) =$   
 323  $\text{log}\left(\frac{x}{1-x}\right)$ ,  $P_0$ ,  $P_1$  and  $\sigma$  are parameters within the full set  $\{\beta\}$  which describe the model error  
 324 and  $\mathfrak{N}(\mu, sd)$  is a normal distribution with mean of  $\mu$  and standard deviation of  $sd$ .

328 The model,  $M$ , simulates fractional BA (fraction) via a number of controls. For attribution and  
 329 outlook, these controls follow (Kelley et al., 2021; Burton et al., 2019): Fuel load, fuel moisture,  
 330 ignitions and suppressions. This follows the general model structure of global fire models  
 331 (Hantson et al., 2016; Rabin et al., 2017) and is most appropriate for looking at long term,  
 332 coarse fire drivers (Moritz et al., 2005). For driver assessment, we separate out an additional

333 control for “fire weather” and introduce a “snow cover” control. Model BA is the product of  
 334 these controls,  $c$ :

$$335$$

$$336 M(\{X_v\}, \{\beta_M\}) = F_{max} \times \prod_c f(\{X_c\}, \{\beta_c\}) \quad (5)$$

$$337$$

338 Where  $F_{max}$  describes maximum monthly burned area fraction and is an optimizable  
 339 parameter in set  $\{\beta_M\}$ ,  $\{X_c\}$  are the BA driving variables,  $\{\beta_c\}$  the parameters related to control  
 340  $c$  and  $f$  is the function that describes the control influence on BA. Each control describes the  
 341 expected BA if all other controls imposed no limitation on burning - for example, when  $c$  is fuel,  
 342  $f(\{X_c\}, \{\beta_c\})$  describes the BA in perfectly dry conditions with saturated ignitions and no  
 343 suppression. To achieve this,  $f$  is the logical function:

$$344$$

$$345 f(\{X_c\}, \{\beta_c\}) = 1 / \left( 1 - \exp(-\beta_{c,0} - \sum_j \beta_{c,j} \times X_j) \right) \quad (6)$$

$$346$$

347  
 348 where  $\beta_{c,j}$  is the contribution of driving variable  $X_j$  to the control and  $-\beta_{c,0}$  is a parameter that  
 349 can shift the midpoint of the sigmoid curve.

350  
 351 All variables  $X_v$  where normalised to be between  $[0, 1]$  based on the training data to aid priors  
 352 selection and optimization - though analytically this should have no impact on our results. Our  
 353 priors fix the direction each drive can influence a control (drivers and direction are listed in  
 354 Table 3 and 5) but beyond this relatively uninformed. Priors for  $\beta_{c,j}$  where described by a log-  
 355 normal distribution with a  $\mu$  of 0 and  $\sigma$  of 10, and set to be positive for liberative drivers (one  
 356 that increases the strength of a control) and negative for suppressive (ones that reduce the  
 357 strength of a control).  $\beta_{c,0}$  priors were set to a normal distribution with a mean of 0.5 and a  
 358 standard deviation of 1.  $F_{max}$  and  $P_0$  priors were set as a uniform distribution between 0 and  
 359 1  $\sigma$  was set to a half-normal with mean of 0 and standard deviation of 10.

360  
 361 We sampled the posterior distribution using Bayesian inference following a similar protocol  
 362 to (Barbosa, 2024) with the pymc python package version 5 (Abril-Pla et al., 2023),  
 363 employing 100 chains each over 1000 warm-up iterations (that were not subsequently used)  
 364 and 100 sample iterations using the No-U-Turns Hamilton Monte Carlo sampler (Hoffman  
 365 and Gelman, 2011) while utilising 50 % of the data or a minimum of 6000 grid cells. To  
 366 sample the posterior distribution, we then randomly sample 50 iterations from each chain,  
 367 thereby approximating the posterior with 1000 ensemble members. As per Barbosa (2024),  
 368 for evaluation (**Figure S28-S39**) we trained the first half of the period and tested on the  
 369 second half. For the rest of the results, we trained on the full period.

370  
 371 We obtaining probability distributions from the model posterior for our results, ConFire offers  
 372 two probability, which we have adapted slightly from (2021) :

- 373
- 374 1. The likelihood of different levels of burning for a specific event (i.e a grid cell in a  
 375 given timestep) which considers uncertainty explained by the model and residual  
 376 uncertainty described by our error parameter,  $\sigma$ . We use this when we are  
 377 comparing a single grid of cells and months, such as for evaluation, and for  
 378 assessing the un. The likelihood of a Burned Area,  $BA$ , under drivers,  $X$ , which can  
 379 be out-of-training sample, is:

$$380$$

$$381 P(BA | (X_v, \beta | \{Obs_i\}, \{X_{iv}\})) = \int_{\beta} P(\beta | \{Obs_i\}, \{X_{iv}\}) \times P(BA | \beta) d\beta \quad (7)$$

$$382$$

383 Where  $P(BA | \beta)$  is take from equation 4.

384

385 When building distributions for multiple grid cells or time periods, as with building a  
 386 climatology in **Section 3**, we convolute the probability distributions of individual time  
 387 periods and cells following equations in (Kelley et al., 2021). Converting probabilities  
 388 over a large number of cells gives us the second measure.  
 389

390 The emergent probability of different mean levels of BA over many events explained directly  
 391 by the model and its driving variables. We use this when assessing the emergent likelihood  
 392 of burning in **Section 4** and **Section 5**. This is the same as taking the mean of  $n$  simulations  
 393 in equation 7 as  $n$  tends to infinity. Doing this,  $P(\{Obs_i\} | \{X_{iv}\}, \{\beta\})$  from equation 4 will tend  
 394 towards a BA of model  $M$  output weighted by the likelihood of a zero BA:  
 395

$$396 \quad D(BA) = \lim_{n \rightarrow \infty} \left[ \sum_{i=1}^n P(BA | (X_v, \beta | \{Obs_i\}, \{X_{iv}\})) / n \right]$$

397 2.

$$398 \quad = \int_{\beta} M(\{X_v\}_i, \{\beta_M\}) \times (1 - M(\{X_v\}_i, \{\beta_M\})^2) \times (1 - P_0) d\beta \quad (8)$$

399 For attribution and future projections, ConFire produces correctly ranked by consistently  
 400 biased probability distributions (**Supplement Section “Change in Likelihood of High  
 401 Burned Area in 2023 due to Total Climate Forcing and Socioeconomic factors”**). The  
 402 final step is therefore to introduce a correction factor. As this distribution bias is constant  
 403 across the observed BA distribution, a simple scaling factor is all that's needed. To do this,  
 404 we assign the likelihood associated with the BA in equation 8 with a scaled burned area  
 405 ( $BA^*$ ) so that the mean of the sample distribution matches the mean of the observation for  
 406 the period 2003-2019.  
 407

$$408 \quad BA^* = BA \times \Sigma(\{Obs_i\}) / \int_0^1 D(BA) \times BA dBA \quad (9)$$

409  
 410  $BA^*$  is then used in equation 8.  
 411

### 412 **S1.2.3 Attributing Fire Weather**

413

#### 414 Bias Correction

415 We evaluated the individual variables in the FWI (see evaluation), and found that each variable  
 416 was slightly biased compared to ERA5 reanalysis. We therefore applied a bias correction to  
 417 the final FWI, rather than bias-correcting each individual variable.  
 418

419 We bias-corrected the HadGEM3 2023 large ensemble based on a bias assessment of the 15  
 420 historical members from 1960-2013 vs. ERA5 observation-driven FWI, using a simple linear  
 421 regression on  $fwi$  transformed using:  
 422

$$423 \quad fwi_* = \log(\exp(fwi) - 1) \quad (10)$$

424 to remove the physical bound at 0. We use this instead of using a straight  $\log$  transformation  
 425 as it ensures numerical stability at higher values, crucial when dealing with extreme FWI  
 426 values, thereby avoiding blow-up effects. It also preserves the extreme tail of the FWI  
 427 distribution, allowing us to accurately capture and analyse critical events associated with high  
 428 fire risk..  
 429

430 We perform a simple linear regression on ERA5 and on each historical member to obtain the  
 431 basic regression parameters:

$$432 \quad fwi_* \sim fwi_{*,0} + \Delta_{fwi} \times t \quad (11)$$

433 Where  $t$  is time, and  $t = 0$  is set to 2023,  $\Delta_{fwi}$  is the rate of change, or trend, of  $fwi_*$  and  $fwi_{*,0}$   
 434 is the estimated  $fwi_*$  for 2023. Our bias correction is therefore based on present-day levels of  
 435 warming, taking account of the additional warming from 2013-2023 (assuming the trend from  
 436 1960-2013 continues to 2023 linearly). If anything this is likely conservative given that warming  
 437 rates may have increased more rapidly in the last 10 years.

438  
 439 We generate the bias-corrected 2023 ensemble by correcting each of the 525 present-day  
 440 ensemble members against each of the 15 historical members (creating an ensemble of 7875  
 441 members). Due to the perturbation procedure used to generate the 2023 ensemble from the  
 442 historic (Ciavarella et al., 2018), we can not assume that present-day members pair to  
 443 historical members. We therefore iterate over all possible pairs:  
 444

$$445 \quad fwi_{corrected} = (fwi_{*i} - fwi_{*,0,j}) \times \sigma(fwi_{*era5}) / \sigma(fwi_{*j}) + fwi_{0,*era5} \quad (12)$$

$$446 \quad \sigma_{\Delta}(fwi_{*}) = sdev(fwi_{*} - \Delta_{fwi} \times t)$$

448 Where  $i$  is a present-day ensemble member, and  $j$  is a historical member.

449  
 450 We finish by applying the inverse of the transformation from equation 10 :

$$451 \quad fwi_{corrected} = \log(\exp(fwi_{*,corrected}) + 1) \quad (13)$$

#### 454 Probability Ratio

455 We use the ERA5 2023 FWI for our event threshold in each region, using the month of peak  
 456 anomaly from **Figure S2** in each region. We use this threshold to calculate the probability ratio  
 457 (PR) of the event occurring with and without climate change. To calculate the PR, we find the  
 458 number of ensemble members that exceed the 2023 ERA5 FWI value in the bias-corrected  
 459 ALL simulation, and divide this by the number of members that exceed the same value in the  
 460 bias-corrected NAT simulation, bootstrapping 10,000 times to giving the probability of  
 461 exceeding the observed 2023 FWI value in a world with and without climate change plus  
 462 uncertainty bound for the 5-95th percentile.

$$463 \quad PR = p(ALL) / p(NAT)$$

#### 465 S1.2.4 FireMIP

466  
 467 For the multi-model ensemble we use simulations from the ISIMIP3a fire sector, as published  
 468 in (Burton & Lampe et al. 2023). The 7 models reporting BA for ISIMIP3a are shown in the  
 469 table below. The methodology follows the ISIMIP3a Impacts Attribution protocol, as outlined  
 470 in (Mengel et al., 2021), where the factual historical simulations are driven with GSWP3-W5E5  
 471 reanalysis data, and the counterfactual simulations are the same historical data which has  
 472 been detrended via quantile mapping (Mengel et al., 2021).

473  
 474 As outlined in (Hantson et al., 2016), the spread in the absolute BA is large amongst the  
 475 observations, models and regions and therefore a normalised relative anomaly (RA) rather  
 476 than absolute BA is used for the analysis. To calculate the RA in present day BA, we subtract  
 477 the counterfactual mean, and divide by the counterfactual mean. By comparing both factual  
 478 and counterfactual experiments to the counterfactual mean, we are looking at the fractional  
 479 increase in BA driven by climate change compared to a baseline without climate change.  
 480 Based on model performance by AR6 region, a region-specific weighting is also applied  
 481 following (Knutti et al., 2017). The weighting is based on the model's distance to the observed  
 482 BA temporal RA using both FireCCI5.1 and GFED5, measured using NME as per (Kelley et



483 al., 2013). To measure the uncertainty, random noise is generated and scaled by the  
484 climatological RMSE of each model. This noise is then added to the modelled relative  
485 anomaly, this process is repeated 1000 times. This performs the same function and the  
486 uncertainty quantification from model error as Equation 4 does for ConFire. Then,  
487 bootstrapping is applied to the monthly regional BA RA (now with noise added in) according  
488 to the weight for each model. Uncertainty is calculated by taking the 2.5-97.5<sup>th</sup> percentile of  
489 the resultant histogram. All results are reported as P50 [P2.5, P97.5]. The methods are  
490 explained in full in (Burton & Lampe et al. 2023).

**Table S3:** FireMIP Models used for attributing median burned area. Table reproduced from (Burton & Lampe et al. 2023)

| Model                    |                      | CLASSIC               | INFERNO                                         | LPJ-GUESS-SIMFIRE-BLAZE                                                             | LPJ-GUESS-SPITFIRE   | ORCHIDEE-MICT-SPITFIRE | SSiB4/TRIFFID         | VISIT                               |
|--------------------------|----------------------|-----------------------|-------------------------------------------------|-------------------------------------------------------------------------------------|----------------------|------------------------|-----------------------|-------------------------------------|
| <b>Fire Model</b>        |                      | CLASSIC               | INFERNO                                         | SIMFIRE                                                                             | SPITFIRE             | SPITFIRE               | Li                    | After (Thonicke et al., 2001)       |
| <b>Land / Vegetation</b> |                      | CLASSIC               | JULES                                           | LPJ-GUESS                                                                           | LPJ-GUESS            | ORCHIDEE               | SSiB                  | VISIT                               |
| <b>Dynamic Veg</b>       | <b>Physiology</b>    | Yes                   | Yes, via TRIFFID                                | Yes                                                                                 | Yes                  | Yes                    | Yes, via TRIFFID      | Yes                                 |
|                          | <b>LAI</b>           | Yes                   | Yes, via TRIFFID                                | Yes                                                                                 | Yes                  | Yes                    | Yes                   | Yes                                 |
|                          | <b>Bio-geography</b> | No                    | Yes, via TRIFFID                                | Yes                                                                                 | Yes                  | Yes                    | Yes                   | No                                  |
| <b>Nitrogen Cycle</b>    |                      | Yes                   | Yes                                             | Yes                                                                                 | Yes                  | No                     | Yes                   | Yes, but C-N coupling is limited    |
| <b>No. PFTs</b>          |                      | 9                     | 13                                              | 17                                                                                  | 17                   | 19                     | 7                     | 33 (biome types)                    |
| <b>No. Soil Layers</b>   |                      | 20                    | 4                                               | 2                                                                                   | 2                    | 11                     | 3                     | 2                                   |
| <b>Fuel</b>              |                      | Vegetation and litter | Vegetation & top soil layer as proxy for litter | Vegetation, litter                                                                  | Litter               | Vegetation and litter  | Vegetation and litter | Litter                              |
| <b>Ignitions</b>         | <b>Natural</b>       | Prescribed lightning  | Prescribed lightning                            | SIMFIRE describes annual BA + fire-climatology -> daily BA used as Fire-Probability | Prescribed lightning | Prescribed lightning   | Prescribed lightning  | Probabilistic based on fuel wetness |

|                     |                      |                                                                                                                                       |                                                                                                                 |                                                                                              |                                                                                                                                  |                                                                                                                                     |                                                                                                                                                                  |                                                                      |
|---------------------|----------------------|---------------------------------------------------------------------------------------------------------------------------------------|-----------------------------------------------------------------------------------------------------------------|----------------------------------------------------------------------------------------------|----------------------------------------------------------------------------------------------------------------------------------|-------------------------------------------------------------------------------------------------------------------------------------|------------------------------------------------------------------------------------------------------------------------------------------------------------------|----------------------------------------------------------------------|
|                     | <b>Anthropogenic</b> | Prescribed population density                                                                                                         | Prescribed Population density                                                                                   | SIMFIRE includes suppression by humans                                                       | Prescribed population density                                                                                                    | Prescribed population density                                                                                                       | Prescribed population density                                                                                                                                    | No                                                                   |
| <b>Suppression</b>  |                      | Prescribed population density                                                                                                         | Crops, population density                                                                                       | Crops (100%), prescribed population density (Hyde3.1)                                        | Crops, population density                                                                                                        | Prescribed population density, crops                                                                                                | Prescribed population density and GDP                                                                                                                            | Low fuel load                                                        |
| <b>Spread</b>       |                      | Wind speed and soil moisture                                                                                                          | None                                                                                                            | Daily BA (no explicit spread)                                                                | Rothermel equations including wind speed, tree fraction, grass fraction, fuel moisture, fuel load and characteristics            | wind speed, tree fraction, grass fraction, fuel moisture, fuel load                                                                 | Wind speed and soil moisture                                                                                                                                     | None                                                                 |
| <b>Model inputs</b> |                      | SW & LW radiation, precipitation, air temperature, specific humidity, wind speed, atmospheric pressure, population density, lightning | SW & LW radiation, precipitation, air temperature, specific humidity, wind speed, population density, lightning | SW radiation, precipitation, air temperature (mean, min, max), relative humidity, wind speed | SW radiation, precipitation, air temperature, specific humidity, wind speed, atmospheric pressure, population density, lightning | SW & LW radiation, precipitation, air temperature, specific humidity, wind speed, atmospheric pressure, PFT map, population density | SW & LW radiation, precipitation, air temperature, specific humidity, wind speed, atmospheric pressure, population density, and GDP, peat map, land cover change | Air temperature, precipitation, air vapor pressure, cloudiness, wind |
| <b>Resolution</b>   |                      | 1 deg                                                                                                                                 | 0.5 deg                                                                                                         | 0.5 deg                                                                                      | 0.5 deg                                                                                                                          | 0.5 deg                                                                                                                             | 0.5 deg                                                                                                                                                          | 0.5 deg                                                              |
| <b>References</b>   |                      | (Melton et al., 2020)                                                                                                                 | (Burton et al., 2019, 2020; Mangeon et al., 2016)                                                               | (Rabin et al., 2017; Smith et al., 2014; Knorr et al., 2014)                                 | (Rabin et al., 2017; Smith et al., 2014; Thonicke et al., 2010; Lehsten et al., 2009)                                            | (Yue et al., 2014, 2015)                                                                                                            | (Huang et al., 2021, 2020; Li et al., 2012; Hugelius et al., 2013; Li et al., 2013)                                                                              | (Ito, 2019)                                                          |

493

494

## 495 S2. Evaluation

### 496 S2.1 POF

497

498 The PoF model, trained on observed fire activity, provides a daily probability of fire occurrence  
499 based on the input variables described in **Table 3** of the main text. The three cases explored  
500 in the main study can be visualised as fire risk maps at a 1 km resolution, higher than the 9  
501 km used for attribution. The 1km predictions show that whilst PoF often fails to capture the  
502 true total number of active fires, the relative attribution is likely to be accurate given by the  
503 models ability to capture the spatiotemporal pattern of fire activity reflected by the forecast  
504 danger shown in the figures below. Of the three case studies the model accurately reflects fire  
505 activity for Canada and Western Amazonia, and whilst high fire danger is modelled over  
506 Alexandroupolis, Greece, it fails to capture the severity of the event.

507

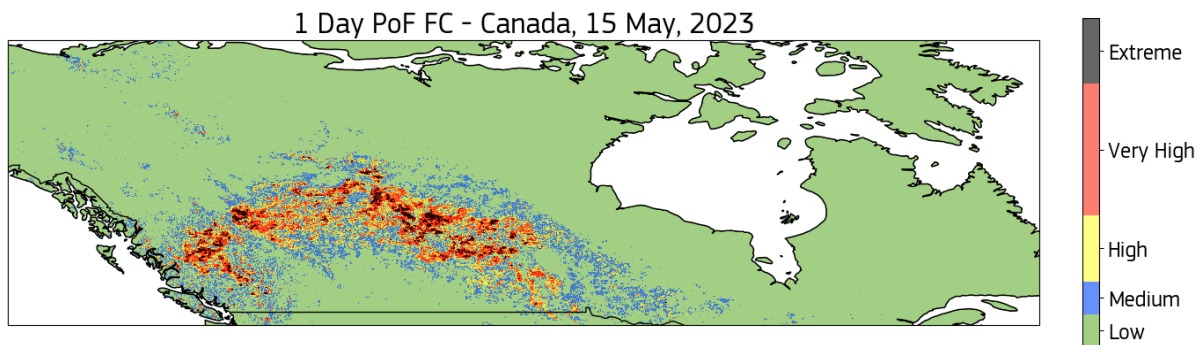

508

509

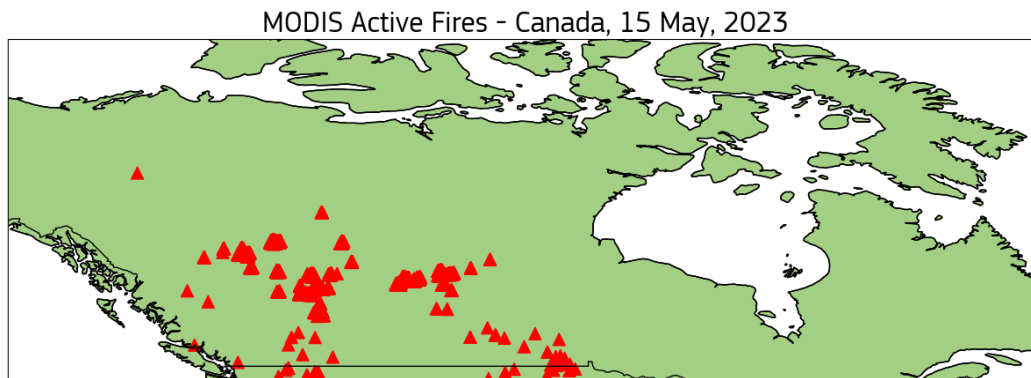

510

511 **Figure S25:** Spatial representation of the day 1 PoF forecast at ~1km resolution expressed as a danger rating for the 15th May over Canada (top). MODIS active fire detections for the same day and domain (bottom).  
512  
513

1 Day PoF FC - Greece, 21 August, 2023

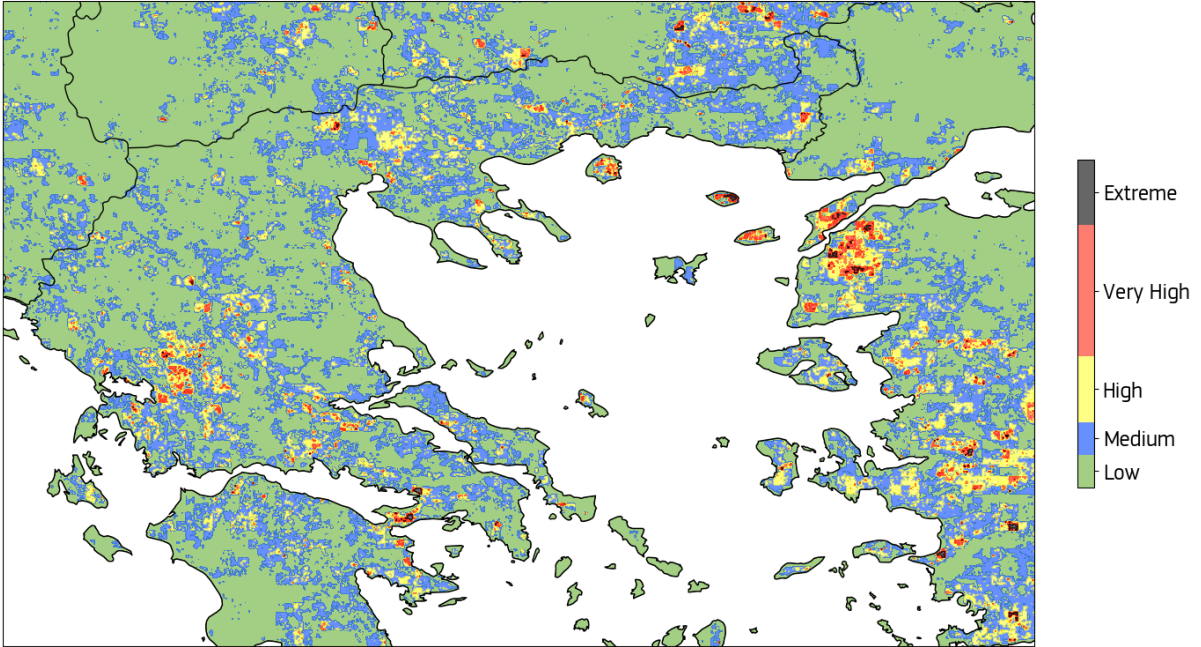

514

MODIS Active Fires - Greece, 21 August, 2023

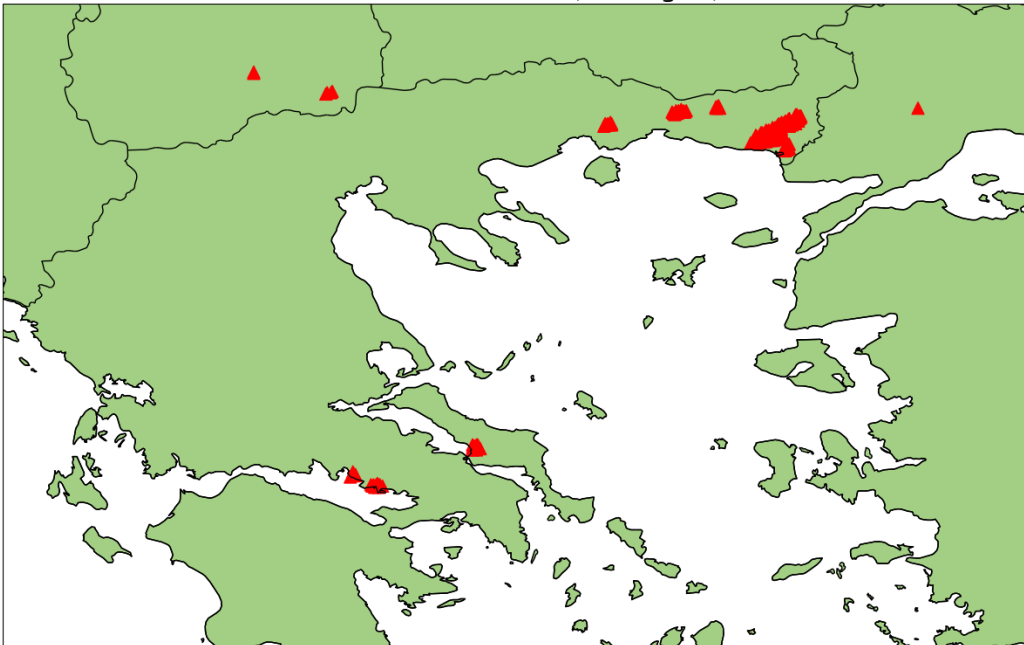

515

516

517

518

**Figure S26:** Spatial representation of the day 1 PoF forecast at ~1km resolution expressed as a danger rating for the 21st August over Northern Greece (top). MODIS active fire detections for the same day and domain (bottom).

1 Day PoF FC - Western Amazonia, 9 September, 2023

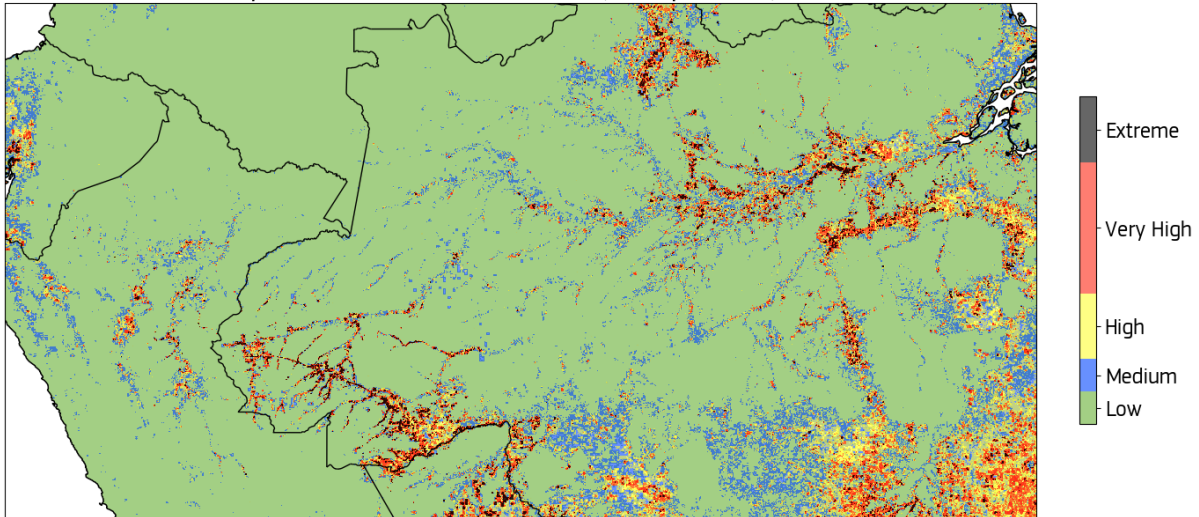

519

MODIS Active Fires - Western Amazonia, 9 September, 2023

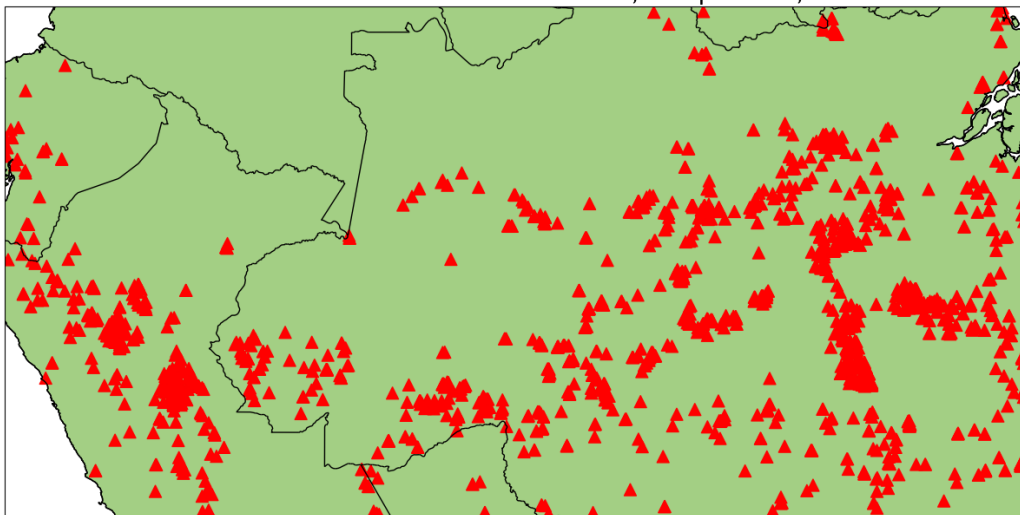

520

521 **Figure S27:** Spatial representation of the day 1 PoF forecast at ~1km resolution expressed  
522 as a danger rating for the 9th September over Western Amazonia (top). MODIS active fire  
523 detections for the same day and domain (bottom).

524

525

526

### S2.2 ConFire

527

528 The ConFire model simulates a probability distribution of BA which, unlike most numerical or  
529 ensemble-based models, requires a probabilistic technique for evaluation.

530 The uncertainty range of the ConFire is crucial for the analysis in this study. We obtain  
531 confidence in our results by seeing if the shift of the model's probability distributions is  
532 significant compared to the size of the uncertainty of that distribution. Suppose the uncertainty  
533 range is larger than any change when testing for i.e, attributing with or without climate change,  
534 future changes, or seasonal anomaly. In that case, the framework will tell us, and our results  
535 will show that these are unlikely/not significant. Conversely, if the change in distribution is  
536 larger than the model's uncertainty range, we can make a confident statement even if that  
537 model is uncertain.

538

539 As the precision of the modeling framework is inherent in the analysis itself, the main aspect  
540 to evaluate is the ability of the model's probability distribution to represent the range of  
541 uncertainties when tested against observations accurately. To do this, we followed the  
542 evaluation procedure outlined in (Barbosa, 2024), which we summarise here.

543

544 We trained the model during the first half of each period used in the analysis and performed  
545 subsequent evaluations on the second half. The training period for near-real-time driver  
546 assessment was 2014-2018, and for the attribution/future projections run, 2003-2011. The  
547 evaluation period was 2019-2023 for driver assessment and 2012-2019 for attribution/future  
548 projections. Using a different period from the optimization ensures an independent model  
549 evaluation and provides an indication of how well the framework captures uncertainty in out-  
550 of-temporal sample observations.

551

552 The FLAME system (Barbosa, 2024) that we merge with ConFire automatically generates a  
553 series of evaluations which we show for region region in turn in the subsequent two sections.  
554 While the techniques are outlined in (Barbosa, 2024), these automated figures have not  
555 previously been published. So alongside the evaluation procedure below is a guide to interpret  
556 if these plots show a good model performance.

557

558 For the evaluation period, we assess how well the model predicts new observations by testing  
559 how likely the observations are given the optimized model (equation 7). While this sounds  
560 counter-intuitive, we do this rather than test the model given the observations because the  
561 model doesn't yield a single answer or a set of numbers, but rather a distribution of model  
562 parameters and output, reflecting inherent uncertainty in the processes. This approach allows  
563 for comprehensive testing of the entire model's posterior probability distribution at once and  
564 provides insight into the model's ability to generate the observed distribution and capture the  
565 uncertainty in the modeled process. We approximate the probability of an observation given  
566 our model by sampling 10 parameter ensemble members from each of our 100 chains,  
567 providing us with 1000 ensemble members, and sample the likelihood as per (Kelley et al.,  
568 2021). The example below, taken from **Figure S32**, shows how we summarise this for each  
569 observation (scatter plot left) and all observations in a time series for each cell (middle and  
570 right). If the model performed perfectly, the probability of the observations given the model will  
571 all be close to 1, as the scatter plot indicated for BA fractions above  $\sim 0.0003$ . The model won't  
572 always capture the uncertainty required to generate the observations. This generally happens  
573 at specific burned areas (like low ones in this example). Areas where this happens often are  
574 highlighted on the map with the map in the middle showing the performance at the 5th  
575 percentile of the time series.

576

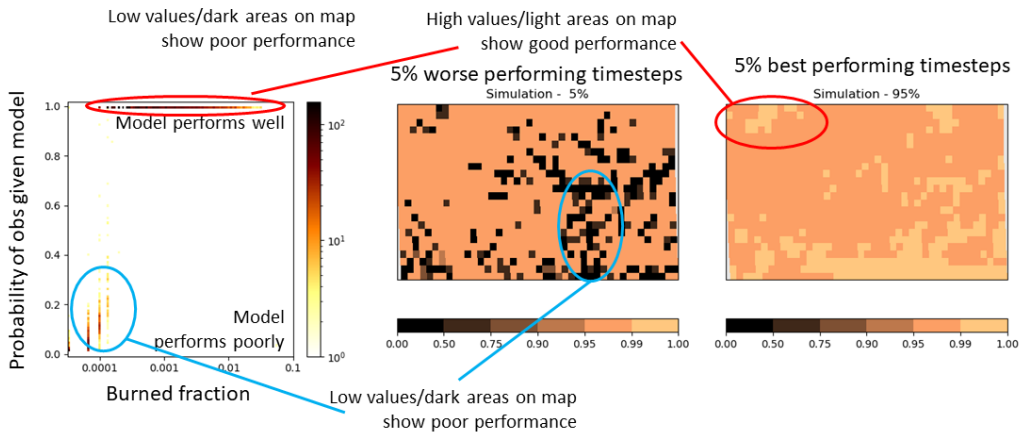

577  
578  
579

580 We also determine the percentile of our observations within the model's posterior probability  
581 distribution. In an unbiased model, we expect the observation's position to be random. We can  
582 start by doing this visually, as shown in the example from **Figure S30**: Observational BA (top  
583 left) should generally fall between the two simulation maps (bottom) that span the 5-95  
584 percentile of the model distribution. Taking the cell highlighted in blue for example - the lower  
585 model estimate is close to zero and the upper is higher than the observations, indicating a  
586 good performance at capturing the observations. Evaluating include parameters representing  
587 noise or stochasticity in the system, that is not always included in the main analysis. Given the  
588 inherent randomness in fire in our study regions, this does result in very broad BA distributions  
589 in the model so a larger difference between the maps showing the BA in the model's tails  
590 ("simulation - 5%" and "simulation - 95%") is to be expected.

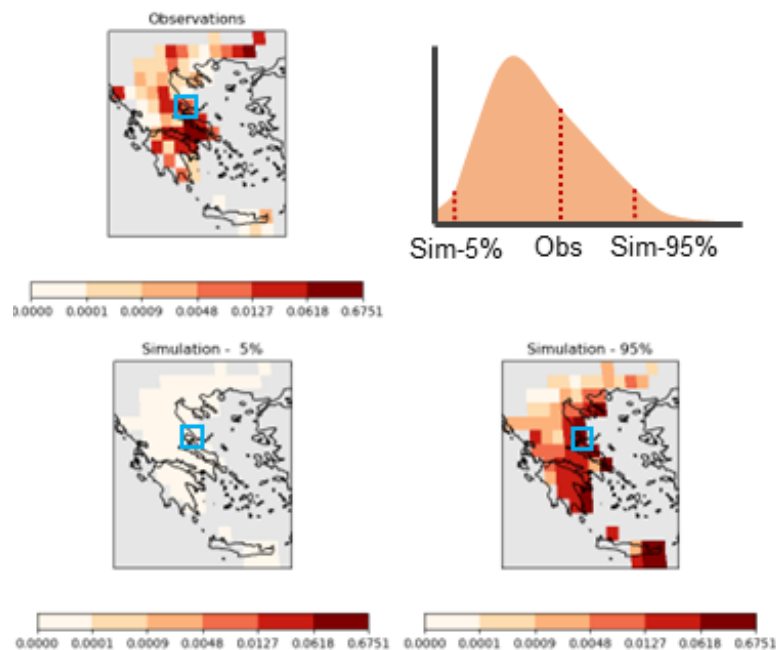

591  
592  
593  
594

We compare the observations (x-axis) likely range (5-95 percentile) of the model's probability distribution. Similarly to the maps above, if the model captures the uncertainties, the



595 observations should fall within this range - i.e the 1:1 line should fall inside the span of the  
 596 model, as seen in this example from **Figure S36**. We also calculate the mean position of the  
 597 observations. This is simply the probability of BA greater than the observation, calculated by  
 598 integrating equation 7 for BAs in the range  $[0, BA]$ . For simulations used in attribution, we also  
 599 build histograms (right, taken from **Figure S39**) of this bias across different percentiles of the  
 600 observations. This shows us if there is any part of the distribution that has a substantially  
 601 different bias. In an unbiased model, these observational positions in the framework's  
 602 probability distribution should average ("Mean Y:" in the histogram) to 0.5. Numbers close to  
 603 1 indicate the observations on average tend towards the higher BA in the distribution, and the  
 604 model generally underestimates BA. This alone does not show if the model performs poorly,  
 605 and a consistent bias across all parts of the BA distribution indicates correct ranking, though  
 606 the need for scaling for attribution analysis (see **Supplement Section "Modelling  
 607 Frameworks > Confire"**).  
 608

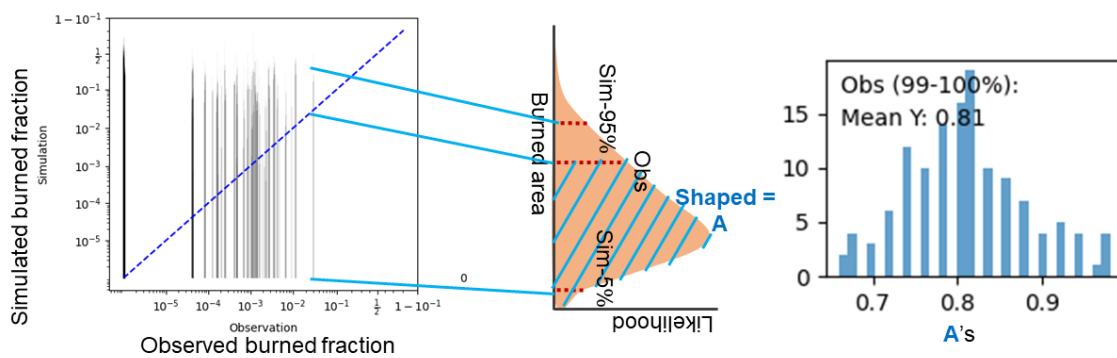

609 We also map out the mean position of the observations of the times series. Again, in an  
 610 unbiased model, given enough timestep, this should average out to 0.5 for each gridcell.  
 611 However, given the small number of timesteps, we map is the observational position in the  
 612 frameworks posterior tends to be significantly different to 0.5 using a t-test to calculate a p-  
 613 value for if the mean of the posterior position of the monthly observations for a given grid cell  
 614 is significantly different from 0.5. Low p-values indicate where the model is biased, which tends  
 615 to suggest too low or high burning.  
 616  
 617

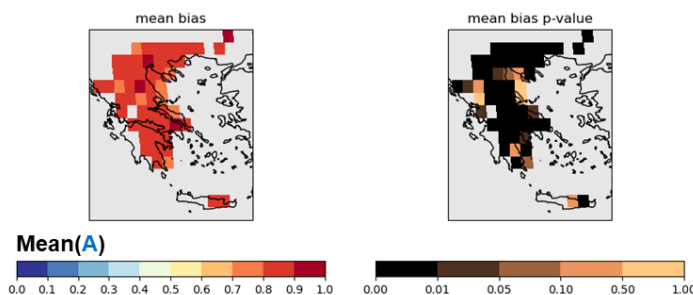

618  
 619  
 620  
 621  
 622 **S2.2.1 Drivers of Regional Burned Area Extremes**  
 623  
 624 The model has shown a consistent ability to capture observations within its uncertainty range  
 625 across all regions, indicating a robust representation of uncertainty. It also demonstrates a

626 high likelihood of aligning with actual observations, indicating strong alignment between  
627 model outputs and real-world data. It effectively represents BA anomalies based on the  
628 driving variables, demonstrating strong explanatory power across different regions.

629

630 However, the model consistently exhibits a low bias in estimating BA across regions, often  
631 underestimating the BA, particularly in specific high-burn regions such as deforestation  
632 areas in Western Amazonia and patches of high BA in northern Canada. This highlights the  
633 common need across regions for better integration of data on human influences and  
634 interactions with fire. It may also hint at the need for better representation of non-linearity  
635 between drivers and BA.

636

637

### 638 **Canada**

639 Our evaluation indicates that the model's assessment of uncertainty does a reasonable job  
640 of capturing the observational range, particularly for high BA. The top row of **Figure S28**  
641 demonstrates this - the observed (on the left) falls between the 5-95% range of the model.  
642 However, there are patches of high BA that are slightly farther north than in the  
643 observations. The model accurately identifies low burning in agricultural regions in southern  
644 Saskatchewan and Alberta, and it suggests lower burning in the north while still  
645 acknowledging the possibility of some burning.

646

647 The probability of observations given the model is very high, especially for medium to high  
648 BA ranging from 0.03% to 3% (**Figure S28** left middle row). This demonstrates that the  
649 modelling framework does a reasonable job of generating observations within this  
650 range. Except for a few locations, even the worst performances tend to show a likelihood of  
651 observations given a model of  $> 0.95$ . For very high BA, the probability decreases but  
652 generally falls within the model's uncertainty range (bottom left), and ranked indicating that  
653 the model can effectively identify high burning anomalies. However, it tends to  
654 underestimate the increase in BA during such anomalies (i.e in **Figure 10**). In fact, the model  
655 tends to be biased towards slightly lower BA in many regions of Canada (bottom middle  
656 map), though only significantly so in the South and West of the country (bottom left map).  
657 Interestingly, the BA picked up by the driving variables alone also effectively reproduces  
658 spatial patterns of BA and regions of high anomalies in 2023, suggesting that the driving  
659 variables used are good at explaining the observed patterns in BA.

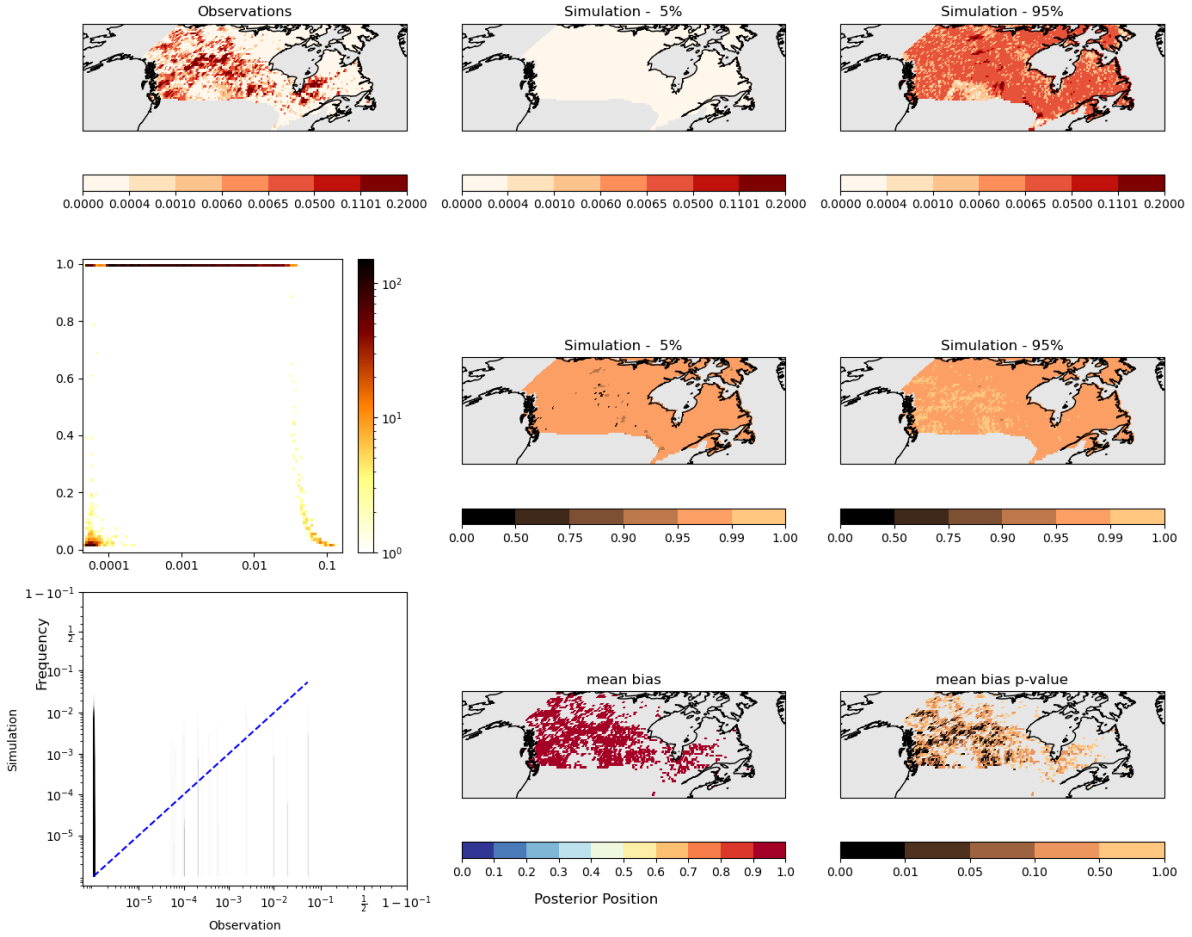

660

661 **Figure S28:** Evaluation plot for driver attribution configuration in **Section 3** over Canada. (top  
 662 observed and simulated BA fraction (%). (Middle row) the likelihood of the out-of-sample  
 663 observations given the models probability distribution and (bottom row) observations position  
 664 in the model distribution. See top of this section for interpretation guide.  
 665

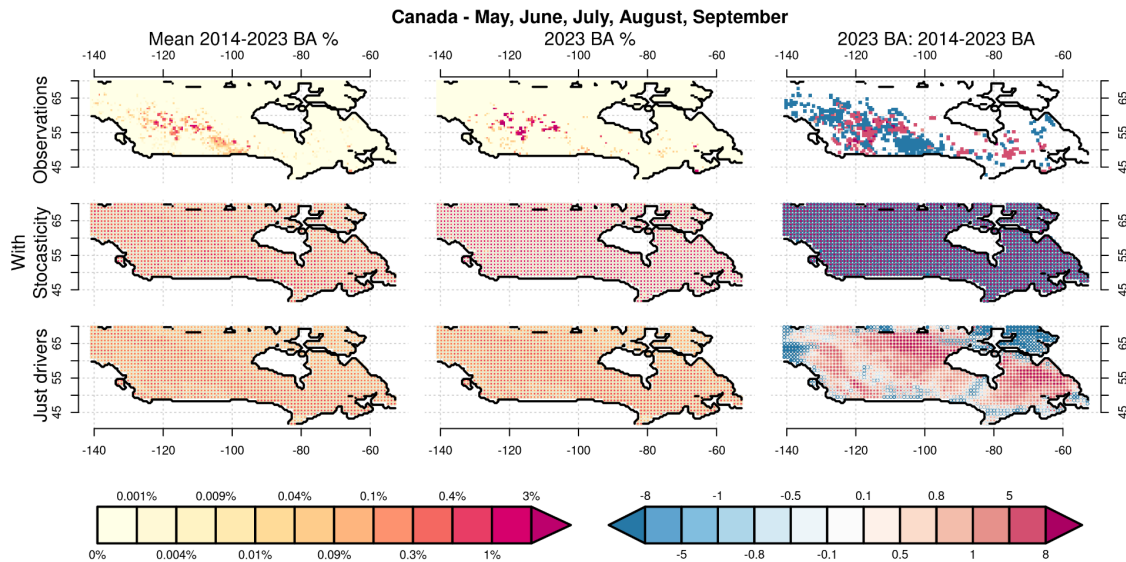

666

667 **Figure S29:** BA % over Canada for May-September for driver attribution configuration in  
 668 **section 3** over (left) 2014-2023 (middle) 2023 and (right) for 2023 anomaly compared to 2014-  
 669 2023, expressed as a factor of increase (red) or fractional decrease (blue). The top row is  
 670 observations, the middle row in ConFire includes stochasticity (equation 7) and the bottom,  
 671 just considers the influence of drivers (equation 8). For ConFire, the size of the dot in each  
 672 grid cell shows the likelihood (larger = higher likelihood) of a BA fraction (or BA change) being  
 673 greater than a given threshold (where the threshold is represented as a coloured dot, see  
 674 legend at the base). High BA overlap smaller. i.e on the left, a large pale orange dot indicates  
 675 a high likelihood of annual average BA exceeding 0.1%, with a small dark red dot indicating a  
 676 small but non-zero likelihood of exceeding 3%

677

678 **Greece**

679 The model effectively represents uncertainties surrounding observed BA and accurately  
 680 captures the gradient between low burning in the northwest of Greece and high burning  
 681 around the southeastern coast. The model's observations show extremely high likelihood  
 682 across all BA, with only a slight dip to around 0.75 likelihood in a few months in coastal  
 683 Thessaly. Additionally, there is a consistent pattern of underestimating BA across all areas of  
 684 Greece, although this is only significant in a few places.

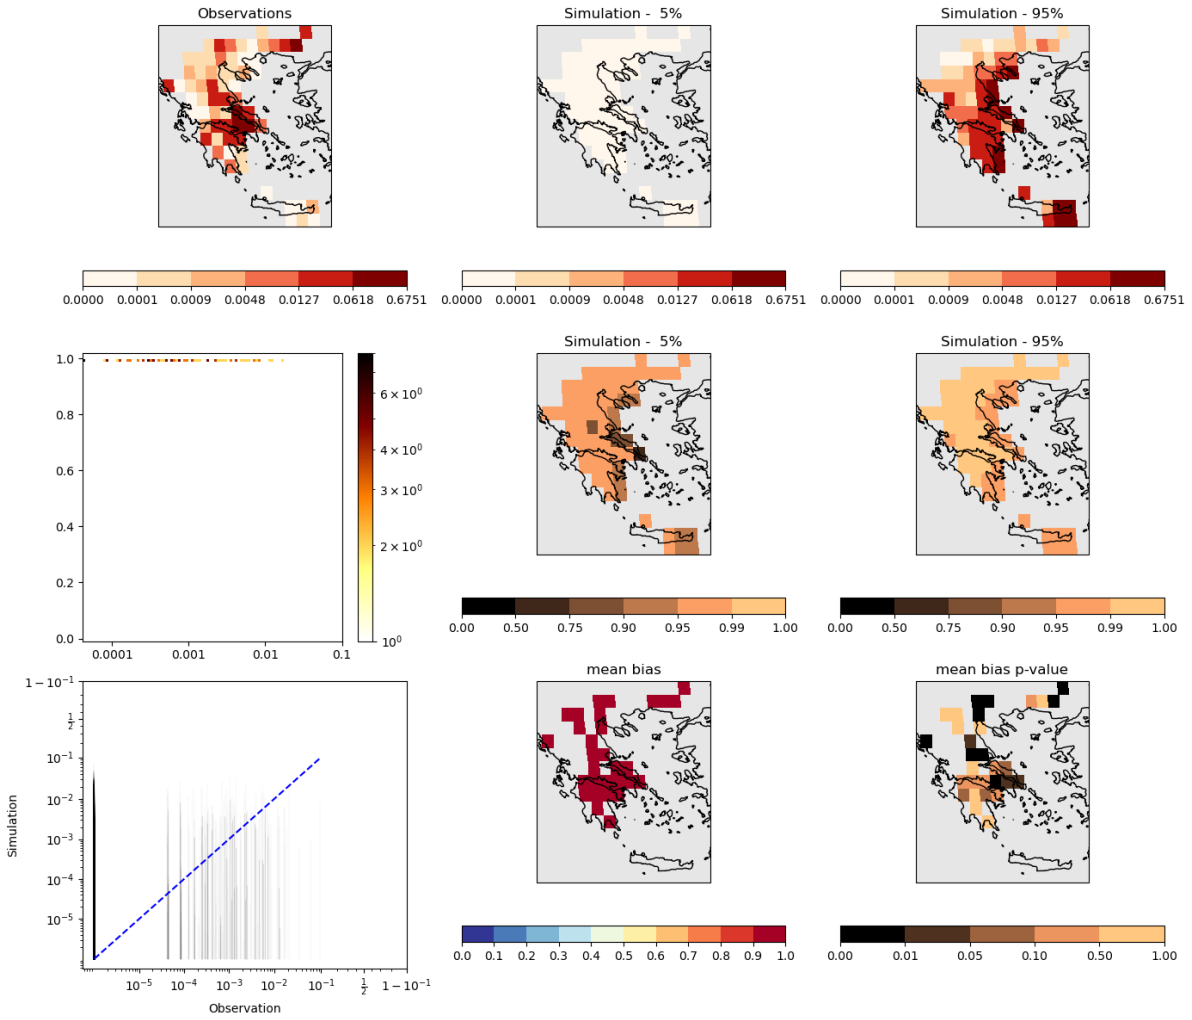

685  
686  
687

**Figure S30:** same as **Figure S28** for Greece

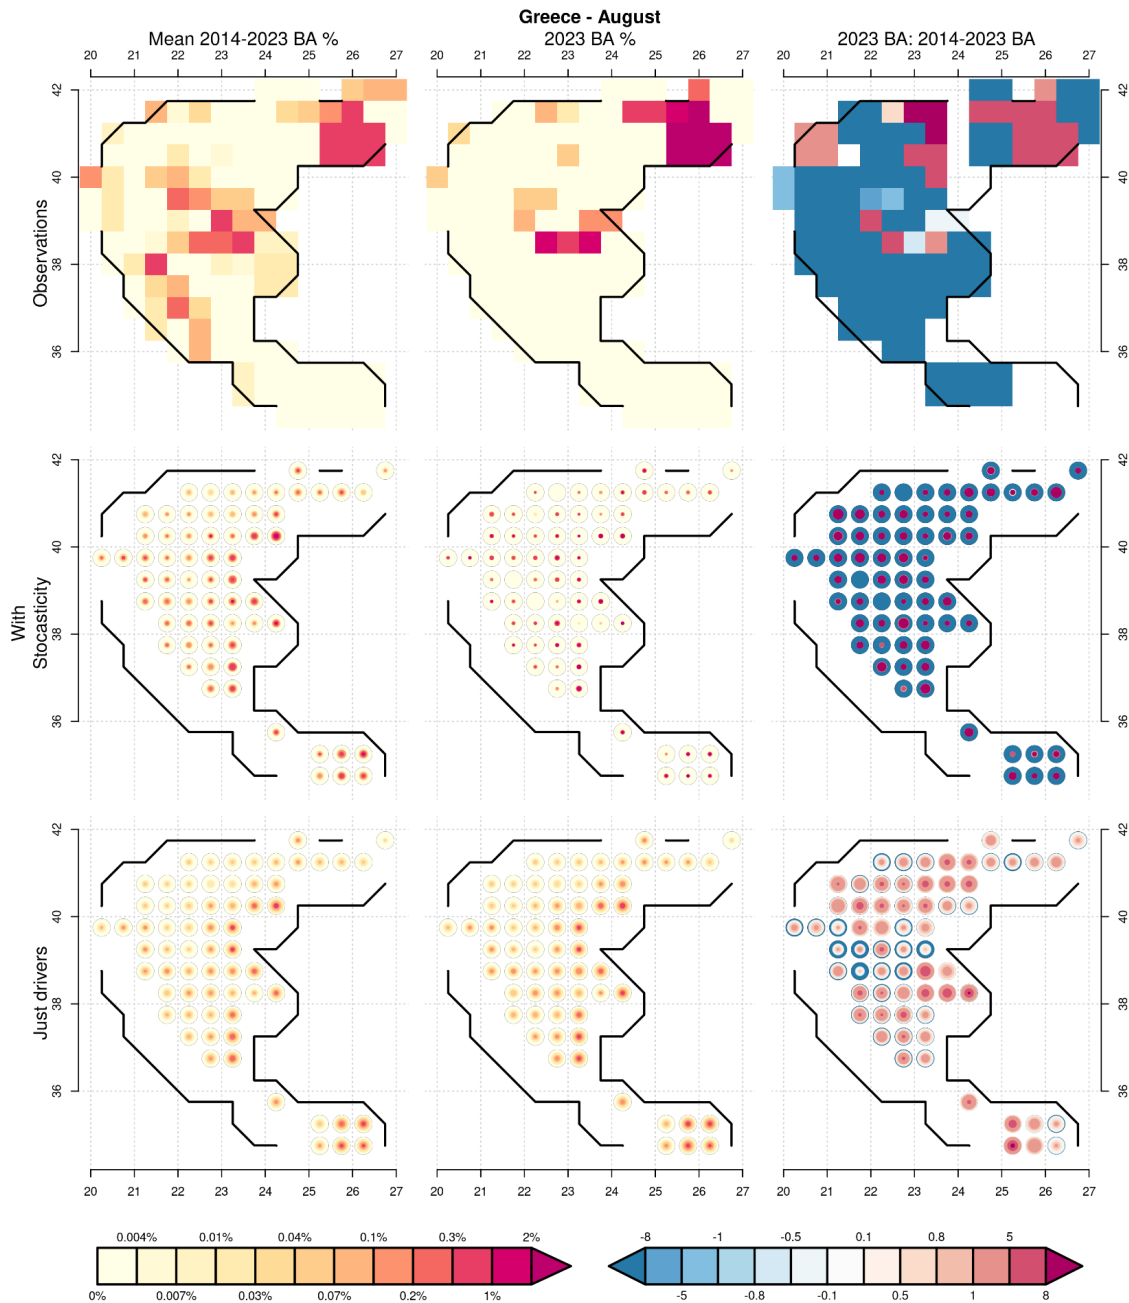

688  
689  
690  
691

**Figure S31:** same as **Figure S29** but for Greece in August

692 **Western Amazonia**

693 The model captures observations within its uncertainty range, but it fails to differentiate  
 694 between high burning in deforestation regions in the south and north of the country. This  
 695 suggests that vital data on deforestation and its interaction with fire may have been missed.  
 696 The model is able to generate observations out of its sample, indicated by a high likelihood  
 697 given observations. However, it does not generate very low BA, particularly in places where

698 high BA are also commonly observed in regions of deforestation. This suggests that the  
 699 model may fail to capture variations in BA in these human-dominated areas. Similar to the  
 700 other two regions, the model demonstrated a low bias. However it can accurately capture BA  
 701 anomalies based solely on the model drivers.

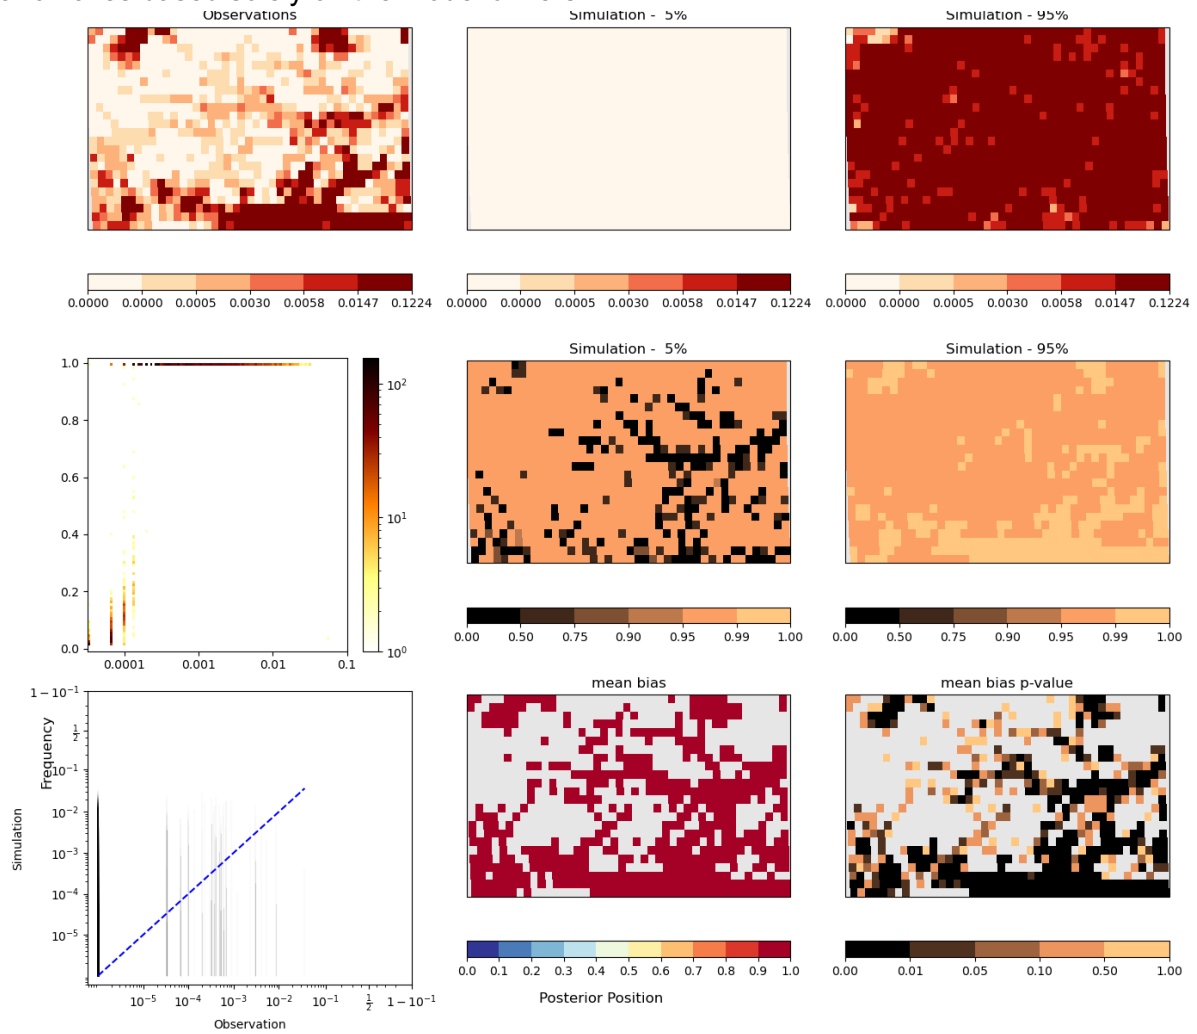

702  
 703 **Figure S32: same as Figure S28 for Western Amazonia**  
 704  
 705

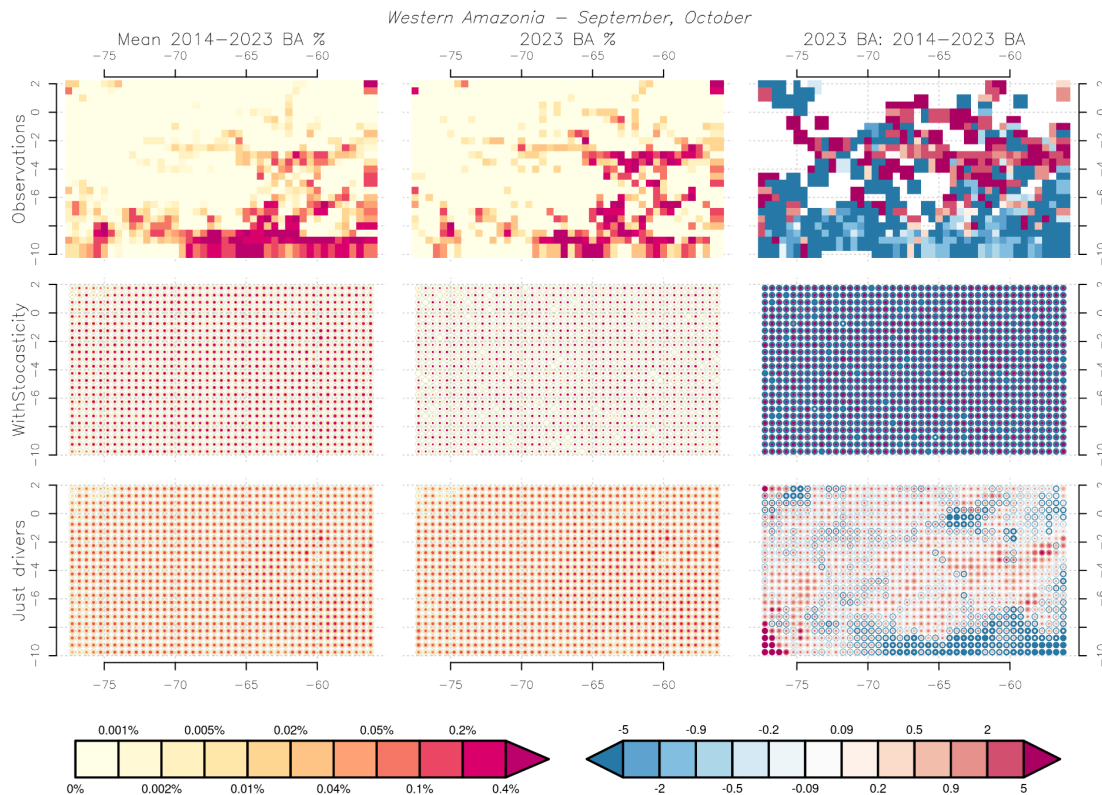

706  
707 **Figure S33:** same as **Figure S29** but for Western Amazonia in September and October.

708  
709  
710 **S2.2.2 Change in Likelihood of High Burned Area in 2023 due to Total Climate Forcing**  
711 **and Socioeconomic factors**

712  
713 The framework utilising ISIMIP3a reanalysis data has been found to outperform its near-real-  
714 time counterpart in simulating BA. It effectively represents high BA and extremes across all  
715 regions. Furthermore, the probability of observations given the model is generally higher in  
716 areas with extreme fires or high BA, indicating the model's reliability for attribution analysis.

717  
718 However, in regions of significant land use change, such as Western Amazonia, the model  
719 struggles with reproducing higher BA, indicating a common challenge across regions in  
720 capturing detailed land use interactions.

721  
722 While observations consistently fall within range of the model distribution, the model  
723 demonstrates consistent low bias. This simple scaling is suggested to align the model with  
724 observations, highlighting a need for calibration to improve accuracy across regions.

725  
726  
727 **Canada**

728 The analysis using isimip reanalysis data shows that the framework performs much better  
729 than its near-real-time counterpart in assessing the drivers of BA (**Figure S34**). Although  
730 there are still large uncertainty ranges, the highest BA in the distribution closely match the



731 high BA observed. In Canada, the model generally performs slightly worse in generating  
 732 observations, but it still tends towards a probability of observations given the model of  
 733 greater than 0.75. However, the model shows that high BA are very likely, indicating that the  
 734 model is useful in representing extremes - critical for attribution analysis. Overall, the model  
 735 exhibits less bias than its near real-time version, with observations falling on average around  
 736 0.6-0.9 throughout the model's distribution. This consistent pattern across the observed  
 737 distribution suggests that a simple scaling is required for attribution application (**Figure S35**).  
 738

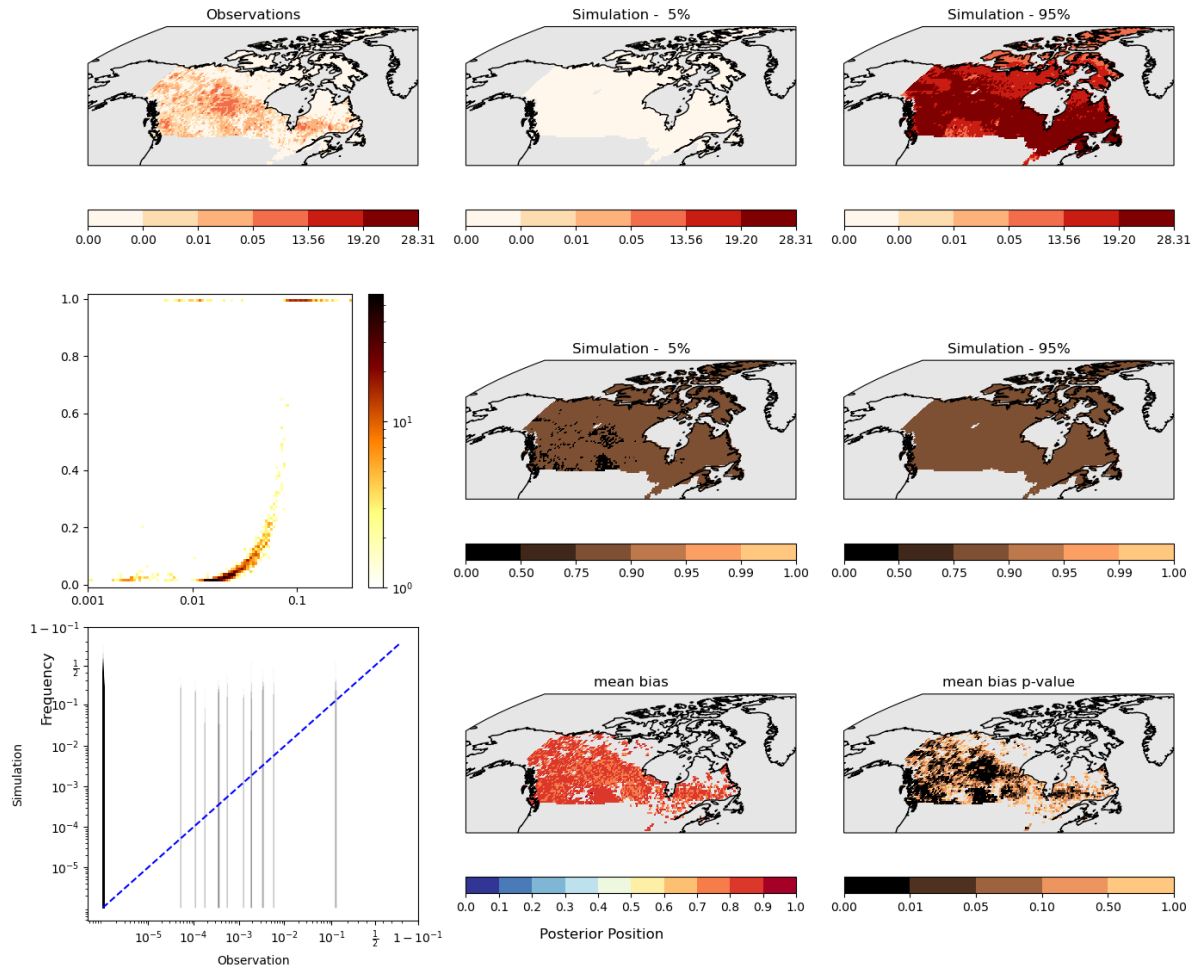

739  
 740 **Figure S34:** same as **Figure S28** for attribution and future projections configuration used in  
 741 **section 4** and **section 5**.

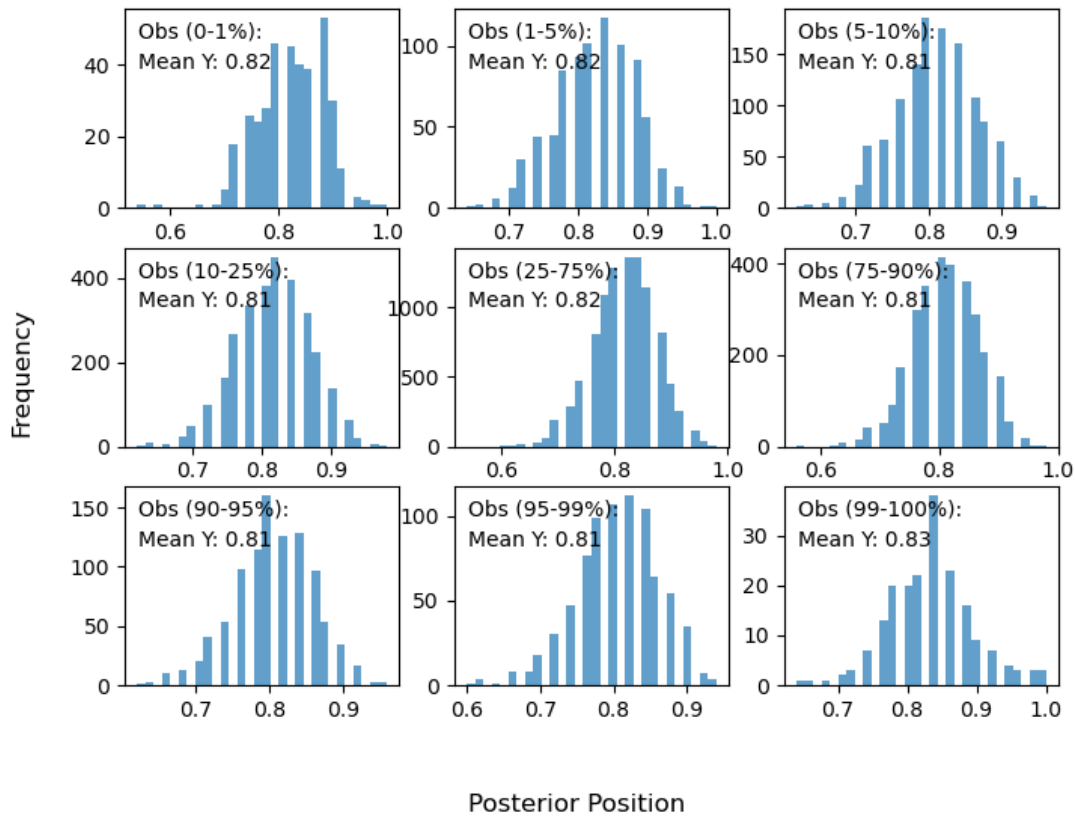

742  
743  
744  
745  
746  
747

**Figure S35:** The position of the observed BA in the model's probability distribution over the evaluation period using attribution and future projections configuration from **Section 4** and **Section 5** over Canada. Histograms are for observed percentiles indicated in the top left corner. See start of section for interpretation guide.

748 **Greece**

749 Over the longer evaluation periods, observations tend to be much noisier across Greece  
750 than in the near real-time driver analysis (**Figure S36**). However, there is still a noticeable  
751 trend towards more burning in the Southeast. This trend is well captured by the model,  
752 including the more noisy spatial distribution in the observations. The probability of observing  
753 a given model can be quite low, but it tends to be higher in areas where extreme fires were  
754 observed and in areas with high burn areas, making it useful for attribution applications.  
755 Additionally, while the model is biased low, similar to Canada, this bias is consistent across  
756 the observed BA distribution (**Figure S37**).  
757

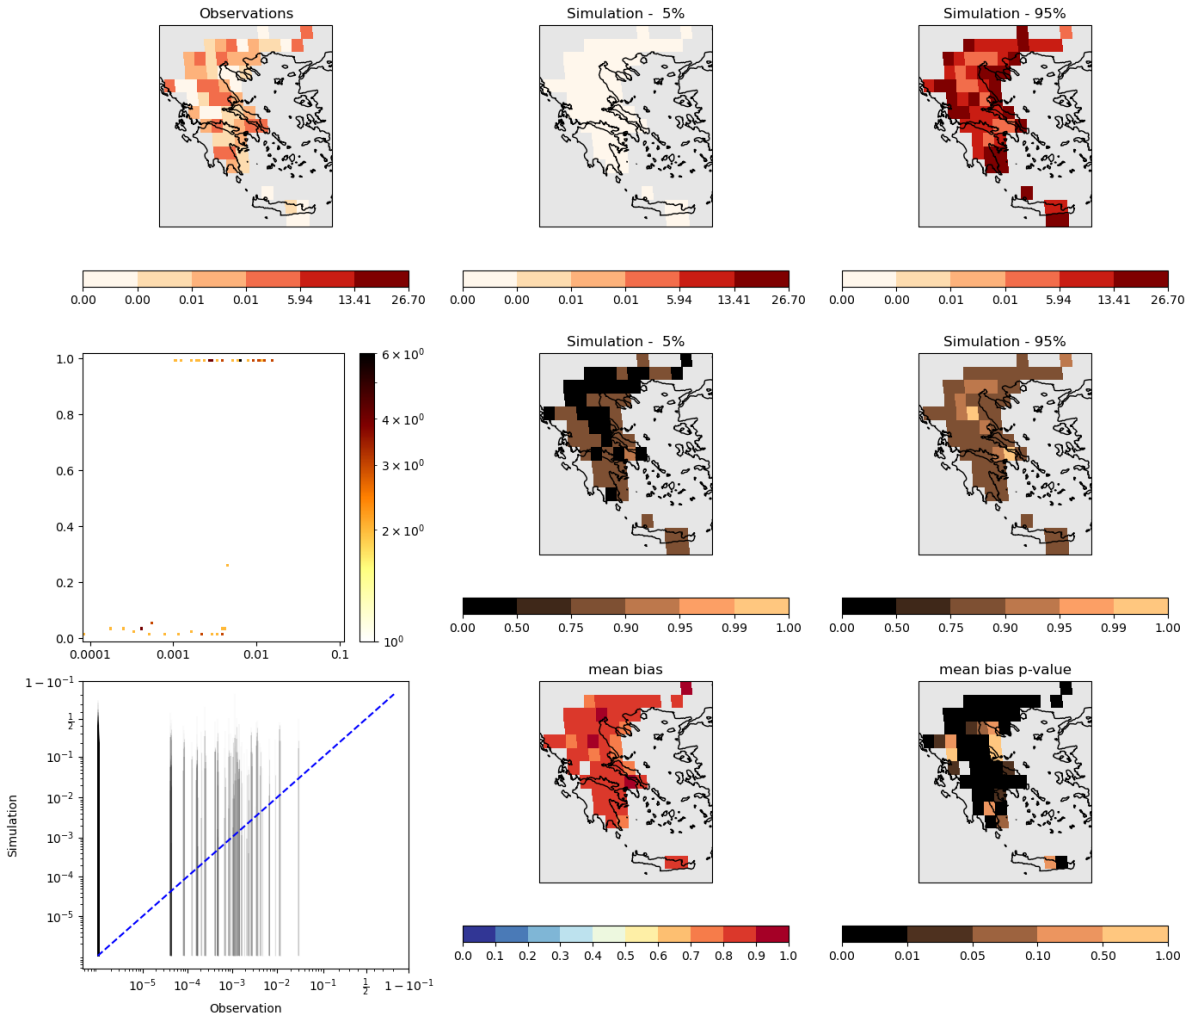

758  
759

**Figure S36:** same as **Figure S34** for Greece

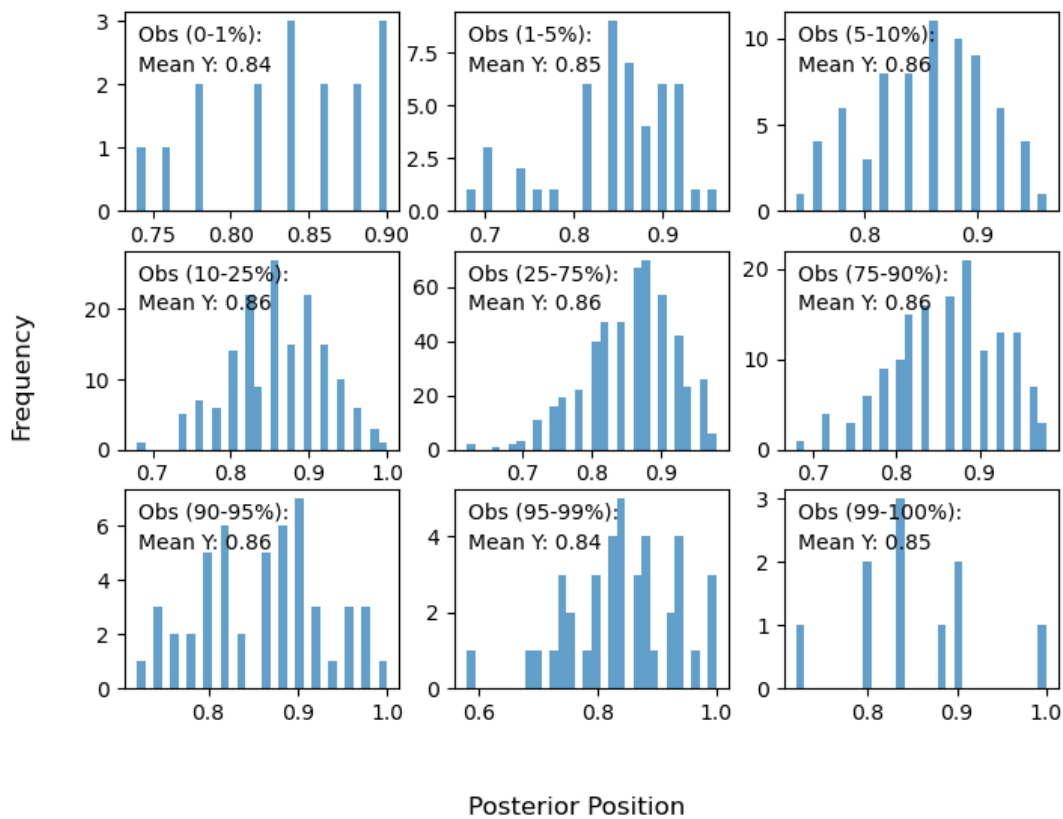

760  
 761 **Figure S37:** same as **Figure S35** for Greece  
 762

763 **Western Amazonia**

764 The framework outperforms its near real time counterpart in simulating higher BA around  
 765 Manaus, although it still struggles to reproduce higher BA in regions of land use change  
 766 (**Figure S38**). Observations fall within the model range and, like the other two regions, the  
 767 observations indicate that the model tends to perform better at generating observed BA at  
 768 higher levels of burning. Overall, this is the least biased region out of the three, although the  
 769 model still tends to underestimate BA, with the observations falling at around 0.7-0.8 of the  
 770 model distribution (**Figure S39**). This pattern is consistent across the distributions .

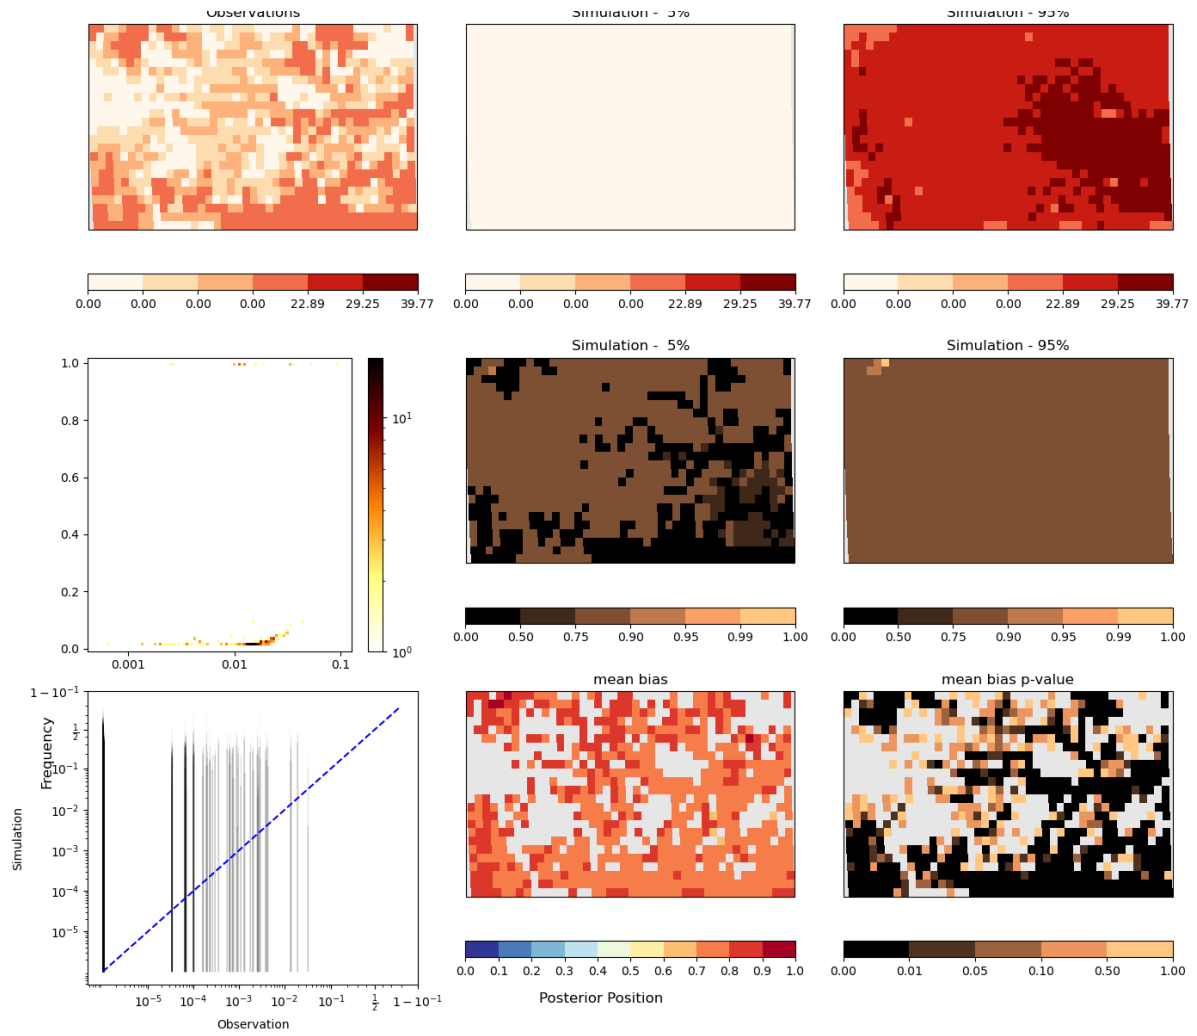

771  
772

**Figure S38:** same as **Figure S34** for Western Amazonia.

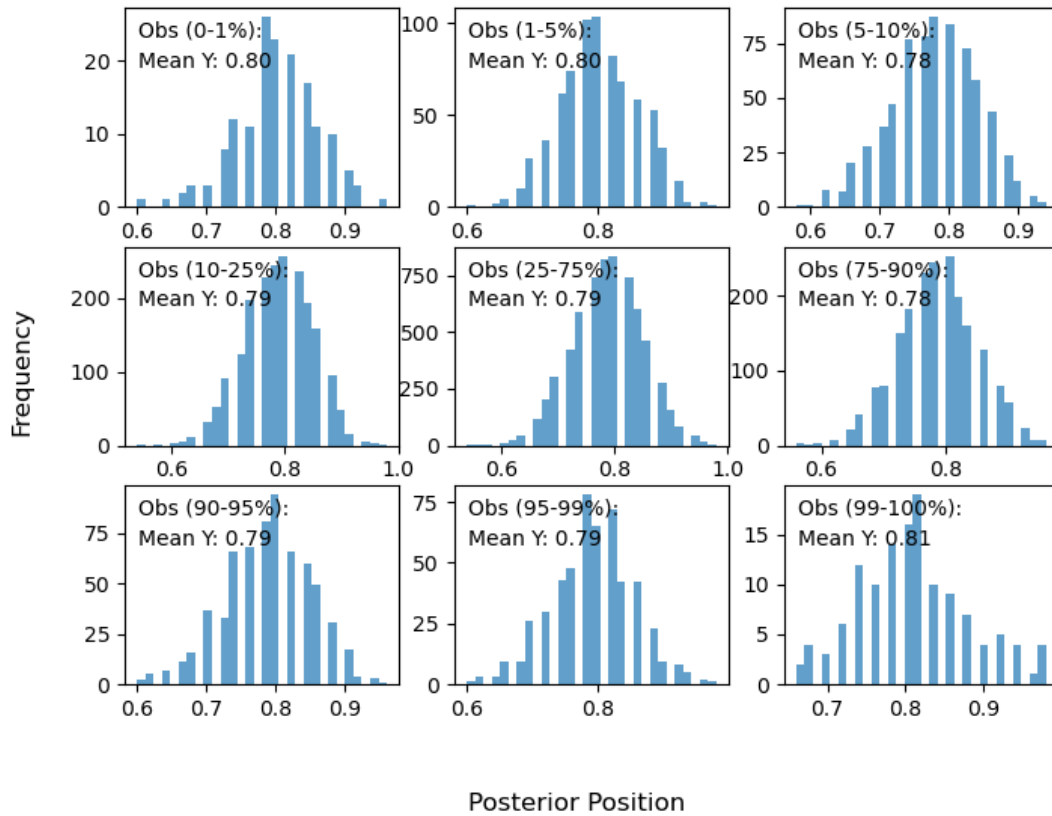

773  
 774 **Figure S39:** same as **Figure S35** for Western Amazonia  
 775

776  
 777 **S2.3 Fire Weather attribution**

779 We evaluated each of the component variables used in the FWI against ERA5 reanalysis for  
 780 the historical period 1960-2013. In each case, HadGEM3 was slightly biased across the  
 781 timeseries, generally simulating conditions that were too hot and dry in Greece (**Figure S40**).  
 782 This led to an overall larger bias in the resultant FWI (**Figure S43**). We therefore applied a  
 783 linear bias-correction to the HadGEM3 ensemble of FWI (see Data and Data Processing).  
 784 Results before and after the bias-correction is applied are shown below for each region.  
 785

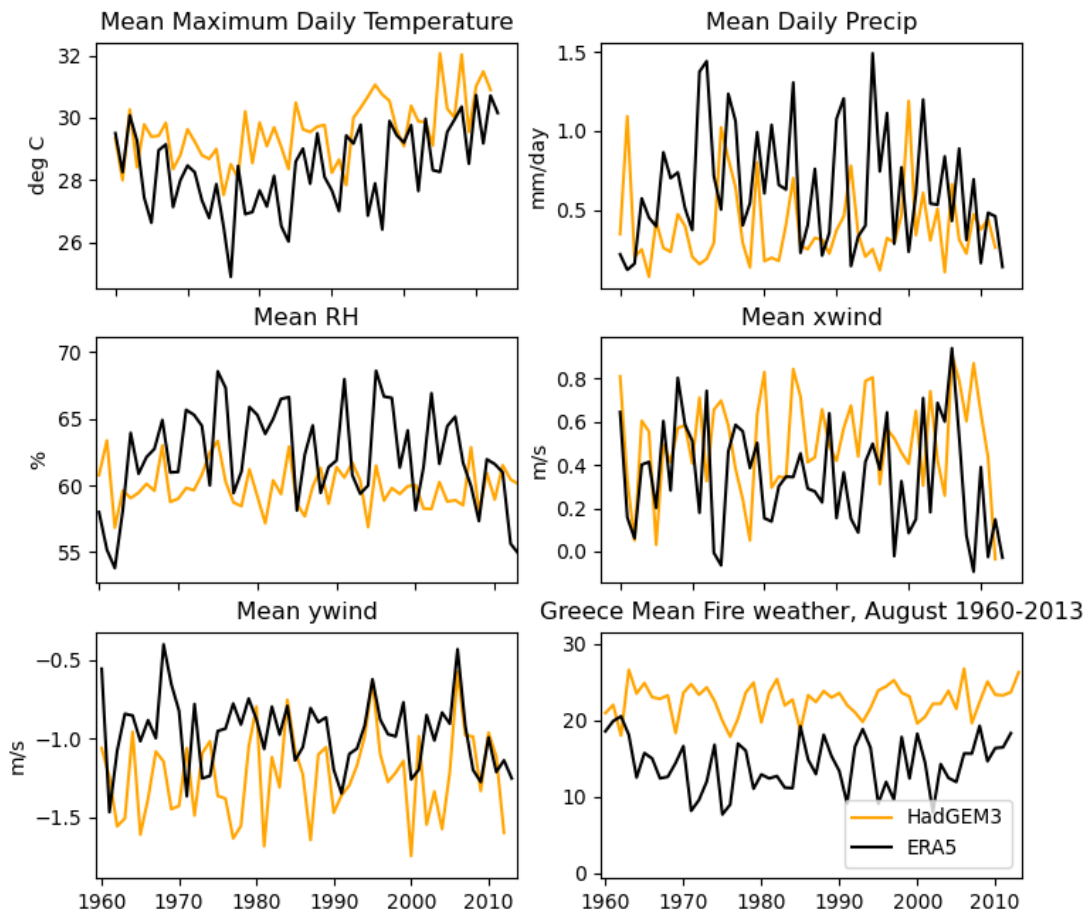

786  
 787 **Figure S40:** Individual component variables of the FWI compared to ERA5 reanalysis across  
 788 the historical period (1960-2013), and resultant FWI. Here one member from the HadGEM3  
 789 historical ensemble is shown (yellow) against ERA5 (black) for one region (Greece), for  
 790 illustration  
 791  
 792

Canada 95th percentile FWI

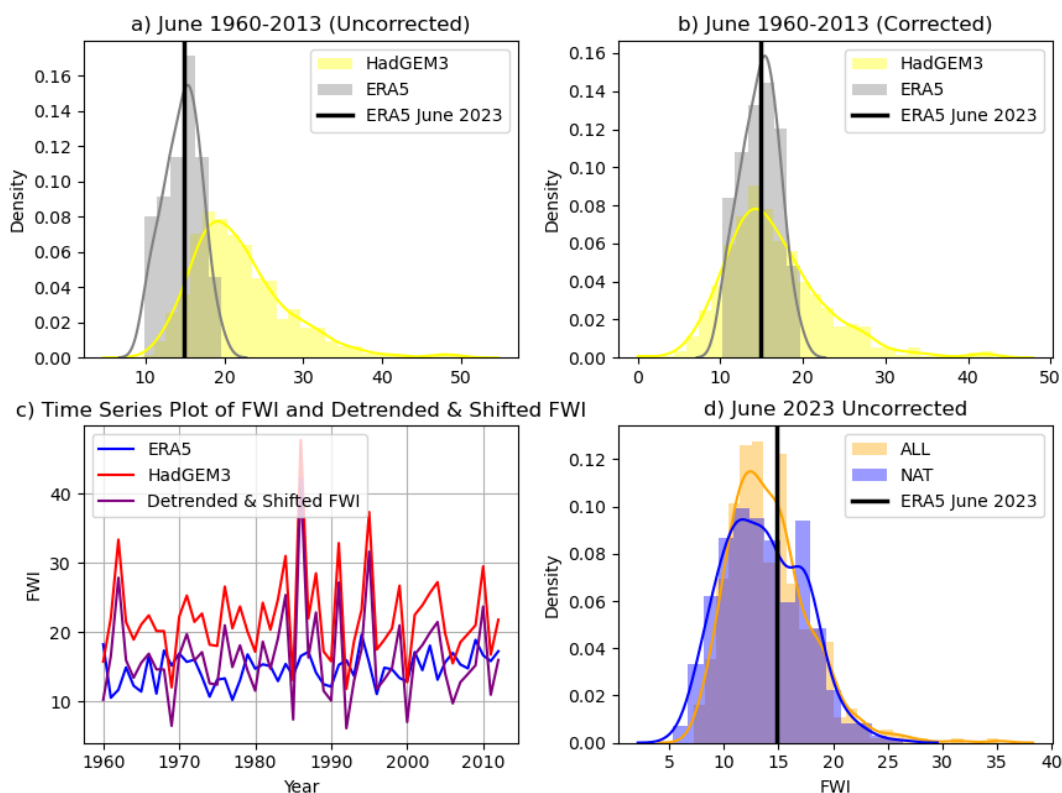

793  
 794 **Figure S41:** Bias correction for Canada. Historical ensemble of HadGEM3 (yellow) compared  
 795 to ERA5 (grey) 95th percentile of FWI for the historical period (1960-2013), shown as  
 796 probability density before correction (a) and after correction (b), and one member shown as a  
 797 timeseries (c, where HadGEM3 is shown in red, ERA5 in blue and corrected HadGEM3 in  
 798 purple). HadGEM3 ensemble for 2023 shown before bias-correction (d). ERA5 2023 event  
 799 shown as black vertical line on all probability density plots.  
 800



SAM 95th percentile FWI

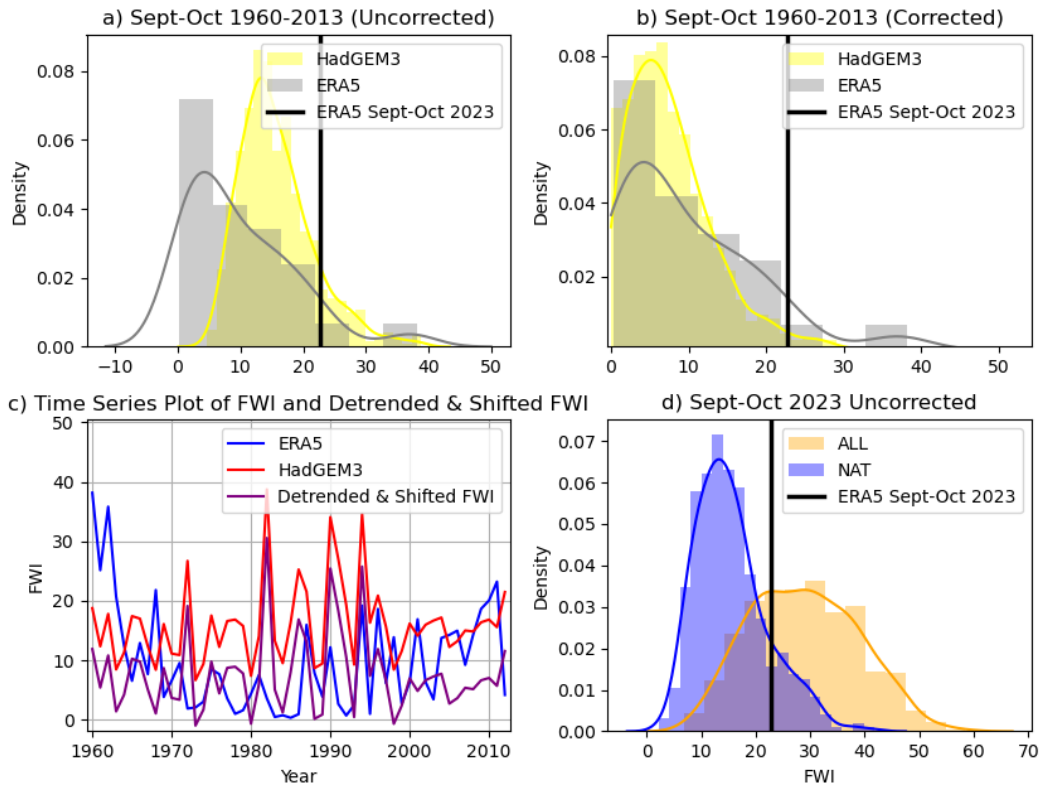

801  
802  
803

**Figure S42:** As for **Figure S41**, but for Western Amazonia

Greece 90th percentile FWI

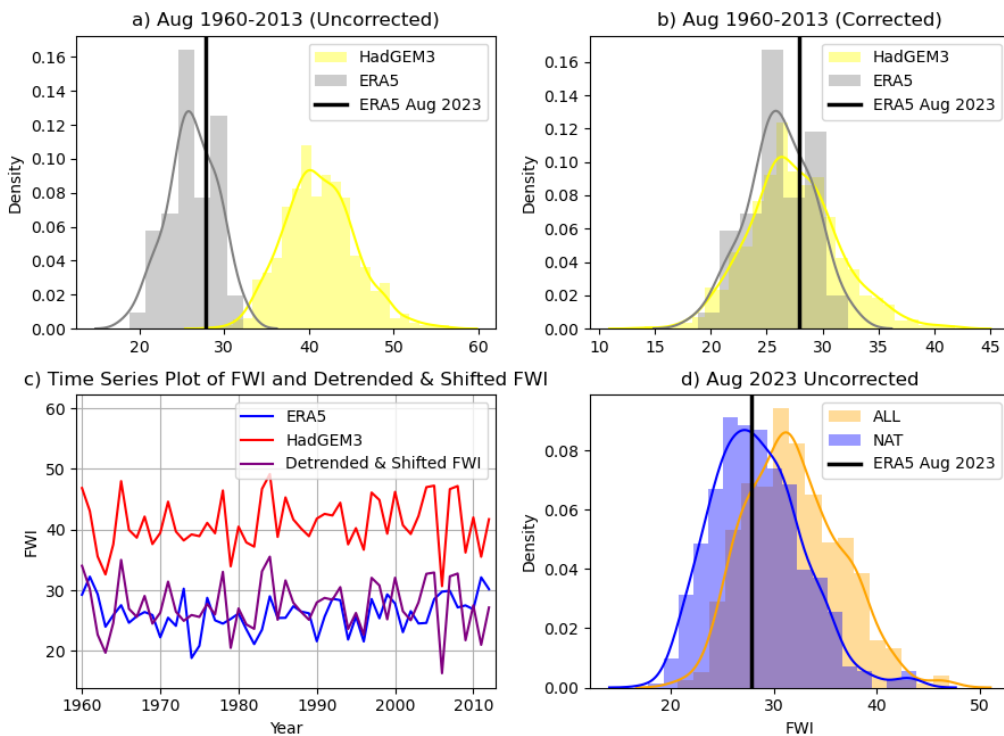

804  
805  
806

**Figure S43:** As for **Figure S41**, but for Greece at 90th percentile FWI

## 807 **Supplementary References**

- 808 Abril-Pla, O., Andreani, V., Carroll, C., Dong, L., Fomesbeck, C. J., Kochurov, M., Kumar,  
809 R., Lao, J., Luhmann, C. C., Martin, O. A., Osthege, M., Vieira, R., Wiecki, T., and Zinkov,  
810 R.: PyMC: a modern, and comprehensive probabilistic programming framework in Python,  
811 PeerJ Comput Sci, 9, e1516, <https://doi.org/10.7717/peerj-cs.1516>, 2023.
- 812 Barbosa, M. L. F.: TRACING THE ASHES: UNCOVERING BURNED AREA PATTERNS  
813 AND DRIVERS OVER THE BRAZILIAN BIOMES, PhD, Instituto Nacional de Pesquisas  
814 Espaciais, 2024.
- 815 Burton, C., Betts, R., Cardoso, M., Feldpausch, T. R., Harper, A., Jones, C. D., Kelley, D. I.,  
816 Robertson, E., and Wiltshire, A.: Representation of fire, land-use change and vegetation  
817 dynamics in the Joint UK Land Environment Simulator vn4. 9 (JULES), Geoscientific Model  
818 Development, 12, 179–193, 2019.
- 819 Burton, C., Betts, R. A., Jones, C. D., Feldpausch, T. R., Cardoso, M., and Anderson, L. O.:  
820 El Niño Driven Changes in Global Fire 2015/16, Front Earth Sci. Chin., 8,  
821 <https://doi.org/10.3389/feart.2020.00199>, 2020.
- 822 Burton, C., Kelley, D. I., Jones, C. D., and Betts, R. A.: South American fires and their  
823 impacts on ecosystems increase with continued emissions, Climate Resilience, 2022.
- 824 Burton, C., Lampe, S., Kelley, D. I., Thiery, W., Hantson, S., Christidis, N., Gudmundsson,  
825 L., Forrest, M., Burke, E., Chang, J., and Others: Global burned area increasingly explained  
826 by climate change, Preprint at [https://doi.org/10.21203/rs, 3](https://doi.org/10.21203/rs.3.rs2823231/v1), 2023.
- 827 Ciavarella, A., Christidis, N., Andrews, M., Groenendijk, M., Rostron, J., Elkington, M.,  
828 Burke, C., Lott, F. C., and Stott, P. A.: Upgrade of the HadGEM3-A based attribution system  
829 to high resolution and a new validation framework for probabilistic event attribution, Weather  
830 and Climate Extremes, 20, 9–32, <https://doi.org/10.1016/j.wace.2018.03.003>, 2018.
- 831 Clark, D. B., Mercado, L. M., Sitch, S., Jones, C. D., Gedney, N., Best, M. J., Pryor, M.,  
832 Rooney, G. G., Essery, R. L. H., Blyth, E., Boucher, O., Harding, R. J., Huntingford, C., and  
833 Cox, P. M.: The Joint UK Land Environment Simulator (JULES), model description – Part 2:  
834 Carbon fluxes and vegetation dynamics, Geoscientific Model Development, 4, 701–722,  
835 <https://doi.org/10.5194/gmd-4-701-2011>, 2011.
- 836 Dimiceli, C. and Others: MOD44B MODIS/Terra Vegetation Continuous Fields Yearly L3  
837 Global 250m SIN Grid V006 (NASA EOSDIS Land Processes DAAC, 2015), 2015.
- 838 DiMiceli, C. M., Carroll, M. L., Sohlberg, R. A., Huang, C., Hansen, M. C., and Townshend,  
839 J. R. G.: Annual global automated MODIS vegetation continuous fields (MOD44B) at 250 m  
840 spatial resolution for data years beginning day 65, 2000? 2010, collection 5 percent tree  
841 cover, University of Maryland, College Park, MD, USA, 2017.
- 842 Hantson, S., Arneth, A., Harrison, S. P., and Kelley, D. I.: The status and challenge of global  
843 fire modelling, 2016.
- 844 Hoffman, M. D. and Gelman, A.: The No-U-Turn Sampler: Adaptively Setting Path Lengths in  
845 Hamiltonian Monte Carlo, arXiv [stat.CO], arXiv, 1593–1623,  
846 <https://doi.org/10.5555/2627435.2638586>, 2011.
- 847 Huang, H., Xue, Y., Li, F., and Liu, Y.: Modeling long-term fire impact on ecosystem  
848 characteristics and surface energy using a process-based vegetation–fire model  
849 SSiB4/TRIFFID-Fire v1.0, Geosci. Model Dev., [https://doi.org/10.5194/gmd-2020-122-](https://doi.org/10.5194/gmd-2020-122)

- 850 supplement, 2020.
- 851 Huang, H., Xue, Y., Liu, Y., Li, F., and Okin, G.: Modeling the short-term fire effects on  
852 vegetation dynamics and surface energy in Southern Africa using the improved  
853 SSiB4/TRIFFID-Fire model, <https://doi.org/10.5194/gmd-2021-116>, 2021.
- 854 Hugelius, G., Tarnocai, C., Broll, G., Canadell, J. G., Kuhry, P., and Swanson, D. K.: The  
855 Northern Circumpolar Soil Carbon Database: spatially distributed datasets of soil coverage  
856 and soil carbon storage in the northern permafrost regions, *Earth Syst. Sci. Data*, 5, 3–13,  
857 <https://doi.org/10.5194/essd-5-3-2013>, 2013.
- 858 Ito, A.: Disequilibrium of terrestrial ecosystem CO<sub>2</sub> budget caused by disturbance-induced  
859 emissions and non-CO<sub>2</sub> carbon export flows: a global model assessment, *Earth Syst. Dyn.*,  
860 10, 685–709, <https://doi.org/10.5194/esd-10-685-2019>, 2019.
- 861 Kelley, D. I., Harrison, S. P., Wang, H., and Simard, M.: A comprehensive benchmarking  
862 system for evaluating global vegetation models, 2013.
- 863 Kelley, D. I., Bistinas, I., Whitley, R., and Burton, C.: How contemporary bioclimatic and  
864 human controls change global fire regimes, *Nat. Clim. Chang.*, 2019.
- 865 Kelley, D. I., Burton, C., Huntingford, C., and Brown, M. A. J.: Low meteorological influence  
866 found in 2019 Amazonia fires, 2021.
- 867 Knorr, W., Kaminski, T., Arneth, A., and Weber, U.: Impact of human population density on  
868 fire frequency at the global scale, *Biogeosciences*, 11, 1085–1102, 2014.
- 869 Knutti, R., Sedláček, J., Sanderson, B. M., Lorenz, R., Fischer, E. M., and Eyring, V.: A  
870 climate model projection weighting scheme accounting for performance and  
871 interdependence, *Geophys. Res. Lett.*, 44, 1909–1918,  
872 <https://doi.org/10.1002/2016gl072012>, 2017.
- 873 Lange, S.: Trend-preserving bias adjustment and statistical downscaling with ISIMIP3BASD  
874 (v1.0), *Geosci. Model Dev.*, <https://doi.org/10.5194/GMD-12-3055-2019>, 2019.
- 875 Lehsten, V., Tansey, K., Balzter, H., Thonicke, K., Spessa, A., Weber, U., Smith, B., and  
876 Arneth, A.: Estimating carbon emissions from African wildfires, *Biogeosciences*, 6, 349–360,  
877 <https://doi.org/10.5194/bg-6-349-2009>, 2009.
- 878 Li, F., Zeng, X. D., and Levis, S.: A process-based fire parameterization of intermediate  
879 complexity in a Dynamic Global Vegetation Model, *Biogeosciences*, 9, 2761–2780,  
880 <https://doi.org/10.5194/bg-9-2761-2012>, 2012.
- 881 Li, F., Levis, S., and Ward, D. S.: Quantifying the role of fire in the Earth system – Part 1:  
882 Improved global fire modeling in the Community Earth System Model (CESM1),  
883 *Biogeosciences*, 10, 2293–2314, <https://doi.org/10.5194/bg-10-2293-2013>, 2013.
- 884 Mangeon, S., Voulgarakis, A., Gilham, R., Harper, A., Sitch, S., and Folberth, G.: INFERNO:  
885 a fire and emissions scheme for the UK Met Office’s Unified Model, *Geosci. Model Dev.*, 9,  
886 2685–2700, <https://doi.org/10.5194/gmd-9-2685-2016>, 2016.
- 887 Mathison, C., Burke, E., Hartley, A. J., Kelley, D. I., Burton, C., Robertson, E., Gedney, N.,  
888 Williams, K., Wiltshire, A., Ellis, R. J., Sellar, A. A., and Jones, C. D.: Description and  
889 evaluation of the JULES-ES set-up for ISIMIP2b, *Geoscientific Model Development*, 16,  
890 4249–4264, <https://doi.org/10.5194/gmd-16-4249-2023>, 2023.
- 891 McNorton, J. and Di Giuseppe, F.: A global fuel characteristic model and dataset for wildfire

- 892 prediction, *Biogeosciences*, <https://doi.org/10.5194/bg-21-279-2024>, 2024.
- 893 Melton, J., Arora, V., Wisernig-Cojoc, E., Seiler, C., Fortier, M., Chan, E., and Teckentrup,  
894 L.: CLASSIC v1.0: the open-source community successor to the Canadian Land Surface  
895 Scheme (CLASS) and the Canadian Terrestrial Ecosystem Model (CTEM) – Part 1: Model  
896 framework and site-level performance, *Geosci. Model Dev.*, 13, 2825–2850,  
897 <https://doi.org/10.5194/gmd-2019-329-supplement>, 2020.
- 898 Mengel, M., Treu, S., Lange, S., and Frieler, K.: ATTRICI v1. 1--counterfactual climate for  
899 impact attribution, *Geoscientific Model Development*, 14, 5269–5284, 2021.
- 900 Moritz, M. A., Morais, M. E., Summerell, L. A., Carlson, J. M., and Doyle, J.: Wildfires,  
901 complexity, and highly optimized tolerance, *Proc. Natl. Acad. Sci. U. S. A.*, 102, 17912–  
902 17917, <https://doi.org/10.1073/pnas.0508985102>, 2005.
- 903 Rabin, S. S., Melton, J. R., and Lasslop, G.: The Fire Modeling Intercomparison Project  
904 (FireMIP), phase 1: experimental and analytical protocols with detailed model descriptions,  
905 *Geoscientific Model*, 2017.
- 906 Sellar, A. A., Jones, C. G., and Mulcahy, J. P.: UKESM1: Description and evaluation of the  
907 UK Earth System Model, in *Modeling Earth ...*, 2019.
- 908 Smith, B., Wårlind, D., Arneth, A., Hickler, T., Leadley, P., Siltberg, J., and Zaehle, S.:  
909 Implications of incorporating N cycling and N limitations on primary production in an  
910 individual-based dynamic vegetation model, *Biogeosciences*, 11, 2027–2054,  
911 <https://doi.org/10.5194/bg-11-2027-2014>, 2014.
- 912 Spuler, F., Wessel, J., Comyn-Platt, E., Varndell, J., and Cagnazzo, C.: *ibicus*: a new open-  
913 source Python package and comprehensive interface for statistical bias adjustment and  
914 evaluation in climate modelling (v1.0.1), *Geosci. Model Dev.*, <https://doi.org/10.5194/gmd-17-1249-2024>, 2024.
- 916 Thonicke, K., Venevsky, S., Sitch, S., and Cramer, W.: The role of fire disturbance for global  
917 vegetation dynamics: coupling fire into a Dynamic Global Vegetation Model, *Glob. Ecol.*  
918 *Biogeogr.*, 10, 661–677, <https://doi.org/10.1046/j.1466-822x.2001.00175.x>, 2001.
- 919 Thonicke, K., Spessa, A., Prentice, I. C., Harrison, S. P., Dong, L., and Carmona-Moreno,  
920 C.: The influence of vegetation, fire spread and fire behaviour on biomass burning and trace  
921 gas emissions: results from a process-based model, *Biogeosciences*, 7, 1991–2011,  
922 <https://doi.org/10.5194/bg-7-1991-2010>, 2010.
- 923 UNEP, Popescu, A., Paulson, A. K., Christianson, A. C., Sullivan, A., Tulloch, A., Bilbao, B.,  
924 Mathison, C., Robinson, C., Burton, C., Ganz, D., Nangoma, D., Saah, D., Armenteras, D.,  
925 Driscoll, D., Hankins, D. L., Kelley, D. I., Langer, E. R. L., Baker, E., Berenguer, E., Reisen,  
926 F., Robinne, F.-N., Galudra, G., Humphrey, G., Safford, H., Baird, I. G., Oliveras, I., Littell, J.,  
927 Kieft, J., Chew, J., Maclean, K., Wittenberg, L., Anderson, L. O., Gillson, L., Plucinski, M.,  
928 Moritz, M., Brown, M., Soto, M. C., Flannigan, M., Costello, O., Silva, P. S., Fernandes, P.,  
929 Moore, P., Jandt, R., Bianchi, R., Libonati, R., Archibald, S., Dunlop, S., McCaffrey, S.,  
930 Page, S., Gonzãfãjlez, T. D. T., Sokchea, T., and Charlton, V.: *Spreading like Wildfire: The*  
931 *Rising Threat of Extraordinary Landscape Fires*, edited by: Sullivan, A., Kurvits, T., and E.,  
932 B., United Nations Environment Programme and GRID-Arendal., 2022.
- 933 Yue, C., Ciais, P., Cadule, P., Thonicke, K., Archibald, S., Poulter, B., Hao, W., Hantson, S.,  
934 Mouillot, F., Friedlingstein, P., Maignan, F., and Viovy, N.: Modelling the role of fires in the  
935 terrestrial carbon balance by incorporating SPITFIRE into the global vegetation model  
936 ORCHIDEE – Part 1: simulating historical global burned area and fire regimes, *Geoscientific*

- 937 Model Development, 7, 2747–2767, <https://doi.org/10.5194/GMD-7-2747-2014>, 2014.
- 938 Yue, C., Cadule, P., and Van Leeuwen, T. T.: Modelling the role of fires in the terrestrial  
939 carbon balance by incorporating SPITFIRE into the global vegetation model ORCHIDEE--  
940 Part 2: Carbon emissions and the role of fires in the global carbon balance, Geoscientific  
941 Model Development, 8, 1321–1338, 2015.
- 942 European Commission EU Science Hub: Wildfires in the Mediterranean: EFFIS data reveal  
943 extent this summer, available at: [https://joint-research-centre.ec.europa.eu/jrc-news-and-](https://joint-research-centre.ec.europa.eu/jrc-news-and-updates/wildfires-mediterranean-effis-data-reveal-extent-summer-2023-09-08_en)  
944 [updates/wildfires-mediterranean-effis-data-reveal-extent-summer-2023-09-08\\_en](https://joint-research-centre.ec.europa.eu/jrc-news-and-updates/wildfires-mediterranean-effis-data-reveal-extent-summer-2023-09-08_en), last  
945 access:, 2023.
- 946 Schroeder, W., Oliva, P., Giglio, L., and Csiszar, I. A.: The New VIIRS 375 m active fire  
947 detection data product: Algorithm description and initial assessment, Remote Sensing of  
948 Environment, 143, 85–96, <https://doi.org/10.1016/j.rse.2013.12.008>, 2014.
- 949 Xanthopoulos, G., Zevgoli, E., Kaoukis, K., and Athanasiou, M.: Greece - Lessons not  
950 learned, available at: [https://issuu.com/wildfiremagazine-](https://issuu.com/wildfiremagazine-iawf/docs/wildfire_magazine_q4_2023_-_web)  
951 [iawf/docs/wildfire\\_magazine\\_q4\\_2023\\_-\\_web](https://issuu.com/wildfiremagazine-iawf/docs/wildfire_magazine_q4_2023_-_web), last access:, Wildfire, 2023, 2024.
- 952
